# Supplementary material
Source: ML conference proceedings conference paper supplement (https://openreview.net/forum?id=M19J8UGguq)
Supplement: supplementary_material [file legend_runtime_final.pdf › shapiq/experiments/plots/legend_runtime_final.pdf]

# PolySHAP

## Method

- Evaluations
  - Computation
- RegressionMSR
- 1-PolySHAP (KernelSHAP)
- 2-PolySHAP
- 3-PolySHAP
- 4-PolySHAP
