# Supplementary material (part 2 of 2)
Source: ML conference proceedings conference paper supplement (https://openreview.net/forum?id=M19J8UGguq)

# CG60 ( $d = 60$ )

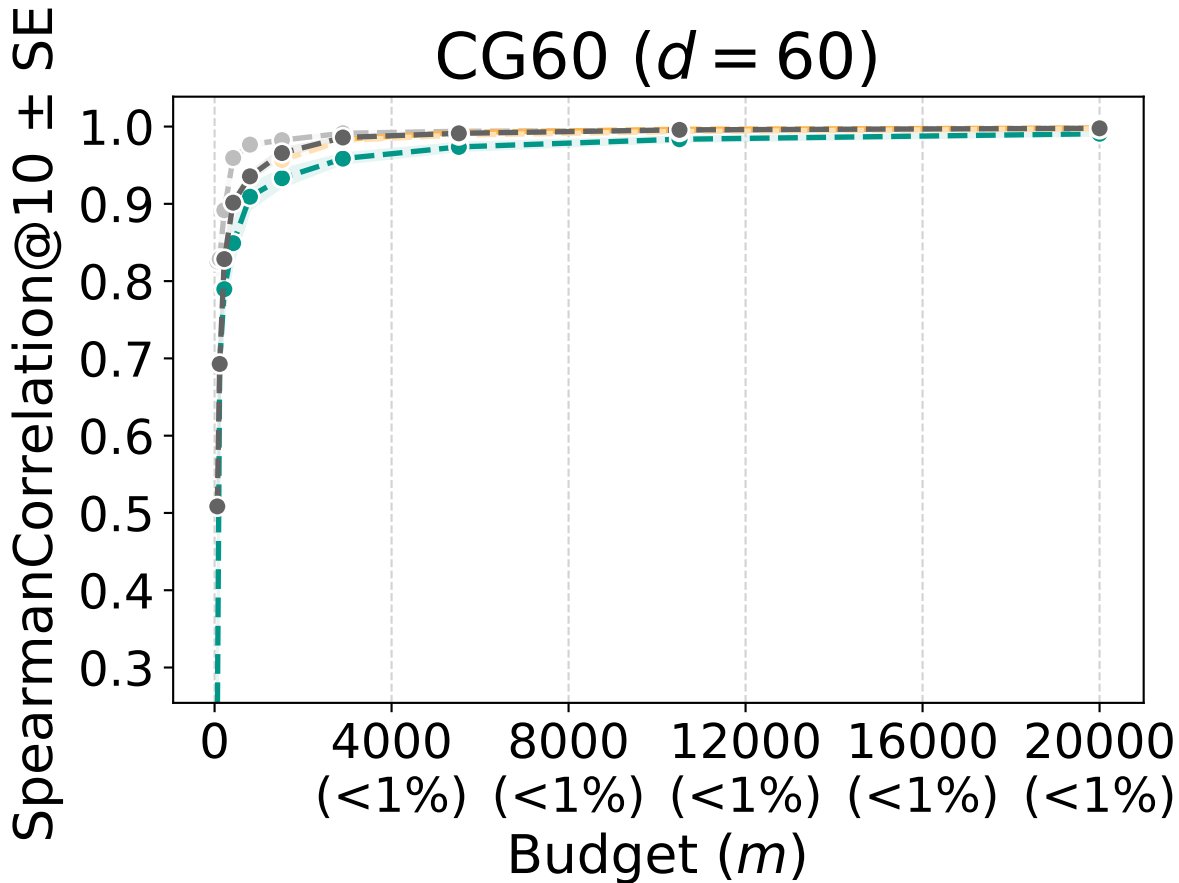

Supplement: supplementary_material [file corrgroups60_random_forest_SpearmanCorrelation@10_standard.pdf › shapiq/experiments/plots/pathdependent/corrgroups60_random_forest_SpearmanCorrelation@10_standard.pdf]

# CG60 ( $d = 60$ )

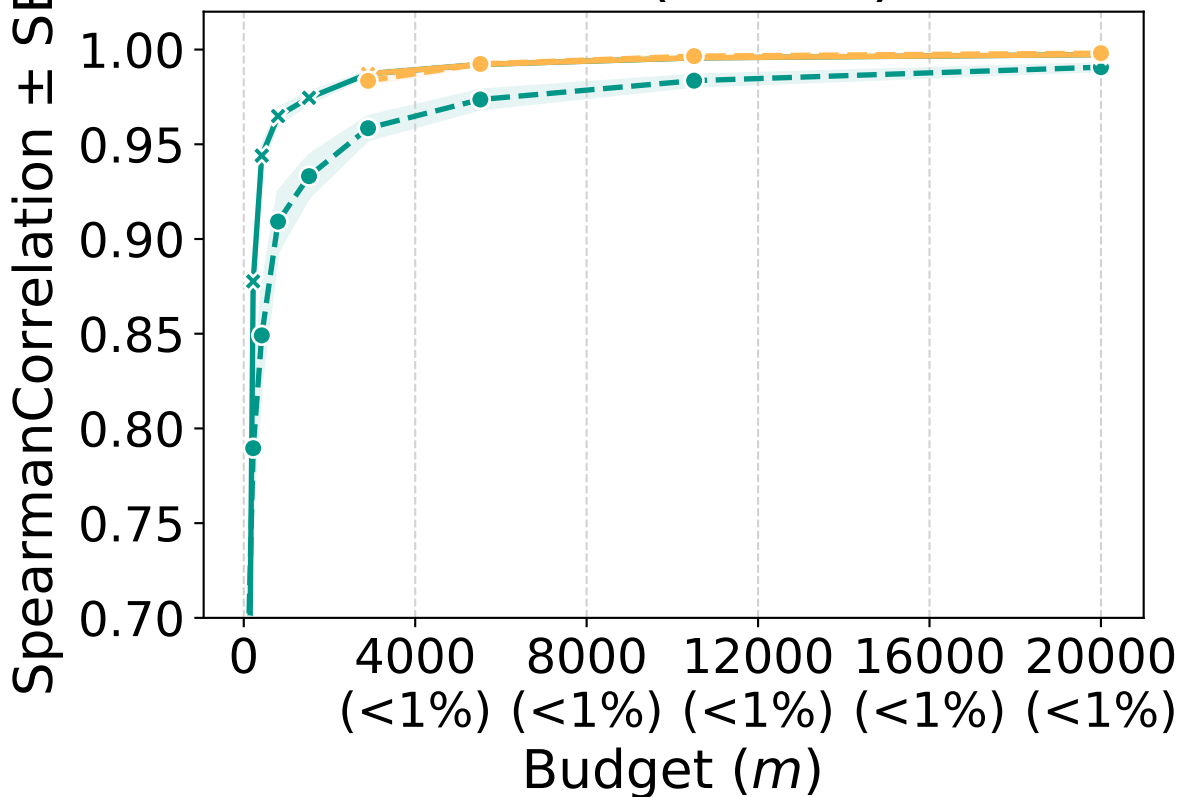

Supplement: supplementary_material [file corrgroups60_random_forest_SpearmanCorrelation_paired_vs_standard.pdf › shapiq/experiments/plots/pathdependent/corrgroups60_random_forest_SpearmanCorrelation_paired_vs_standard.pdf]

# CG60 ( $d = 60$ )

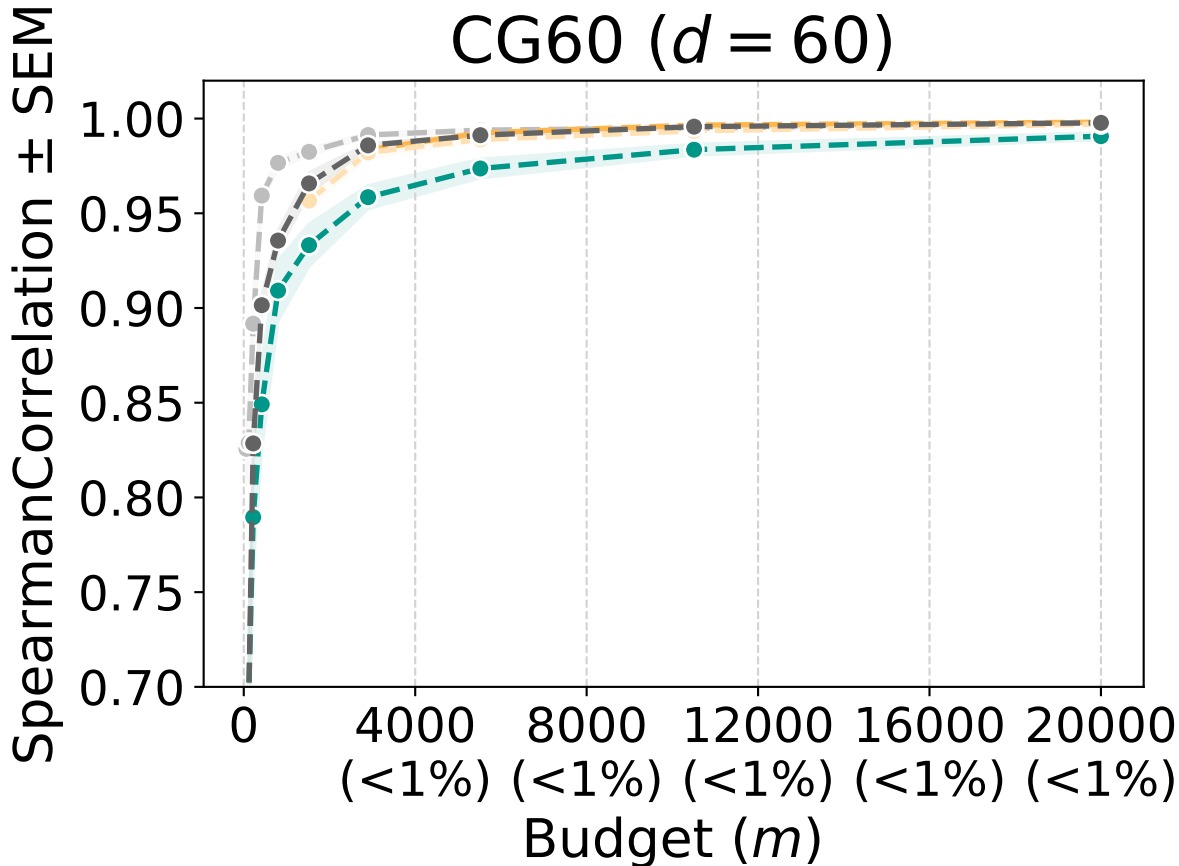

Supplement: supplementary_material [file corrgroups60_random_forest_SpearmanCorrelation_standard.pdf › shapiq/experiments/plots/pathdependent/corrgroups60_random_forest_SpearmanCorrelation_standard.pdf]

# Forest ( $d = 13$ )

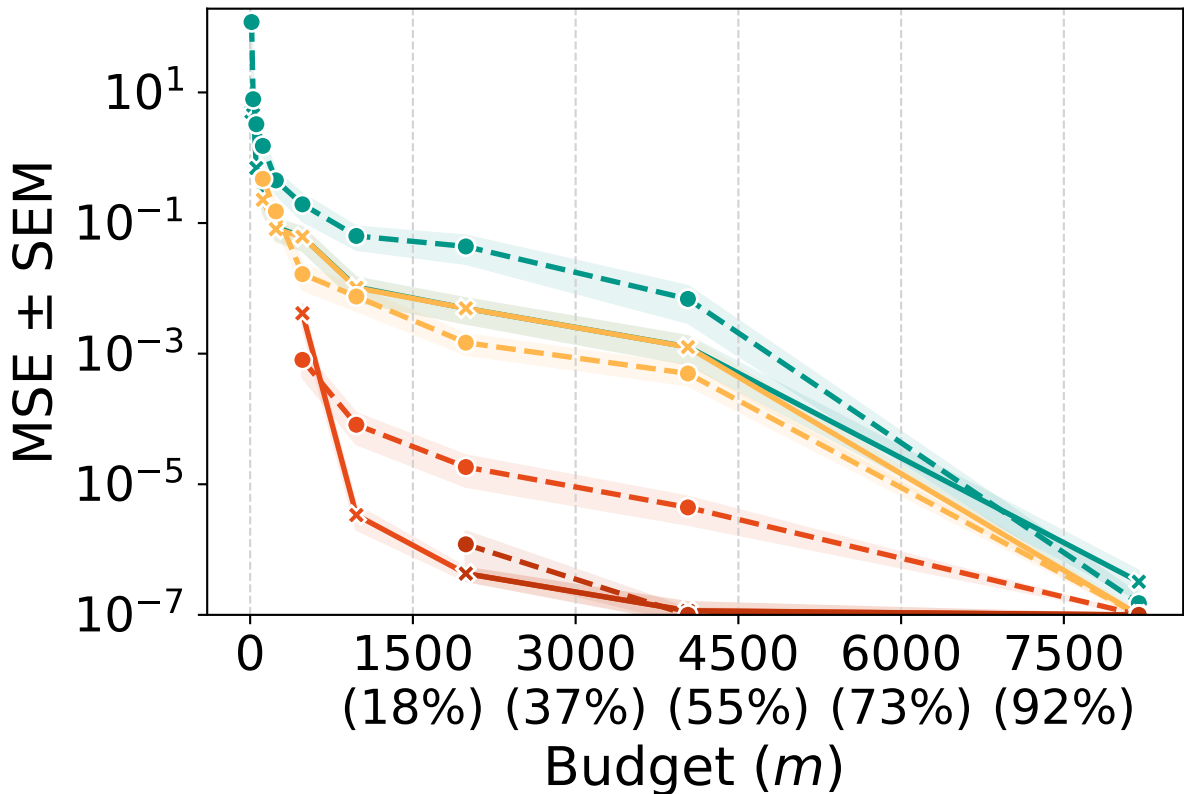

Supplement: supplementary_material [file forest_fires_random_forest_MSE_paired_vs_standard.pdf › shapiq/experiments/plots/pathdependent/forest_fires_random_forest_MSE_paired_vs_standard.pdf]

# Forest ( $d = 13$ )

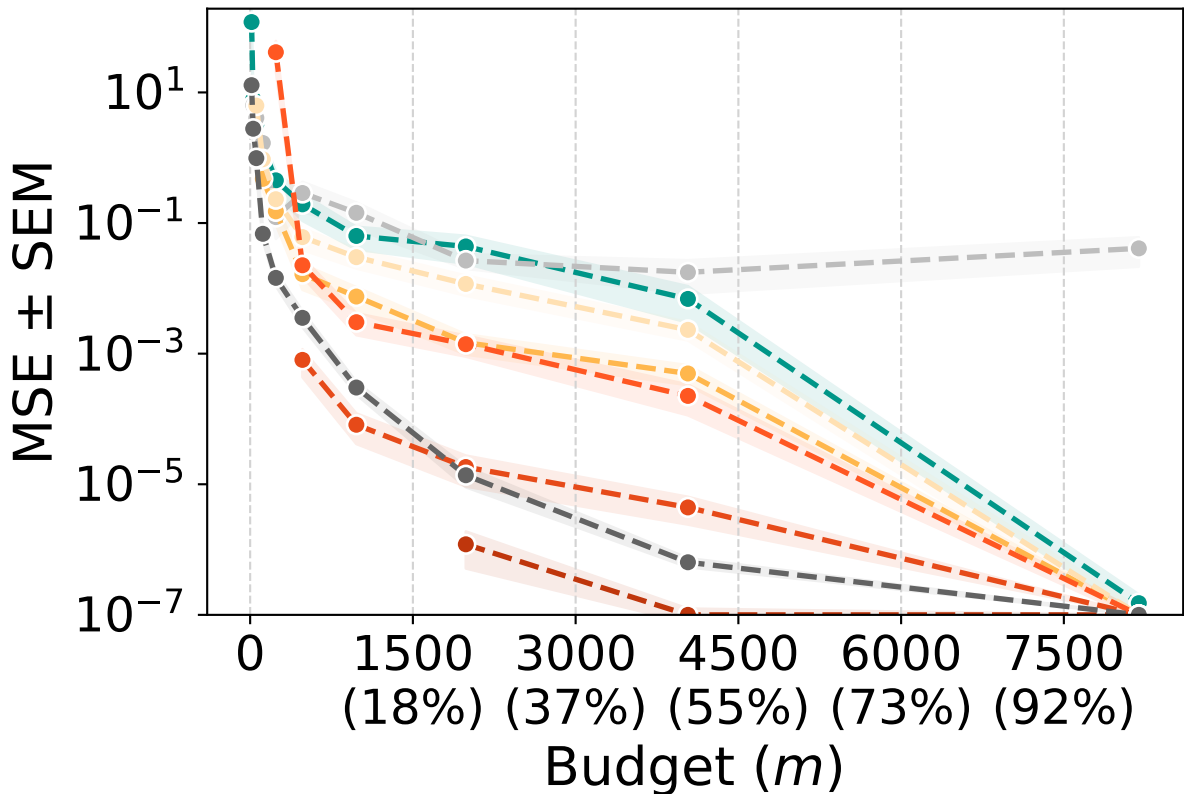

Supplement: supplementary_material [file forest_fires_random_forest_MSE_standard.pdf › shapiq/experiments/plots/pathdependent/forest_fires_random_forest_MSE_standard.pdf]

# Forest ( $d = 13$ )

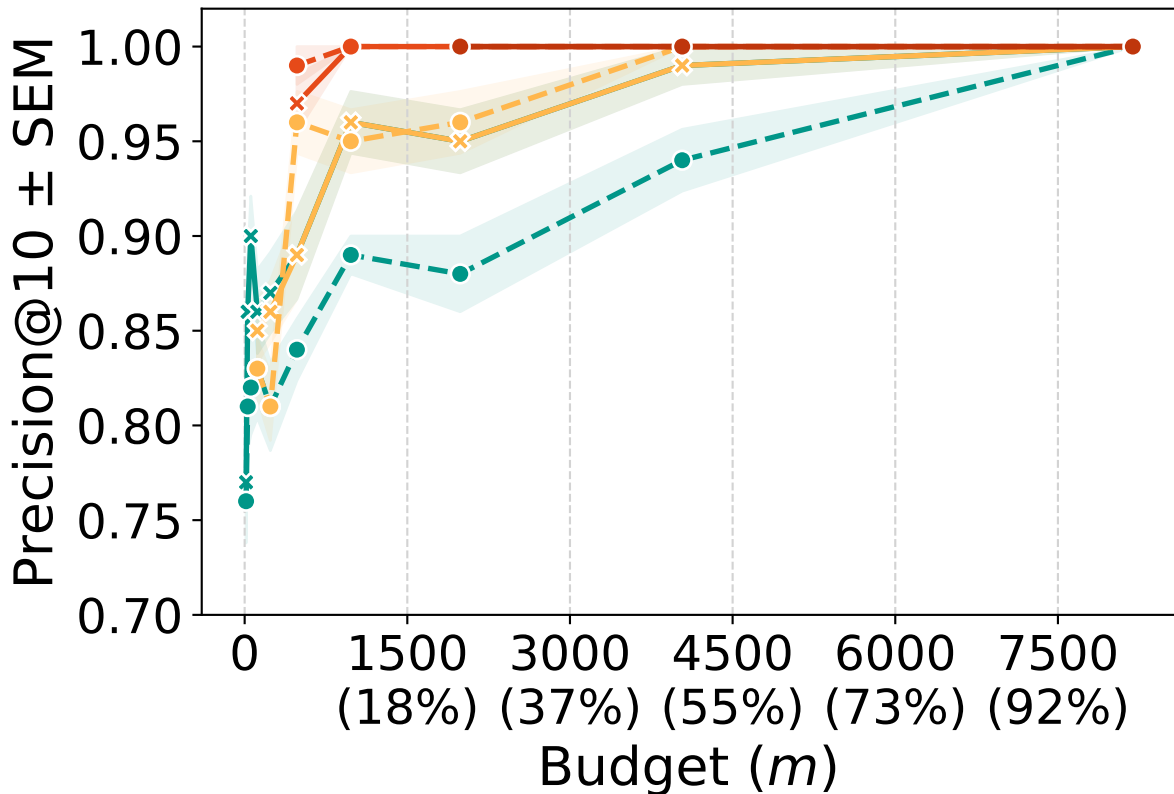

Supplement: supplementary_material [file forest_fires_random_forest_Precision@10_paired_vs_standard.pdf › shapiq/experiments/plots/pathdependent/forest_fires_random_forest_Precision@10_paired_vs_standard.pdf]

# Forest ( $d = 13$ )

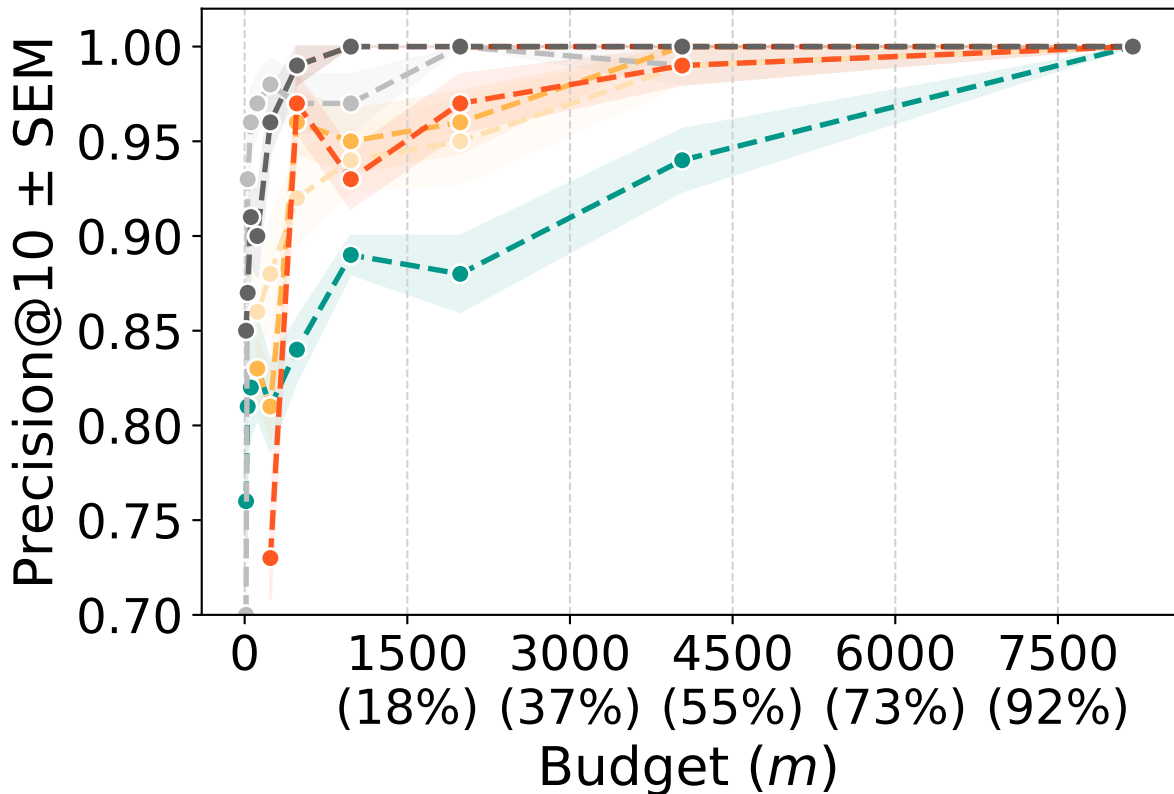

Supplement: supplementary_material [file forest_fires_random_forest_Precision@10_standard.pdf › shapiq/experiments/plots/pathdependent/forest_fires_random_forest_Precision@10_standard.pdf]

# Forest ( $d = 13$ )

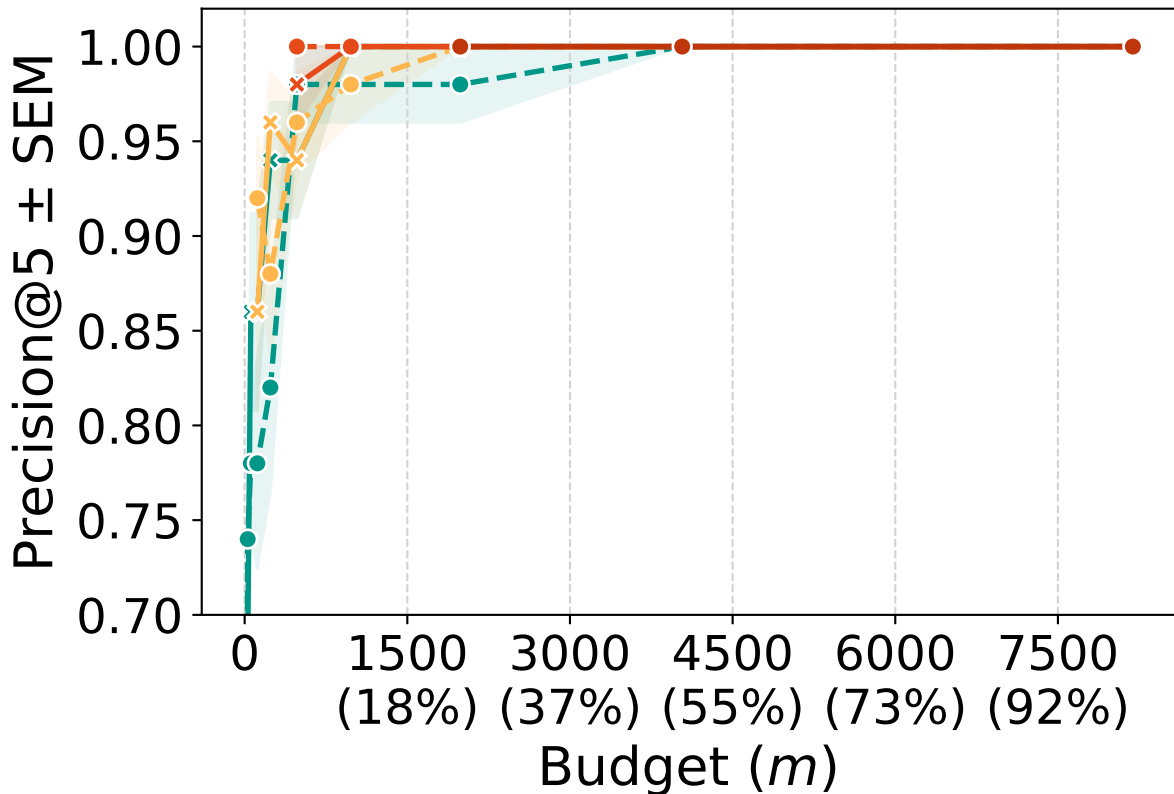

Supplement: supplementary_material [file forest_fires_random_forest_Precision@5_paired_vs_standard.pdf › shapiq/experiments/plots/pathdependent/forest_fires_random_forest_Precision@5_paired_vs_standard.pdf]

# Forest ( $d = 13$ )

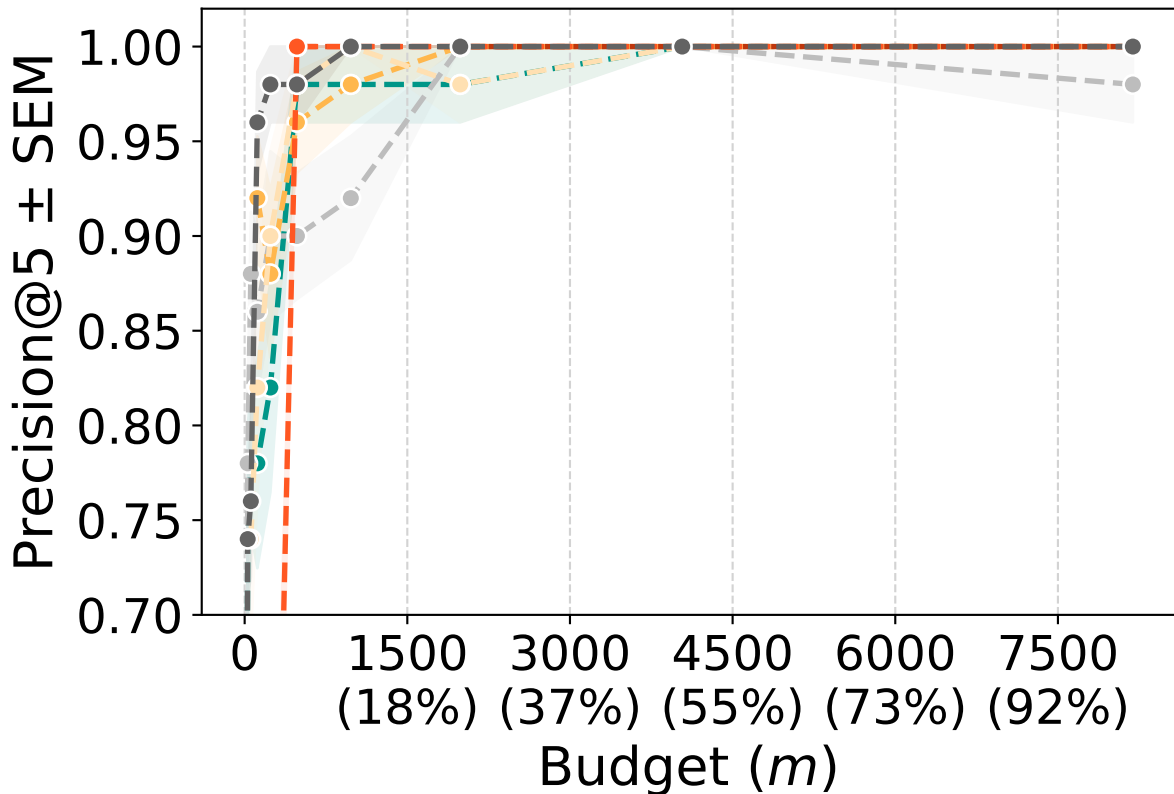

Supplement: supplementary_material [file forest_fires_random_forest_Precision@5_standard.pdf › shapiq/experiments/plots/pathdependent/forest_fires_random_forest_Precision@5_standard.pdf]

# Forest ( $d = 13$ )

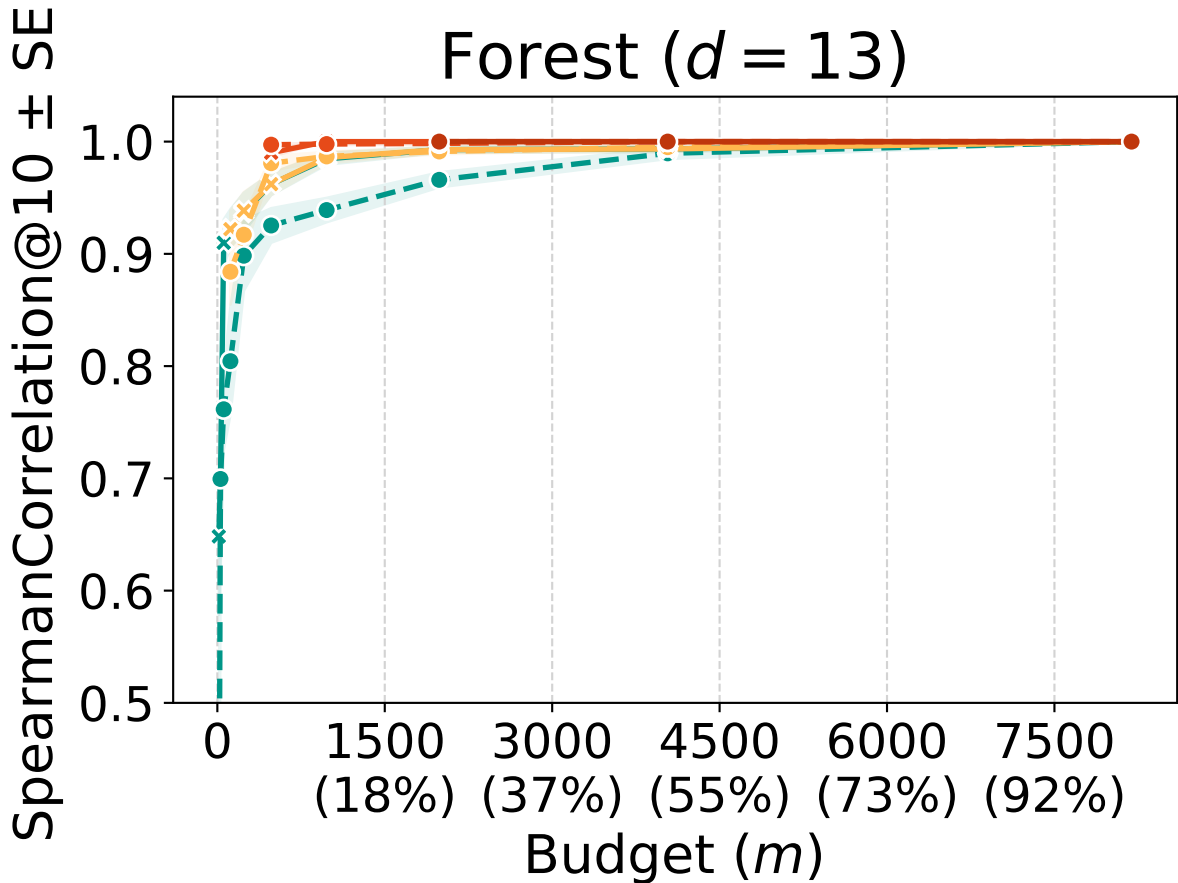

Supplement: supplementary_material [file forest_fires_random_forest_SpearmanCorrelation@10_paired_vs_standard.pdf › shapiq/experiments/plots/pathdependent/forest_fires_random_forest_SpearmanCorrelation@10_paired_vs_standard.pdf]

# Forest ( $d = 13$ )

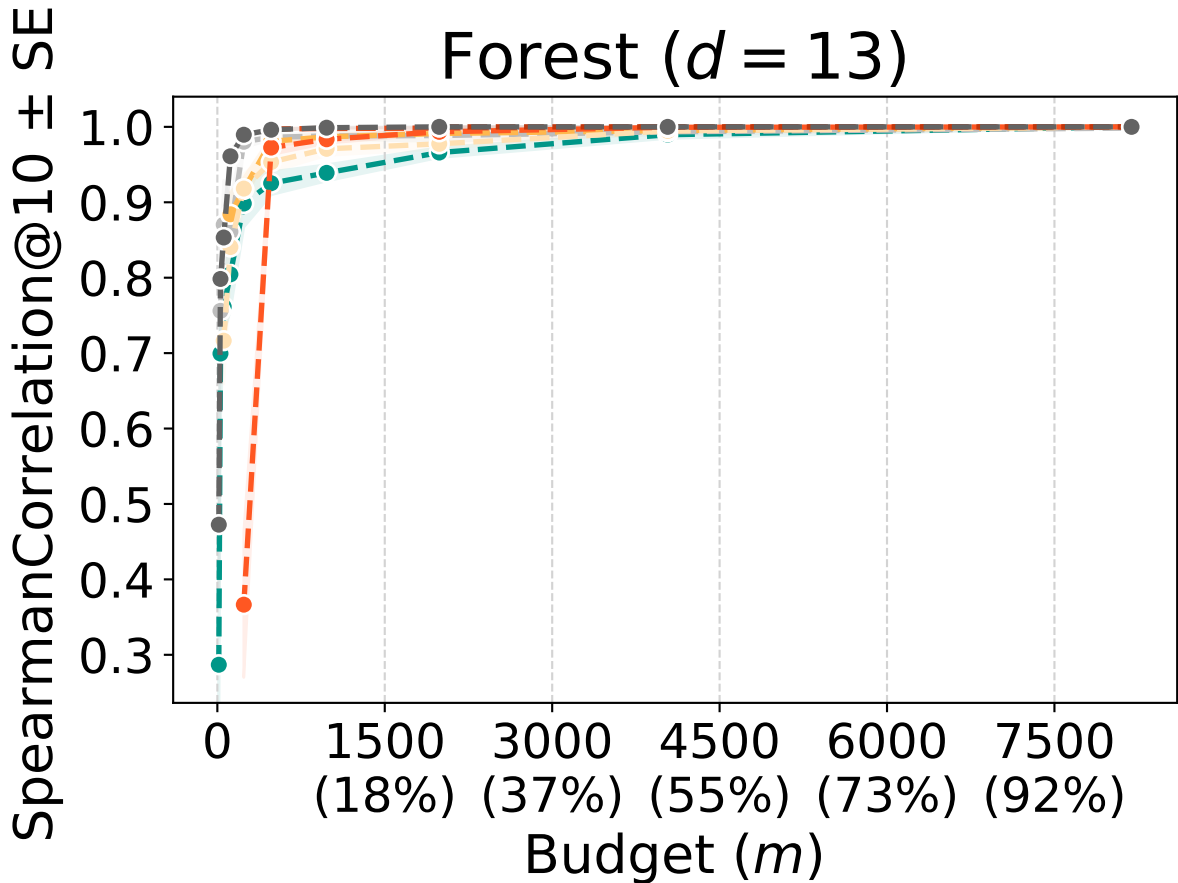

Supplement: supplementary_material [file forest_fires_random_forest_SpearmanCorrelation@10_standard.pdf › shapiq/experiments/plots/pathdependent/forest_fires_random_forest_SpearmanCorrelation@10_standard.pdf]

# Forest ( $d = 13$ )

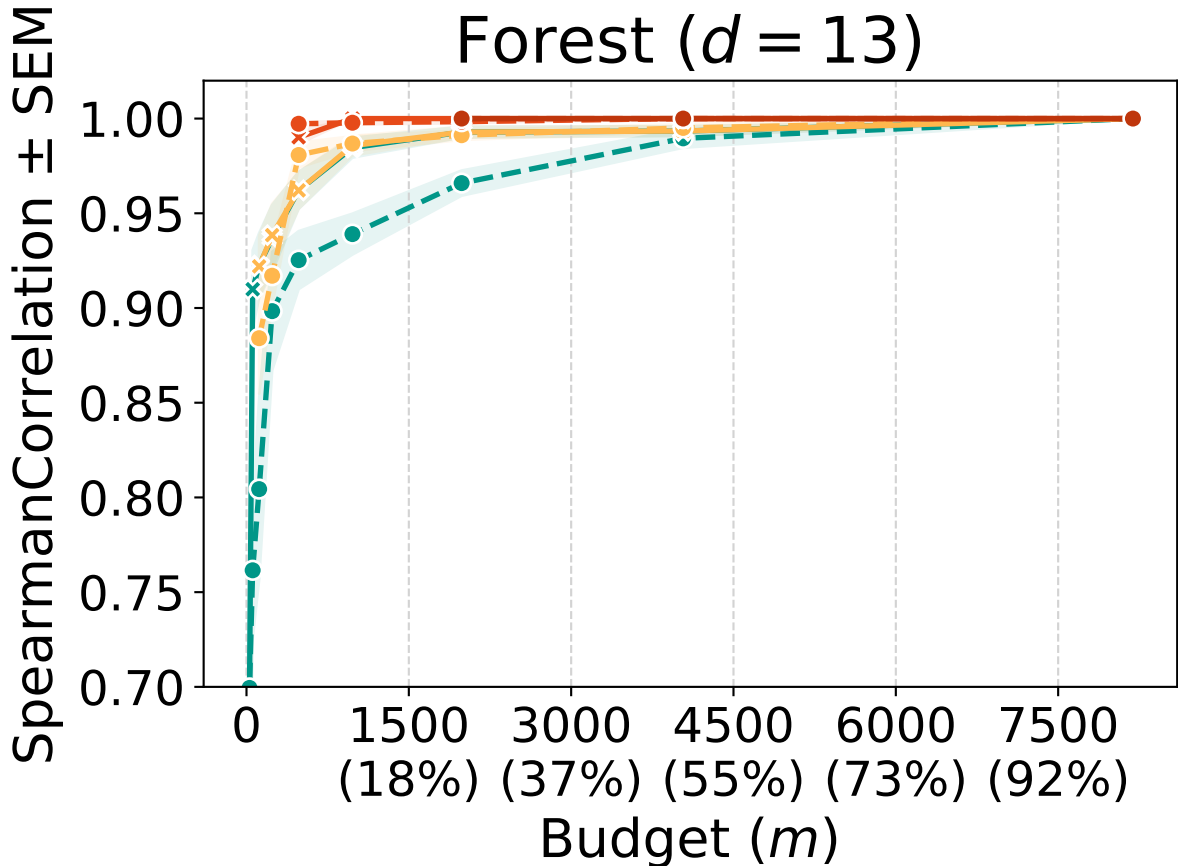

Supplement: supplementary_material [file forest_fires_random_forest_SpearmanCorrelation_paired_vs_standard.pdf › shapiq/experiments/plots/pathdependent/forest_fires_random_forest_SpearmanCorrelation_paired_vs_standard.pdf]

# Forest ( $d = 13$ )

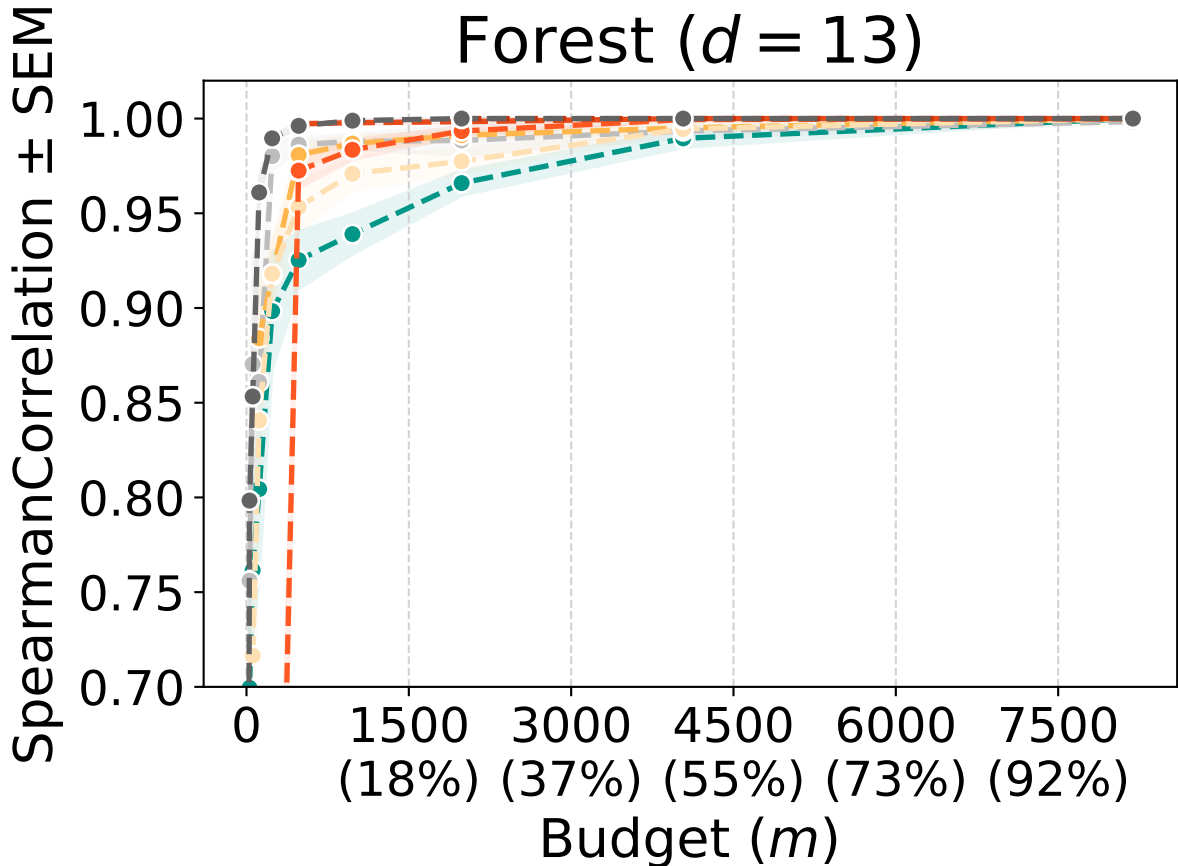

Supplement: supplementary_material [file forest_fires_random_forest_SpearmanCorrelation_standard.pdf › shapiq/experiments/plots/pathdependent/forest_fires_random_forest_SpearmanCorrelation_standard.pdf]

# IL60 ( $d = 60$ )

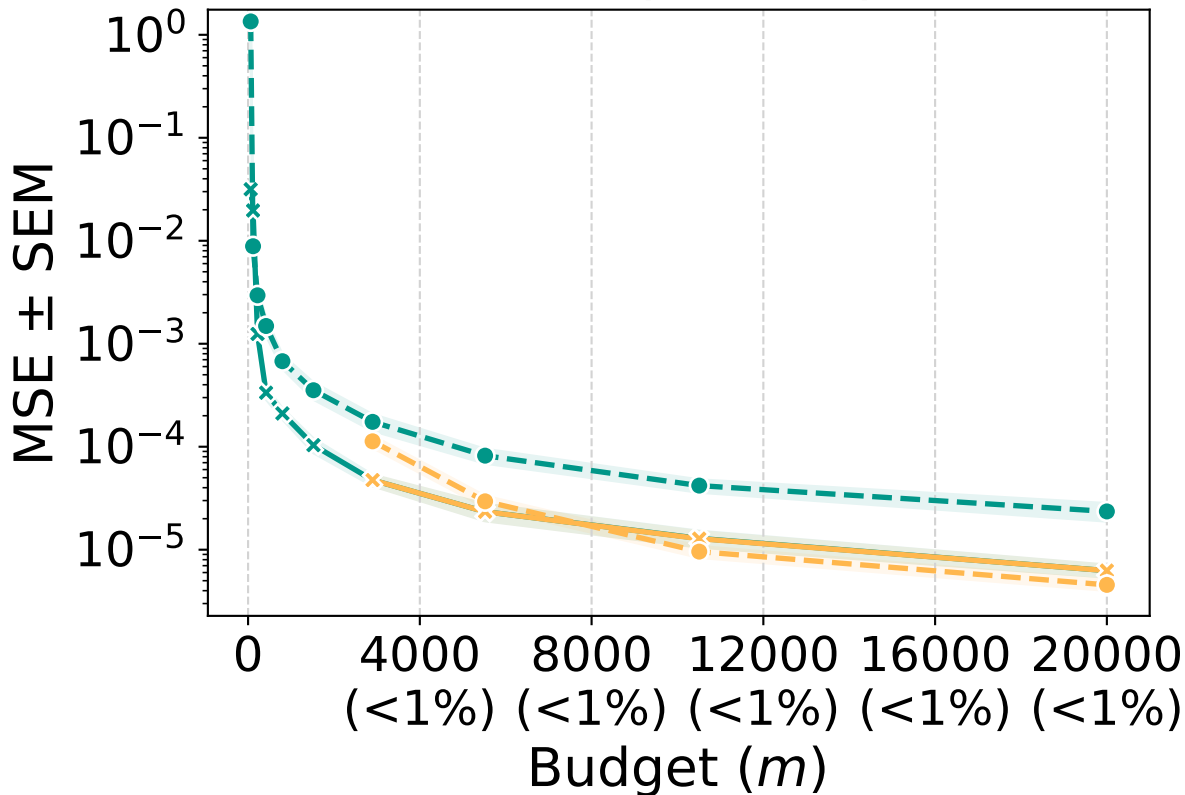

Supplement: supplementary_material [file independentlinear60_random_forest_MSE_paired_vs_standard.pdf › shapiq/experiments/plots/pathdependent/independentlinear60_random_forest_MSE_paired_vs_standard.pdf]

# IL60 ( $d = 60$ )

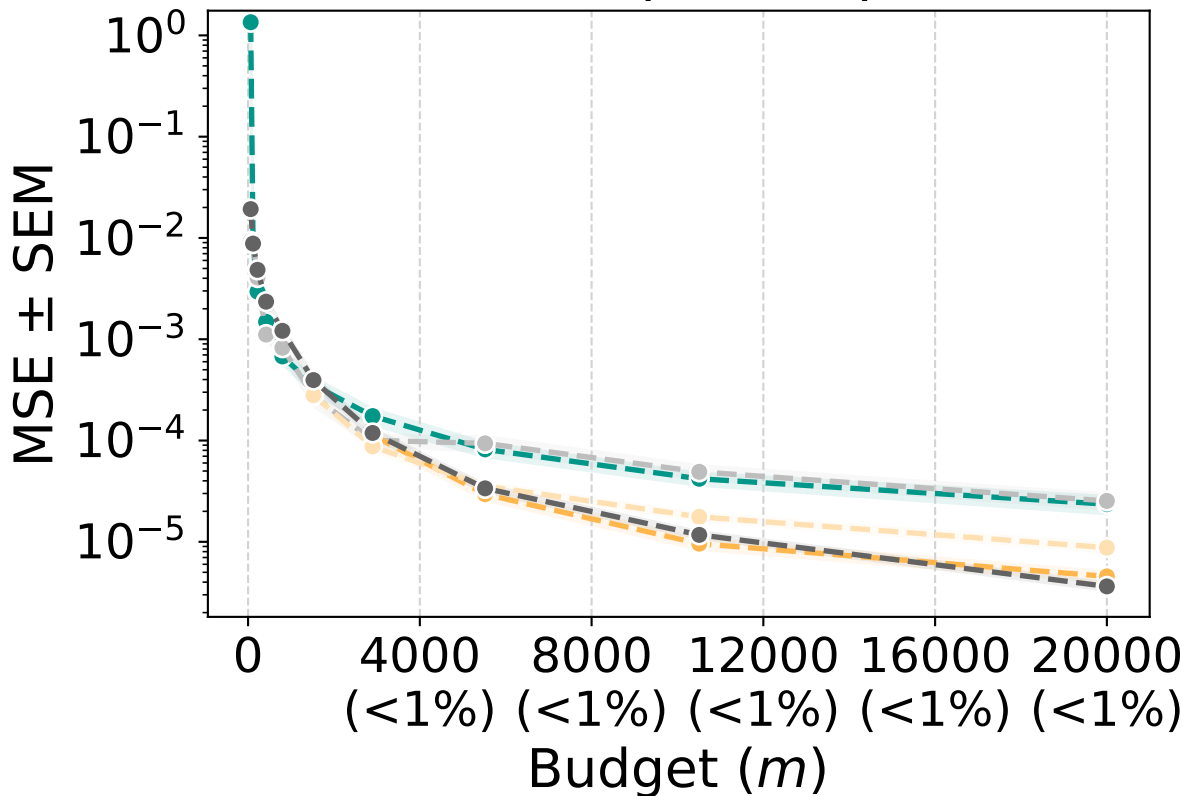

Supplement: supplementary_material [file independentlinear60_random_forest_MSE_standard.pdf › shapiq/experiments/plots/pathdependent/independentlinear60_random_forest_MSE_standard.pdf]

# IL60 ( $d = 60$ )

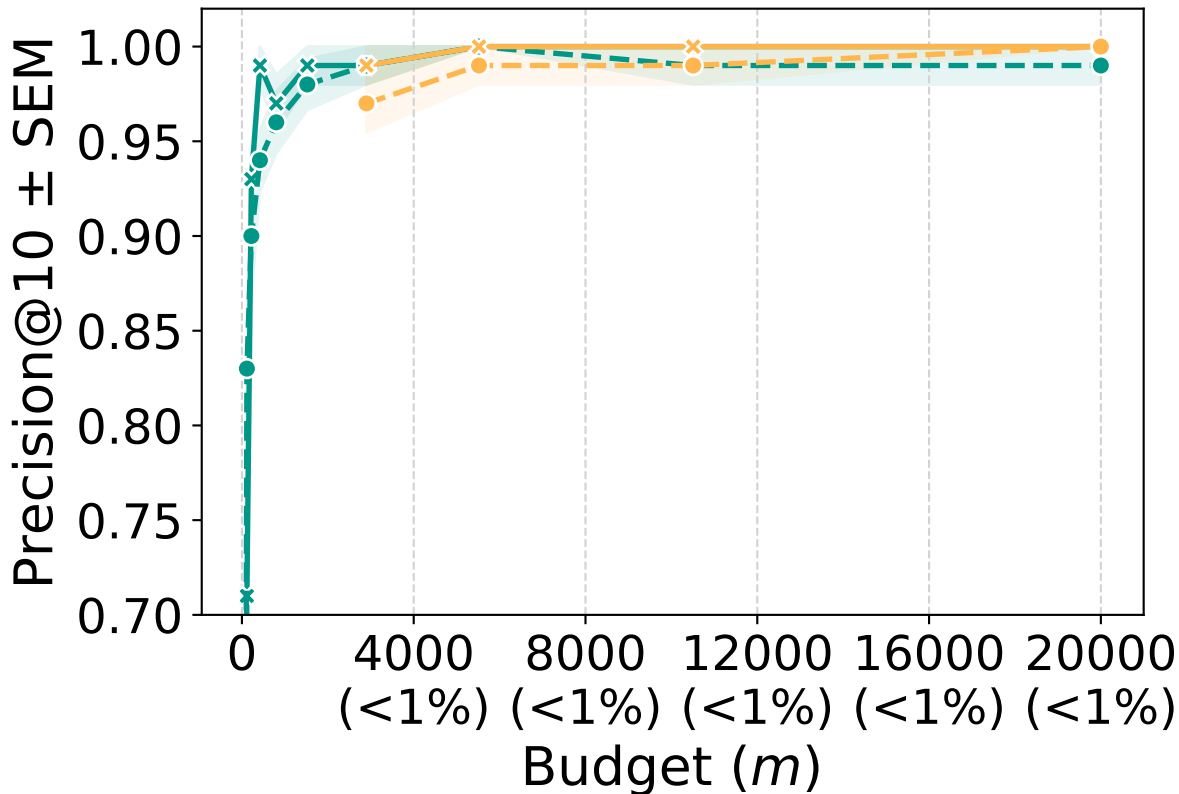

Supplement: supplementary_material [file independentlinear60_random_forest_Precision@10_paired_vs_standard.pdf › shapiq/experiments/plots/pathdependent/independentlinear60_random_forest_Precision@10_paired_vs_standard.pdf]

# IL60 ( $d = 60$ )

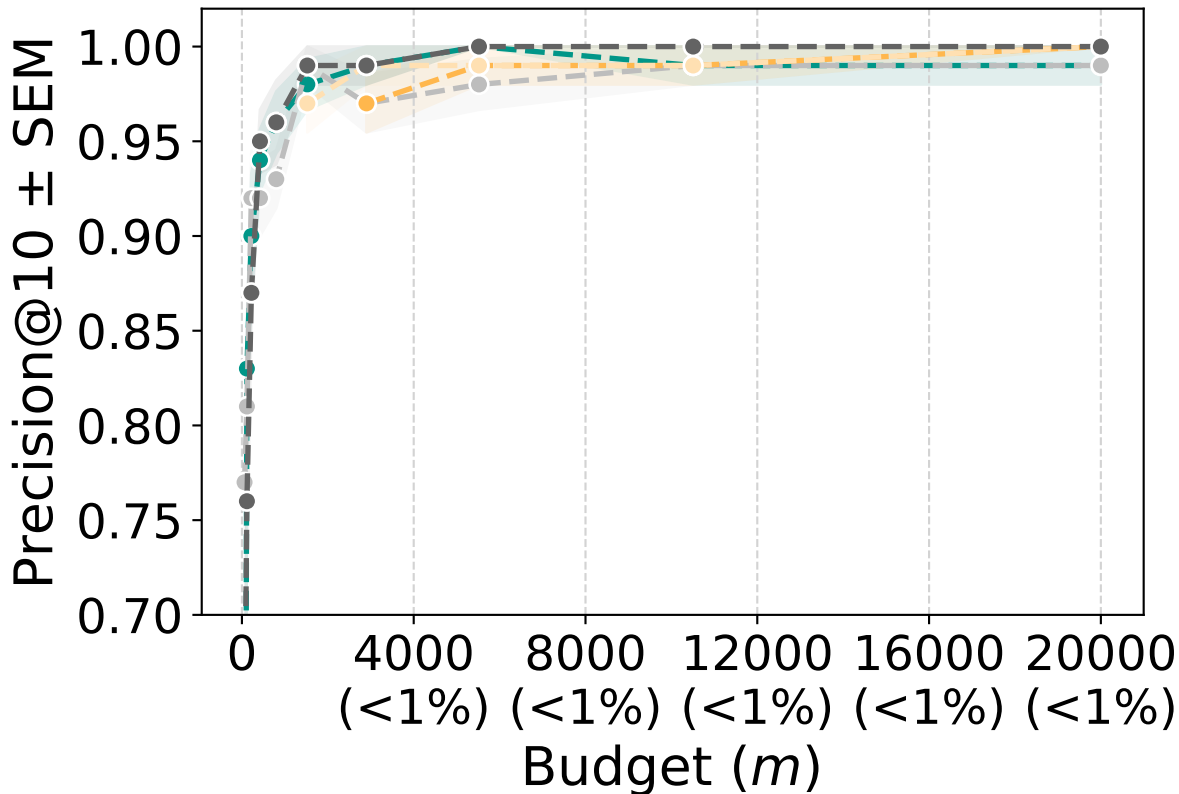

Supplement: supplementary_material [file independentlinear60_random_forest_Precision@10_standard.pdf › shapiq/experiments/plots/pathdependent/independentlinear60_random_forest_Precision@10_standard.pdf]

# IL60 ( $d = 60$ )

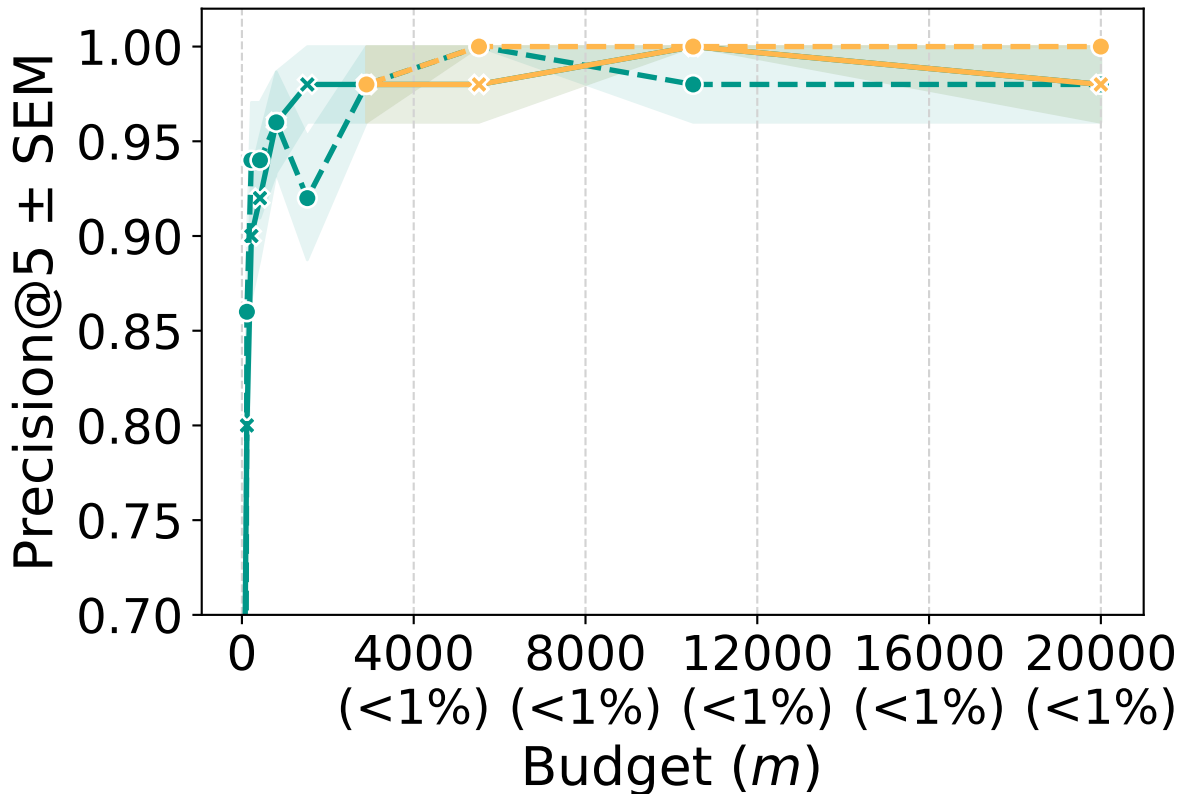

Supplement: supplementary_material [file independentlinear60_random_forest_Precision@5_paired_vs_standard.pdf › shapiq/experiments/plots/pathdependent/independentlinear60_random_forest_Precision@5_paired_vs_standard.pdf]

# IL60 ( $d = 60$ )

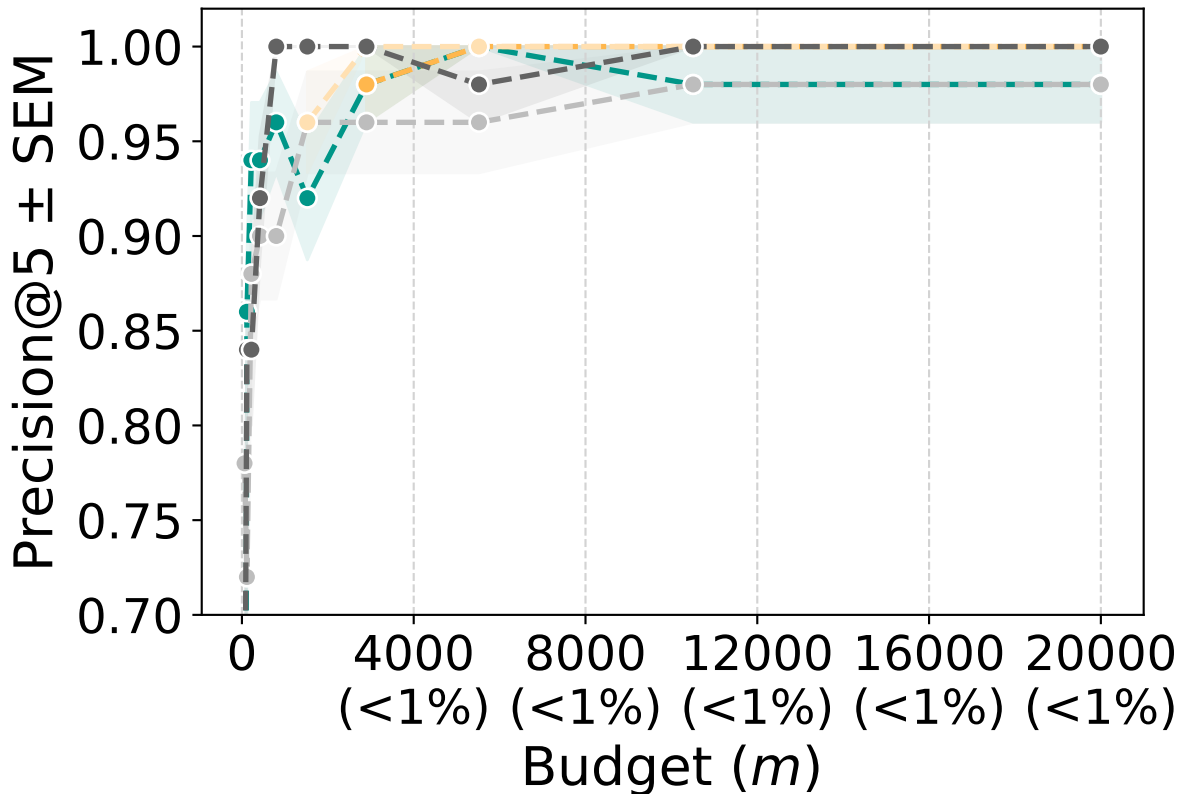

Supplement: supplementary_material [file independentlinear60_random_forest_Precision@5_standard.pdf › shapiq/experiments/plots/pathdependent/independentlinear60_random_forest_Precision@5_standard.pdf]

# IL60 ( $d = 60$ )

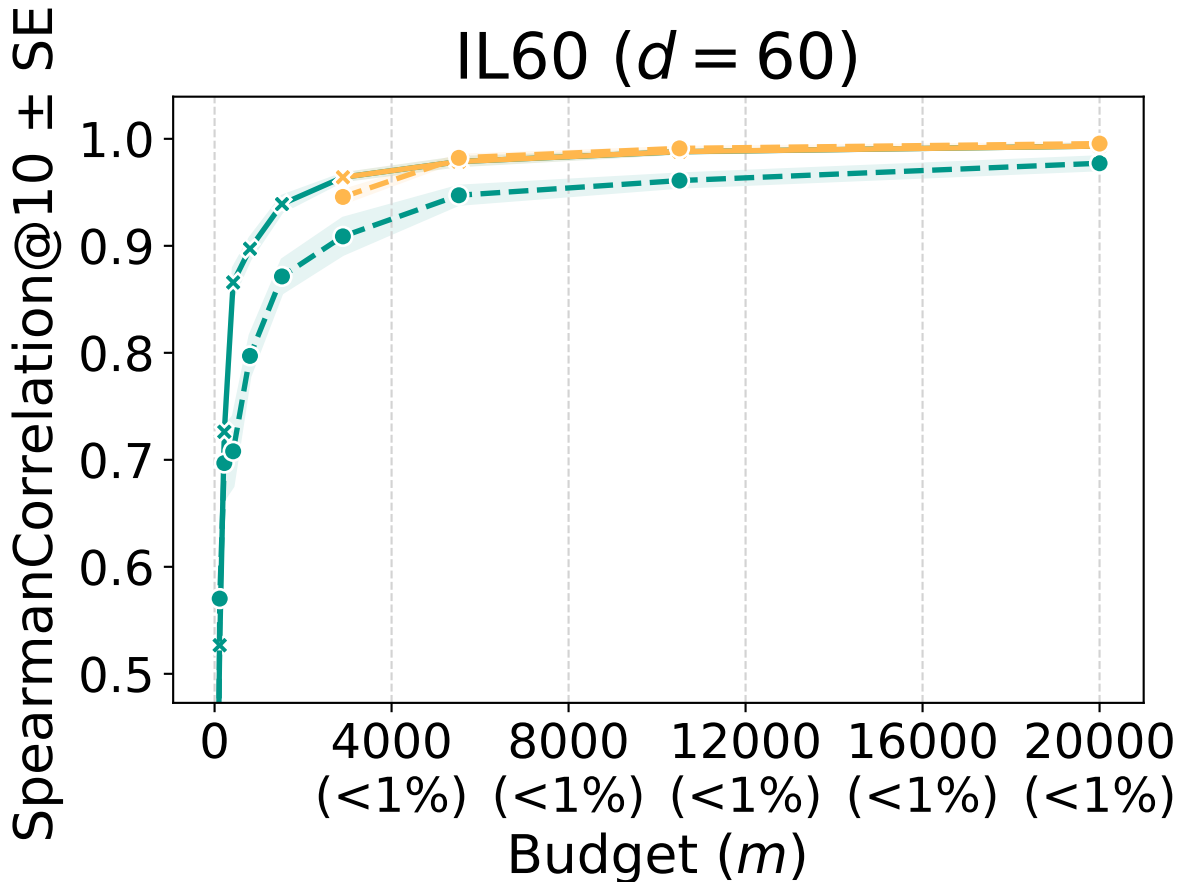

Supplement: supplementary_material [file independentlinear60_random_forest_SpearmanCorrelation@10_paired_vs_standard.pdf › shapiq/experiments/plots/pathdependent/independentlinear60_random_forest_SpearmanCorrelation@10_paired_vs_standard.pdf]

# IL60 ( $d = 60$ )

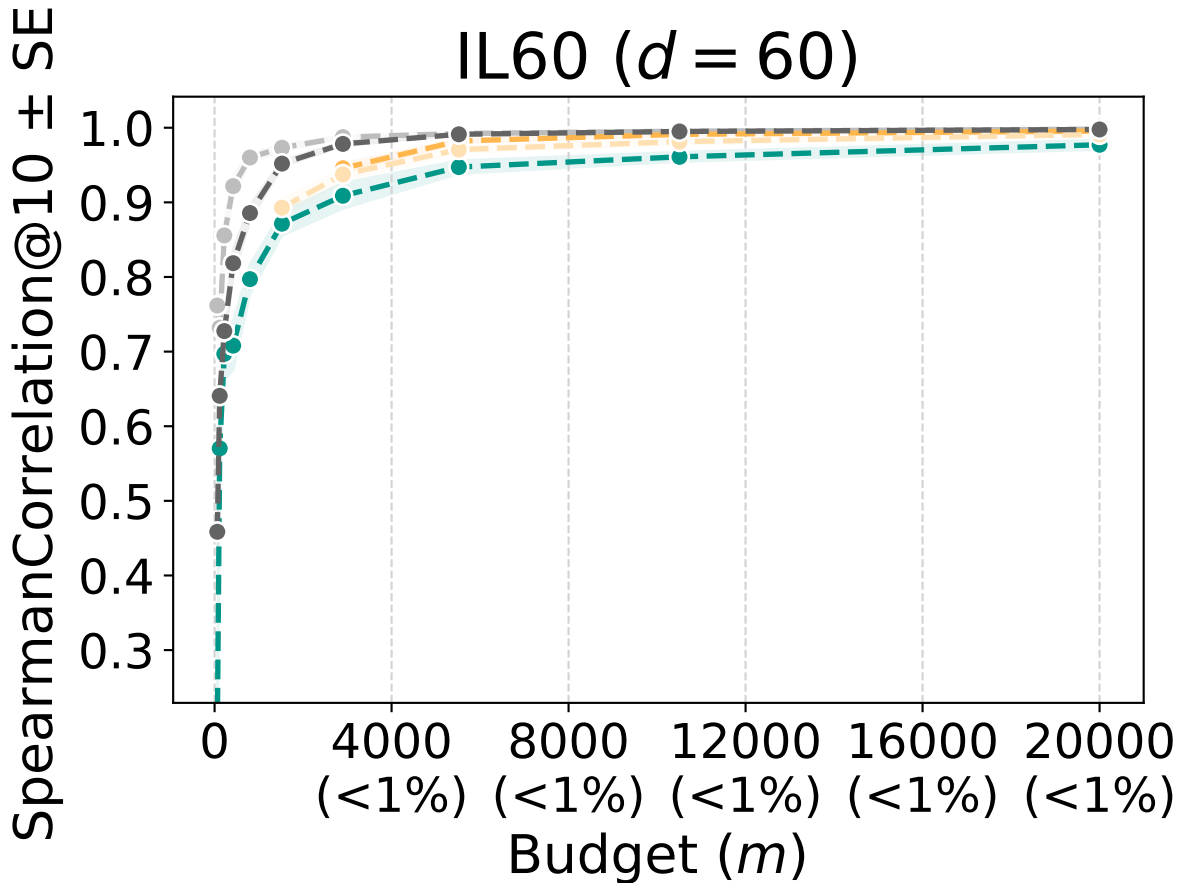

Supplement: supplementary_material [file independentlinear60_random_forest_SpearmanCorrelation@10_standard.pdf › shapiq/experiments/plots/pathdependent/independentlinear60_random_forest_SpearmanCorrelation@10_standard.pdf]

# IL60 ( $d = 60$ )

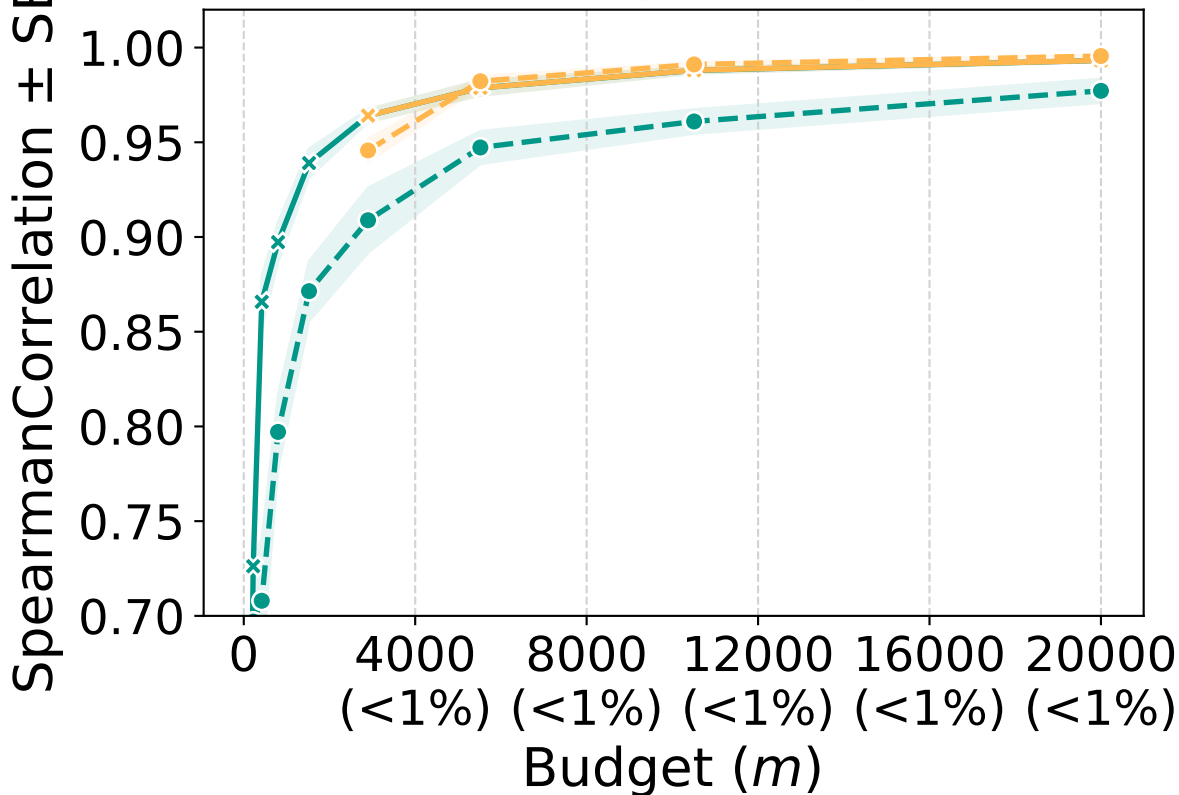

Supplement: supplementary_material [file independentlinear60_random_forest_SpearmanCorrelation_paired_vs_standard.pdf › shapiq/experiments/plots/pathdependent/independentlinear60_random_forest_SpearmanCorrelation_paired_vs_standard.pdf]

# IL60 ( $d = 60$ )

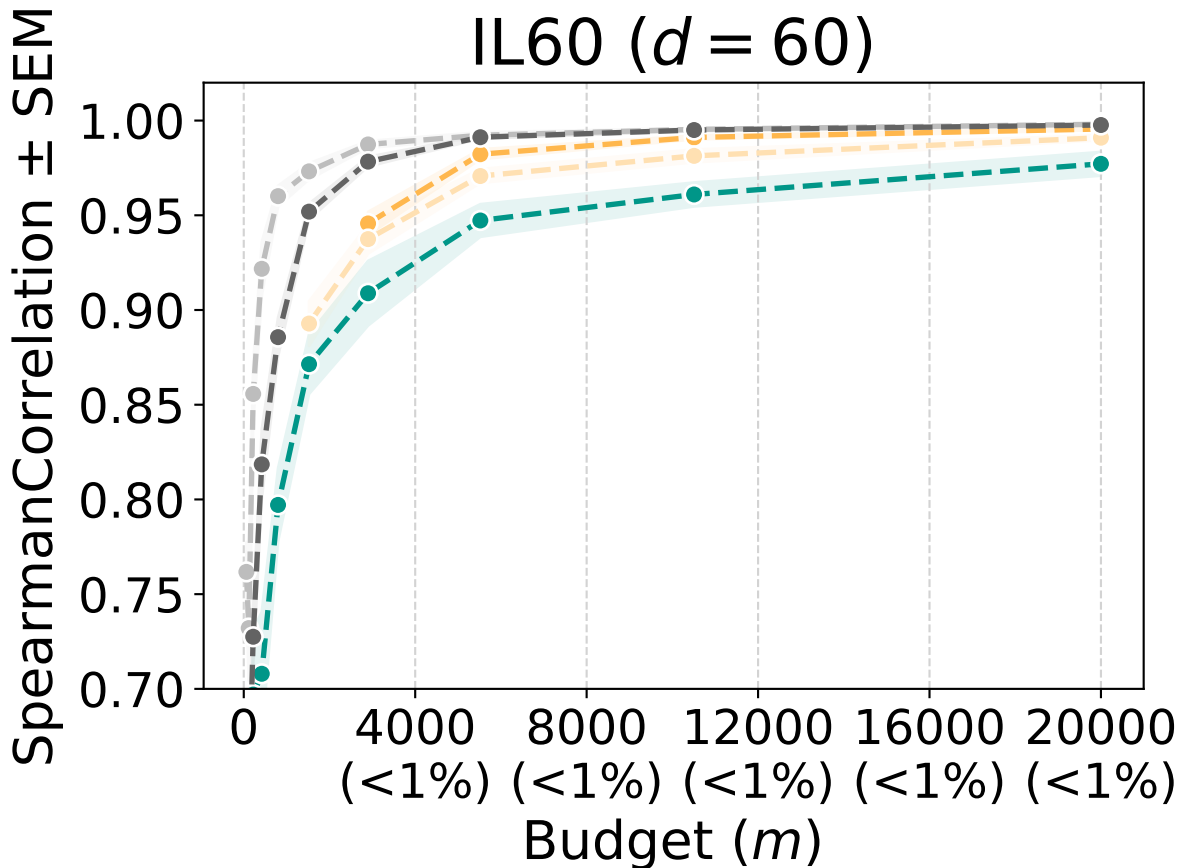

Supplement: supplementary_material [file independentlinear60_random_forest_SpearmanCorrelation_standard.pdf › shapiq/experiments/plots/pathdependent/independentlinear60_random_forest_SpearmanCorrelation_standard.pdf]

# NHANES ( $d = 79$ )

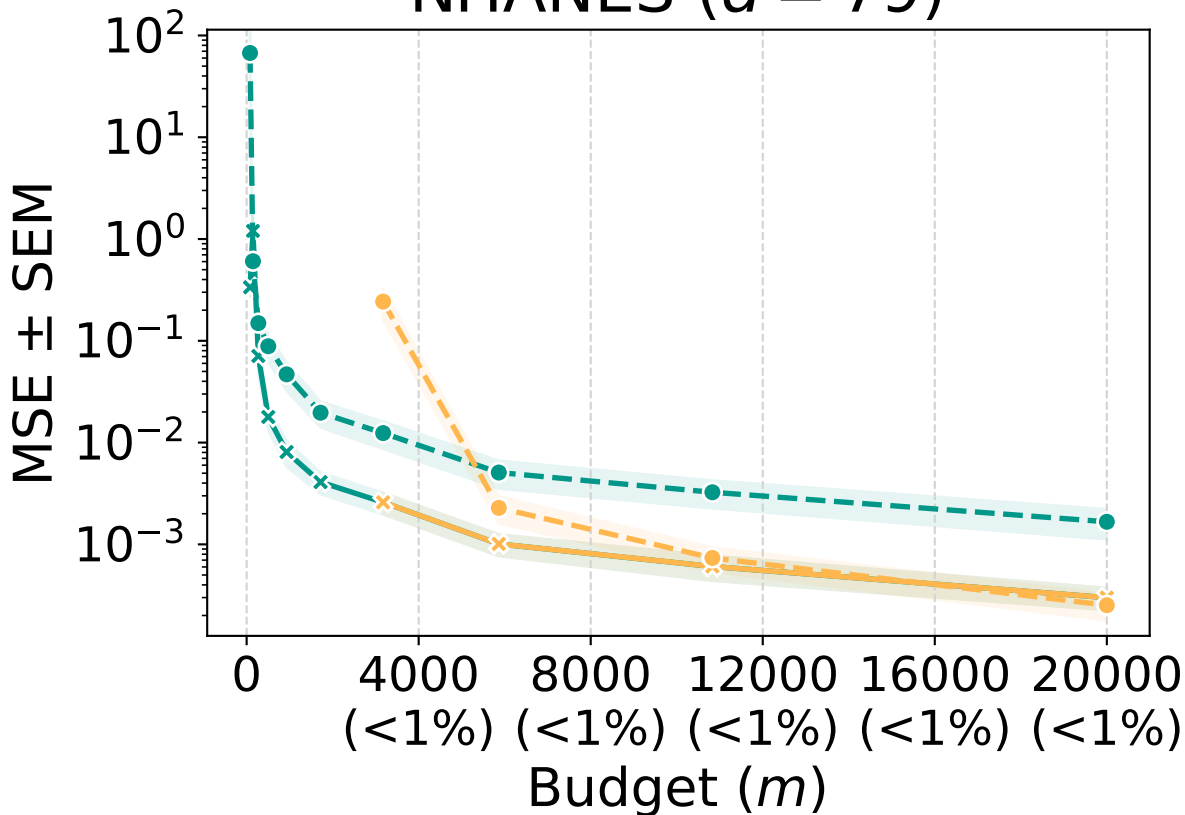

Supplement: supplementary_material [file nhanesi_random_forest_MSE_paired_vs_standard.pdf › shapiq/experiments/plots/pathdependent/nhanesi_random_forest_MSE_paired_vs_standard.pdf]

# NHANES ( $d = 79$ )

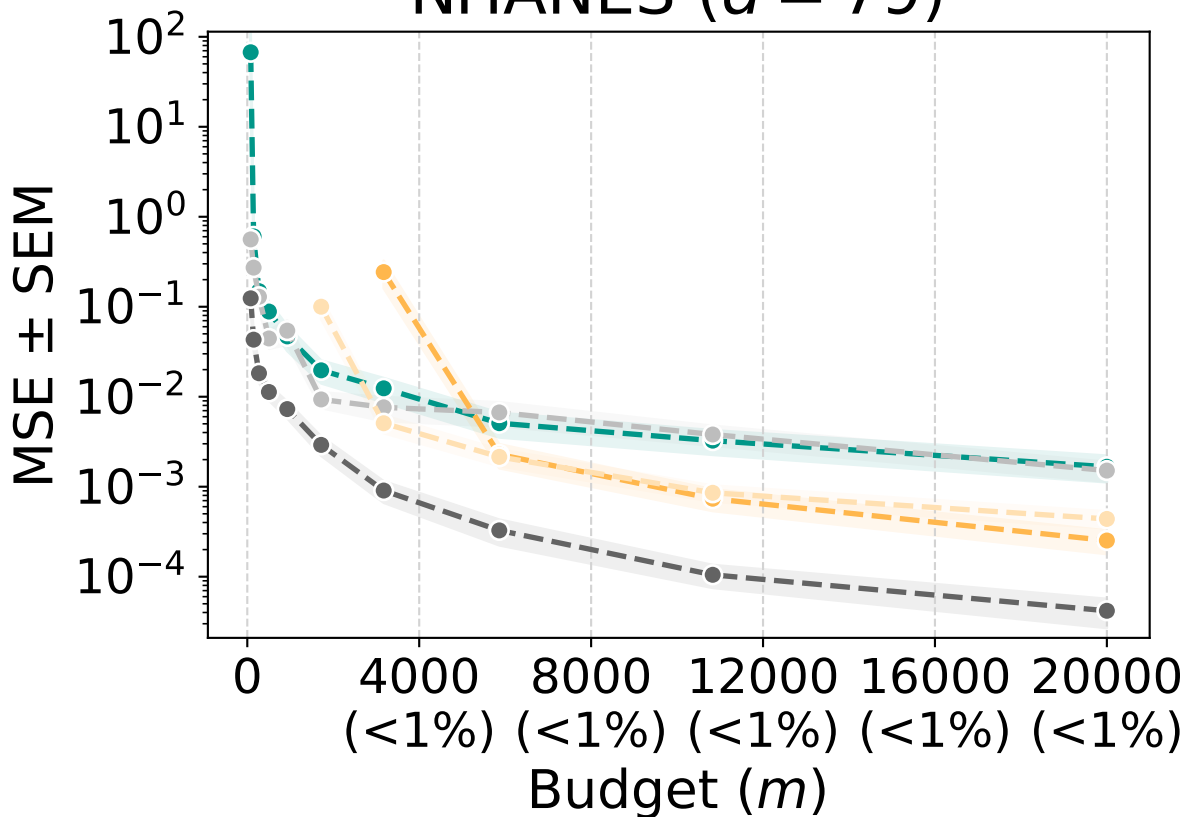

Supplement: supplementary_material [file nhanesi_random_forest_MSE_standard.pdf › shapiq/experiments/plots/pathdependent/nhanesi_random_forest_MSE_standard.pdf]

# NHANES ( $d = 79$ )

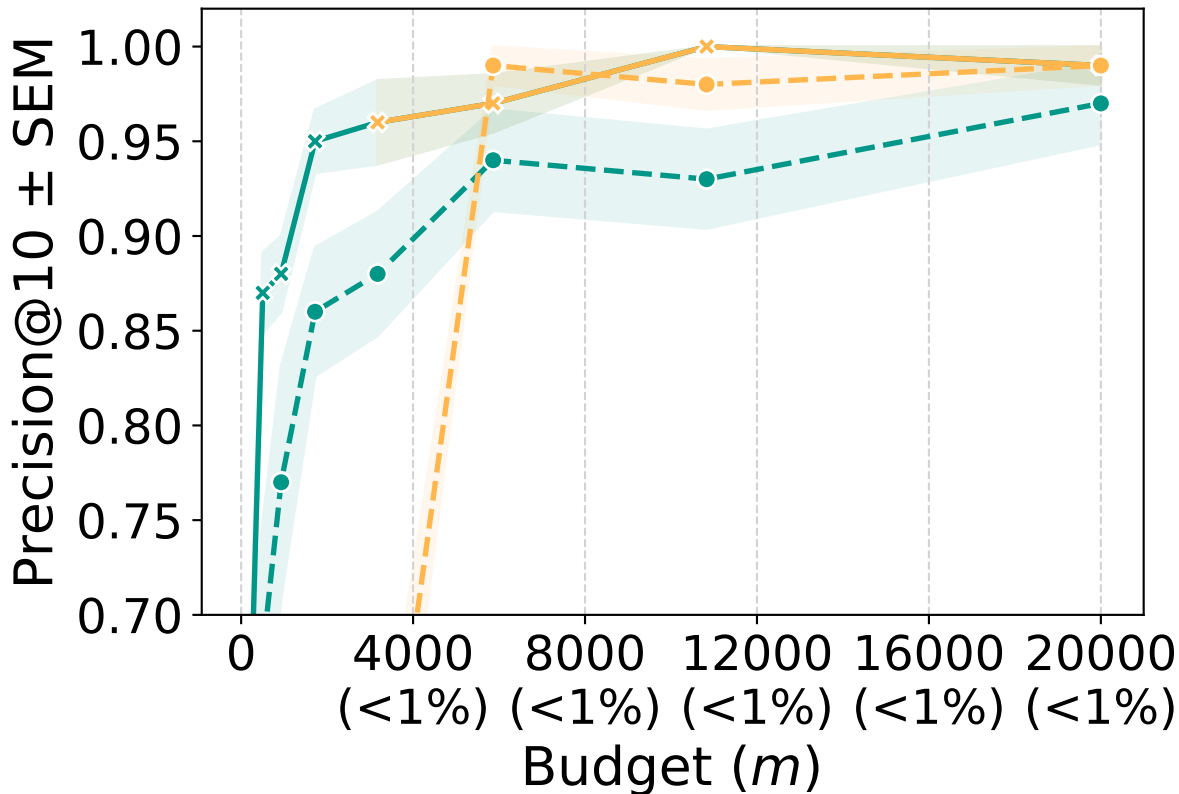

Supplement: supplementary_material [file nhanesi_random_forest_Precision@10_paired_vs_standard.pdf › shapiq/experiments/plots/pathdependent/nhanesi_random_forest_Precision@10_paired_vs_standard.pdf]

# NHANES ( $d = 79$ )

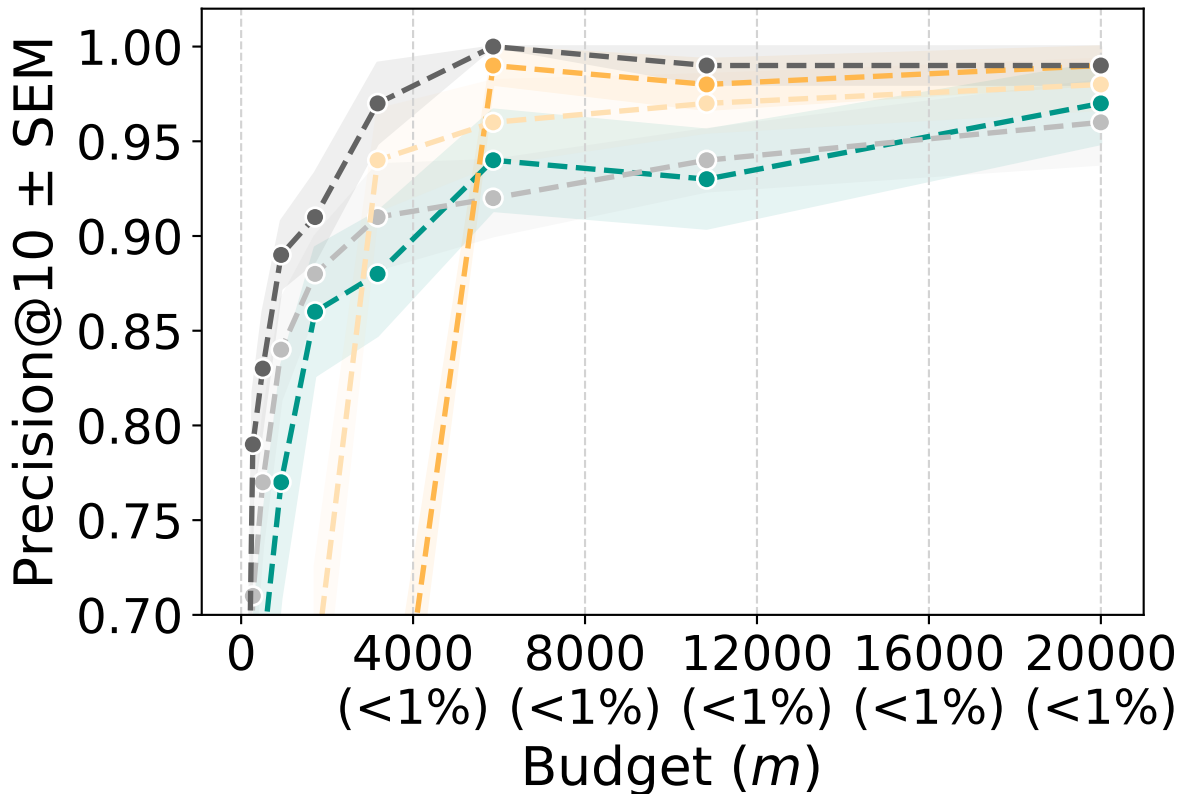

Supplement: supplementary_material [file nhanesi_random_forest_Precision@10_standard.pdf › shapiq/experiments/plots/pathdependent/nhanesi_random_forest_Precision@10_standard.pdf]

# NHANES ( $d = 79$ )

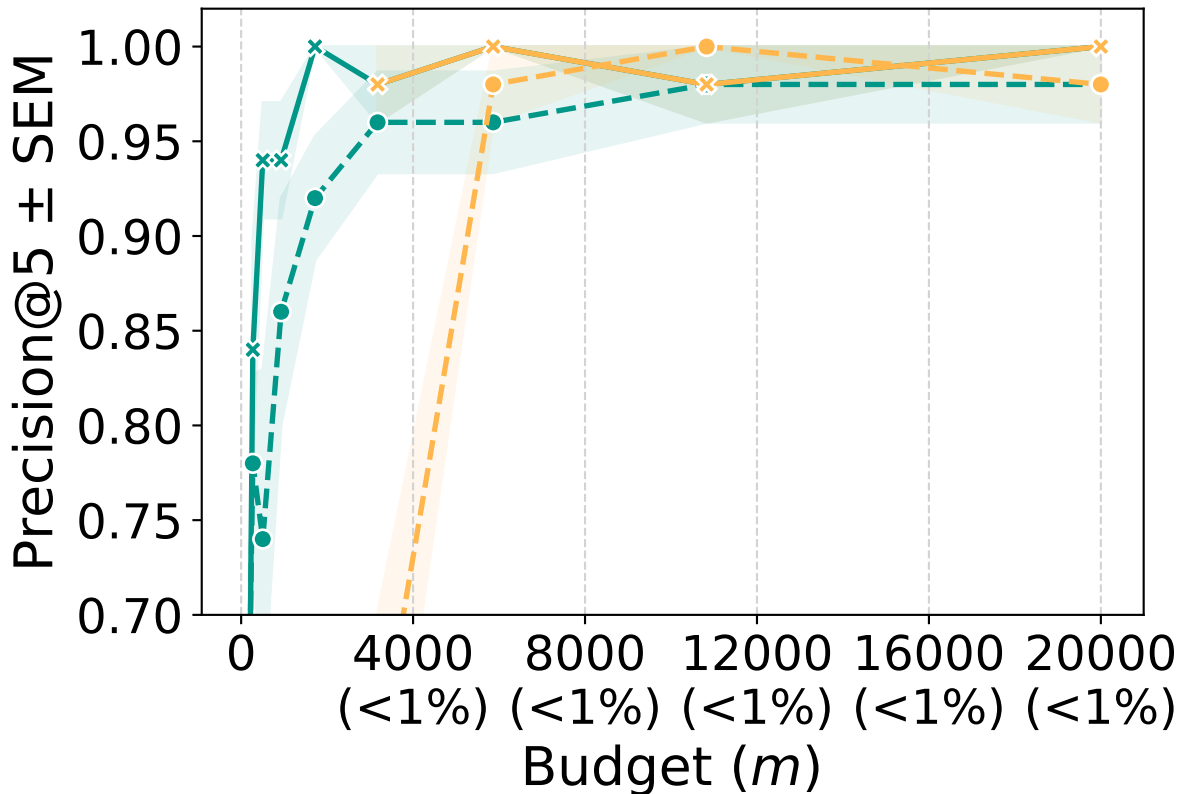

Supplement: supplementary_material [file nhanesi_random_forest_Precision@5_paired_vs_standard.pdf › shapiq/experiments/plots/pathdependent/nhanesi_random_forest_Precision@5_paired_vs_standard.pdf]

# NHANES ( $d = 79$ )

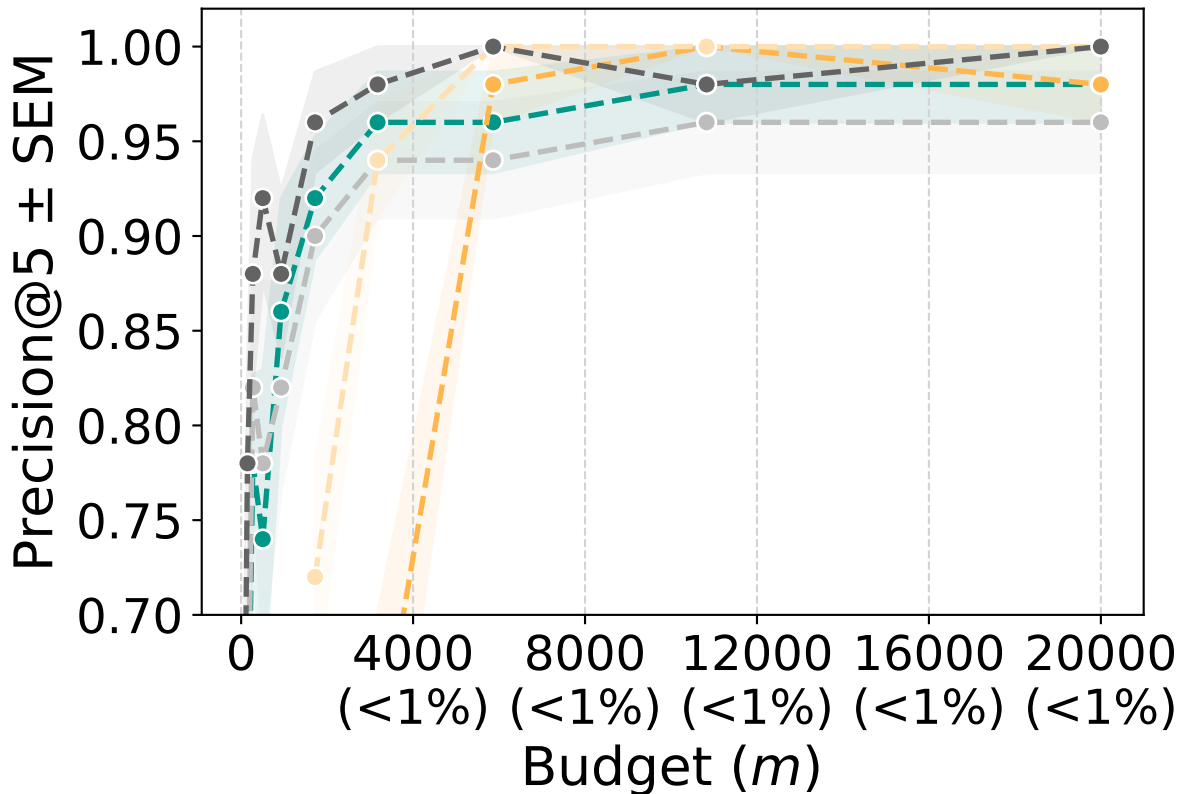

Supplement: supplementary_material [file nhanesi_random_forest_Precision@5_standard.pdf › shapiq/experiments/plots/pathdependent/nhanesi_random_forest_Precision@5_standard.pdf]

# NHANES ( $d = 79$ )

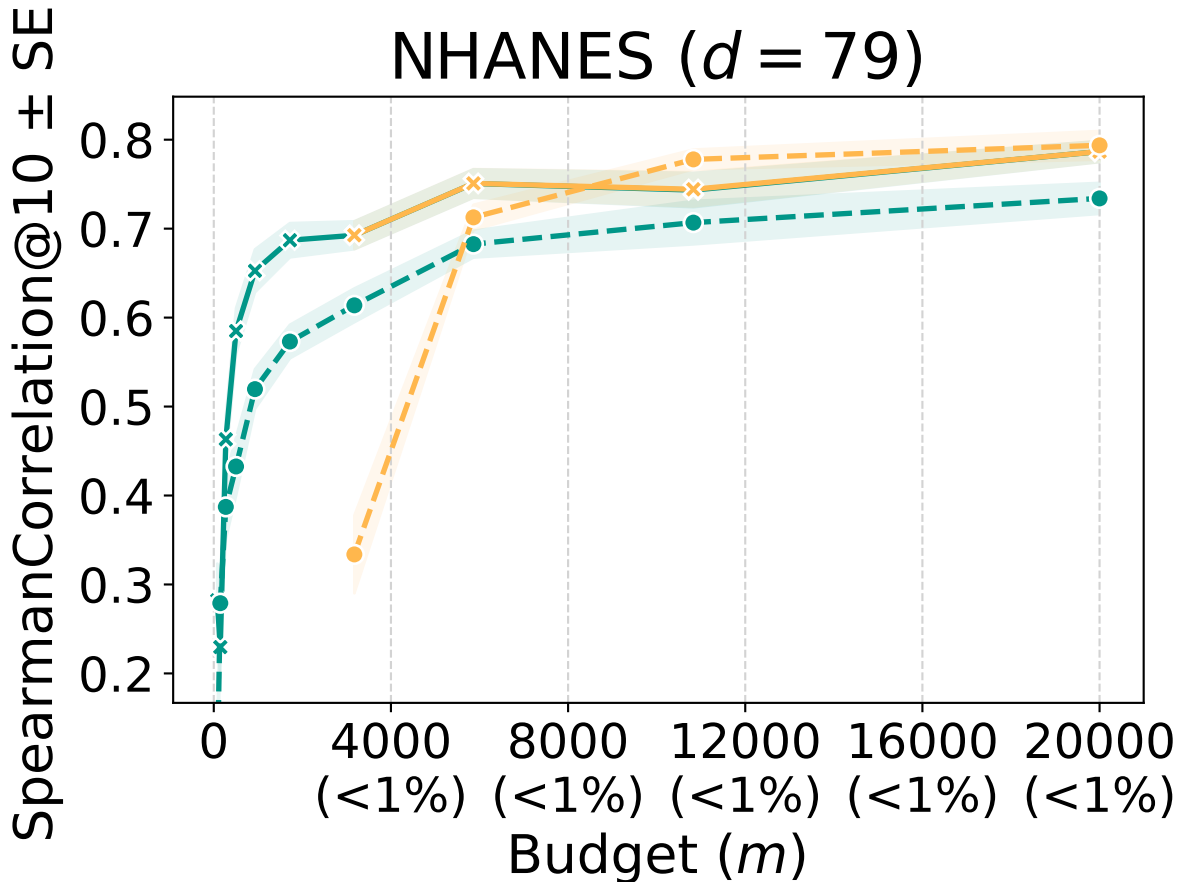

Supplement: supplementary_material [file nhanesi_random_forest_SpearmanCorrelation@10_paired_vs_standard.pdf › shapiq/experiments/plots/pathdependent/nhanesi_random_forest_SpearmanCorrelation@10_paired_vs_standard.pdf]

# NHANES ( $d = 79$ )

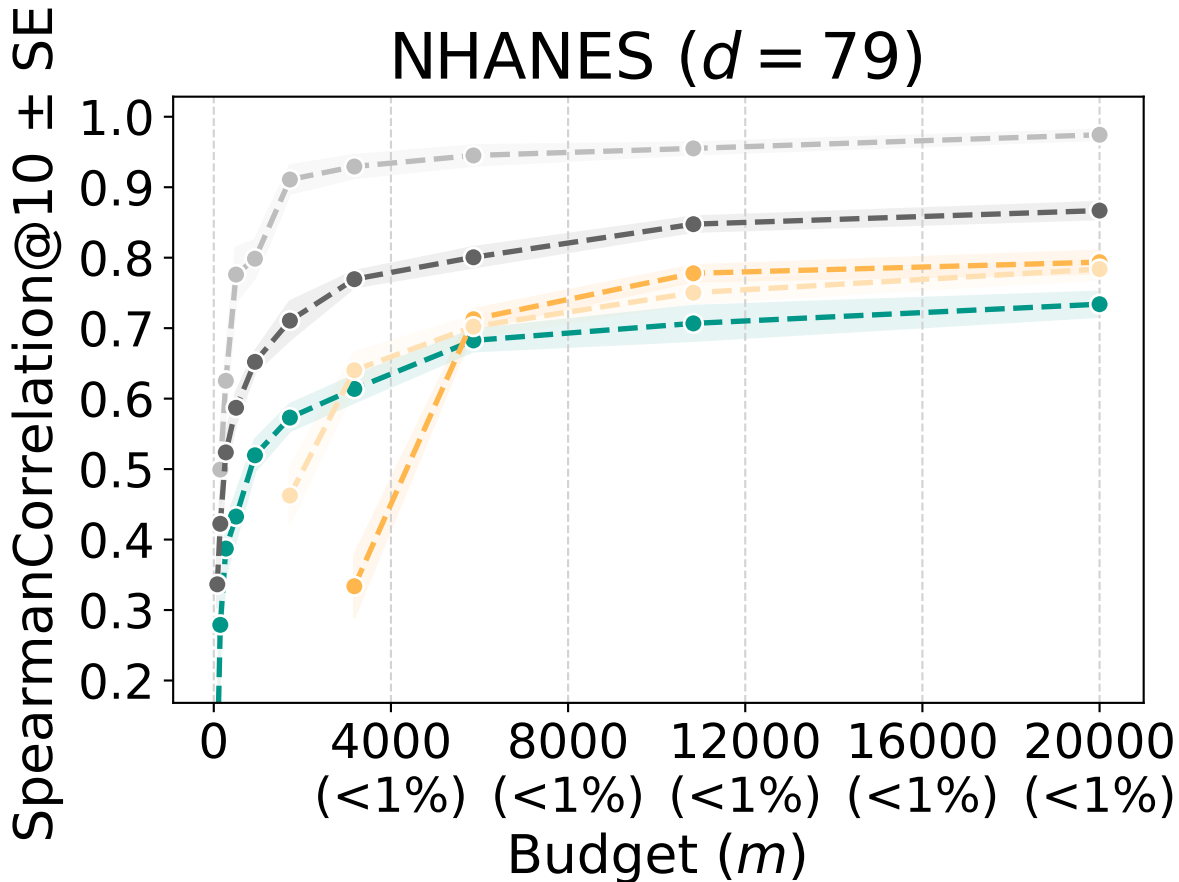

Supplement: supplementary_material [file nhanesi_random_forest_SpearmanCorrelation@10_standard.pdf › shapiq/experiments/plots/pathdependent/nhanesi_random_forest_SpearmanCorrelation@10_standard.pdf]

# NHANES ( $d = 79$ )

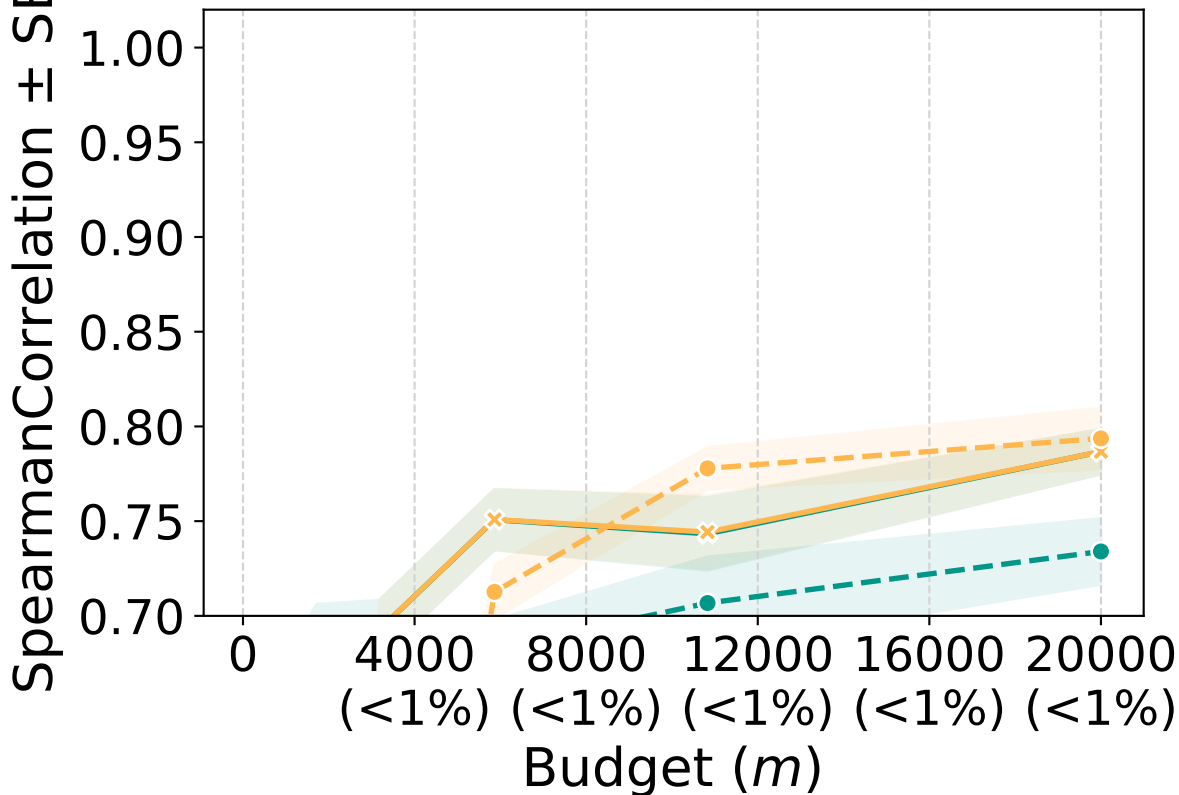

Supplement: supplementary_material [file nhanesi_random_forest_SpearmanCorrelation_paired_vs_standard.pdf › shapiq/experiments/plots/pathdependent/nhanesi_random_forest_SpearmanCorrelation_paired_vs_standard.pdf]

# NHANES ( $d = 79$ )

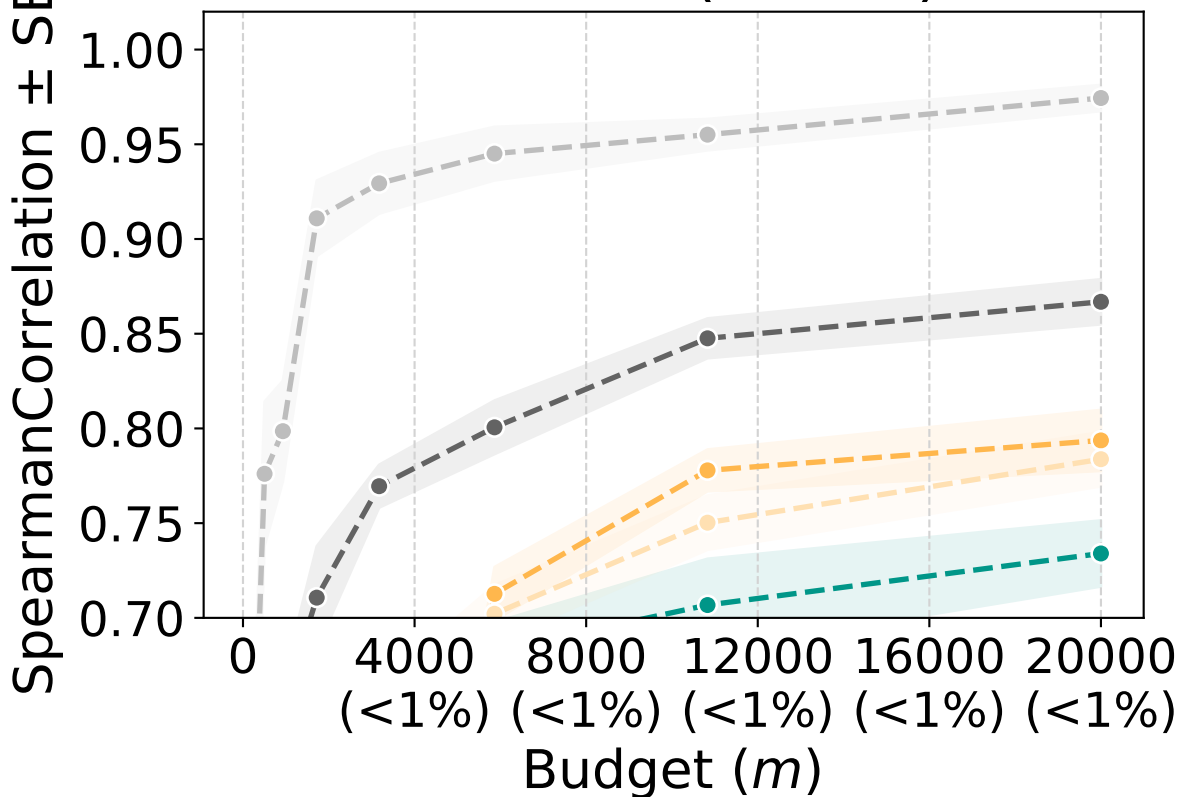

Supplement: supplementary_material [file nhanesi_random_forest_SpearmanCorrelation_standard.pdf › shapiq/experiments/plots/pathdependent/nhanesi_random_forest_SpearmanCorrelation_standard.pdf]

# Estate ( $d = 15$ )

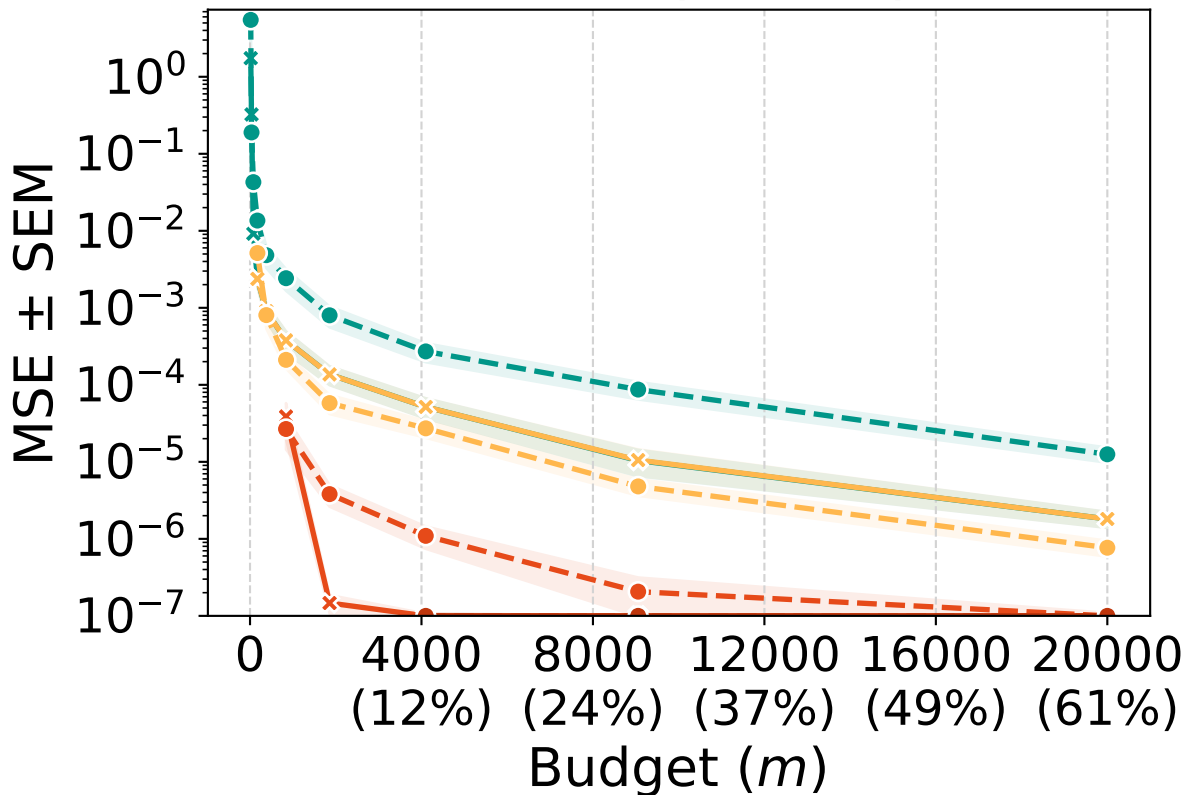

Supplement: supplementary_material [file real_estate_random_forest_MSE_paired_vs_standard.pdf › shapiq/experiments/plots/pathdependent/real_estate_random_forest_MSE_paired_vs_standard.pdf]

# Estate ( $d = 15$ )

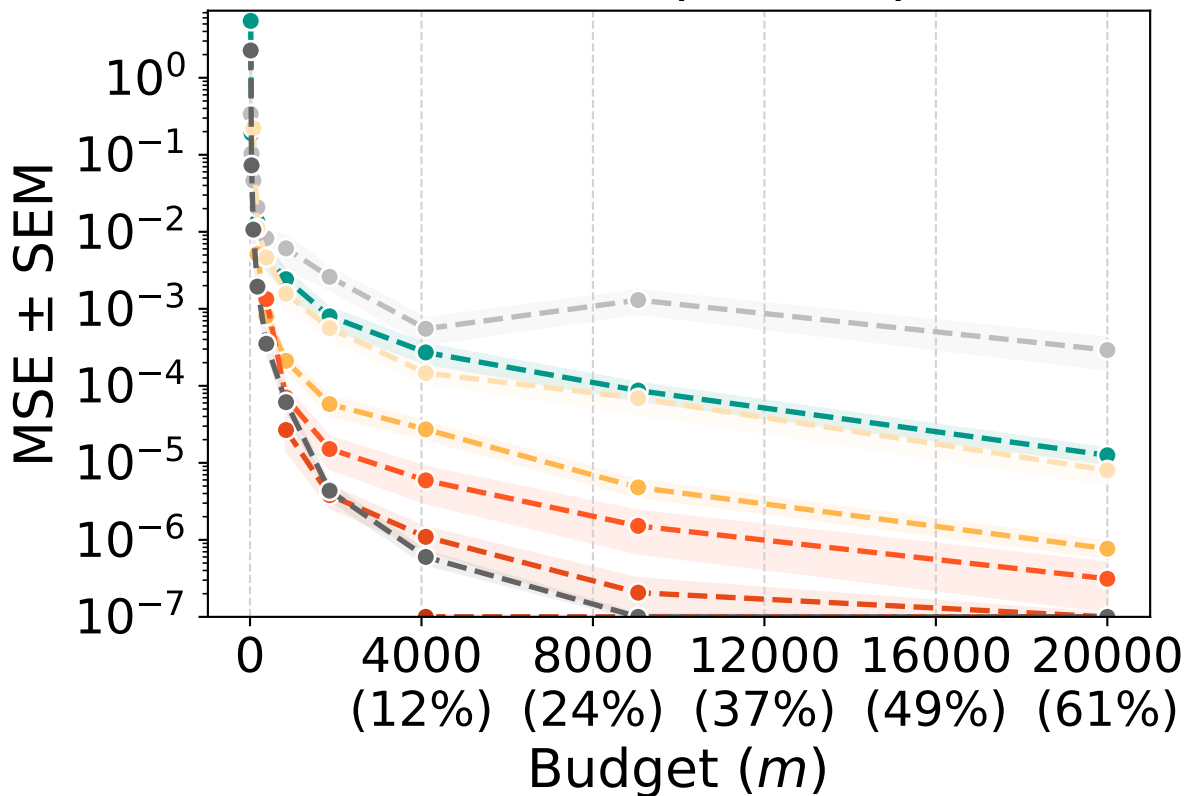

Supplement: supplementary_material [file real_estate_random_forest_MSE_standard.pdf › shapiq/experiments/plots/pathdependent/real_estate_random_forest_MSE_standard.pdf]

# Estate ( $d = 15$ )

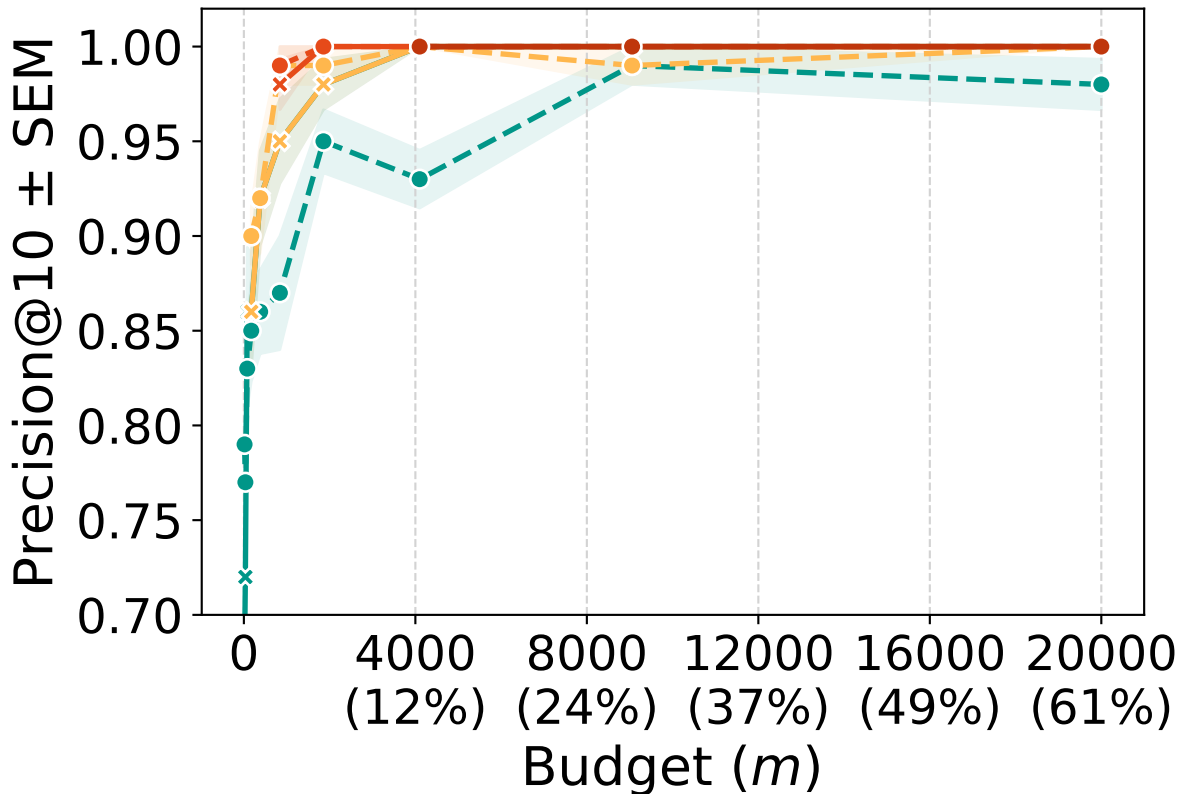

Supplement: supplementary_material [file real_estate_random_forest_Precision@10_paired_vs_standard.pdf › shapiq/experiments/plots/pathdependent/real_estate_random_forest_Precision@10_paired_vs_standard.pdf]

# Estate ( $d = 15$ )

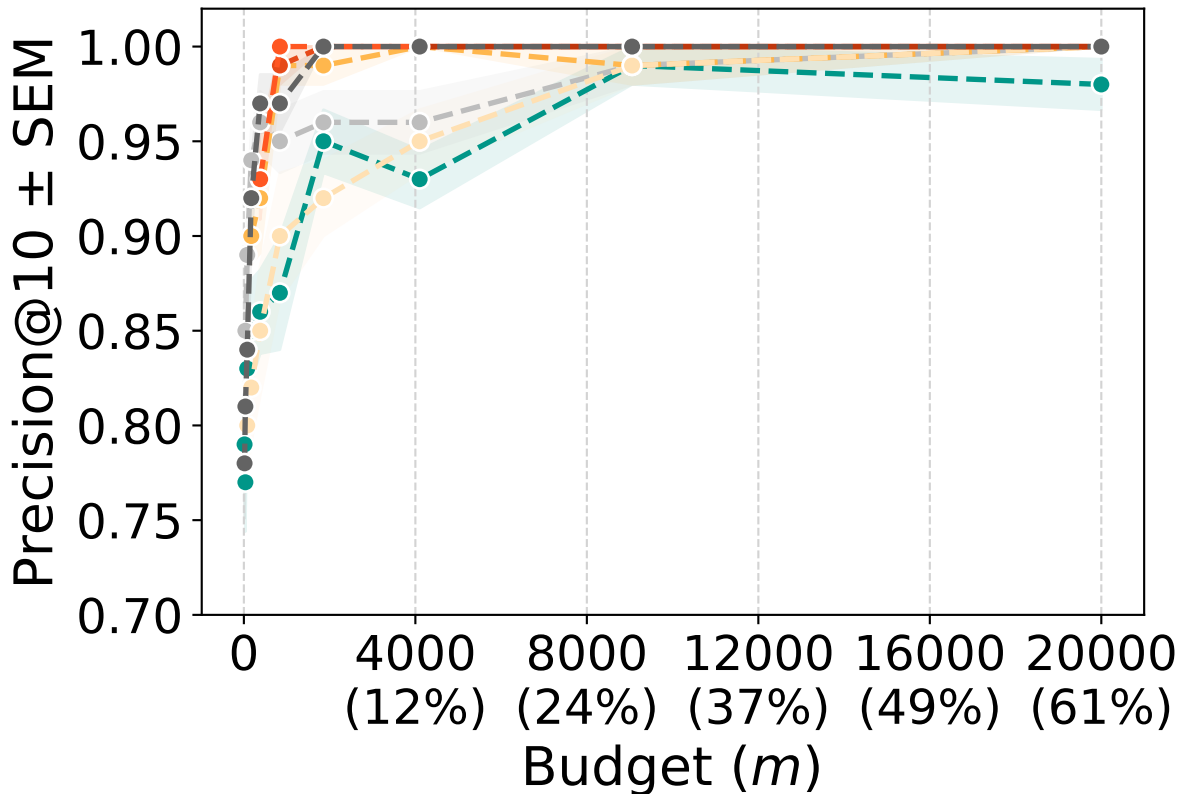

Supplement: supplementary_material [file real_estate_random_forest_Precision@10_standard.pdf › shapiq/experiments/plots/pathdependent/real_estate_random_forest_Precision@10_standard.pdf]

# Estate ( $d = 15$ )

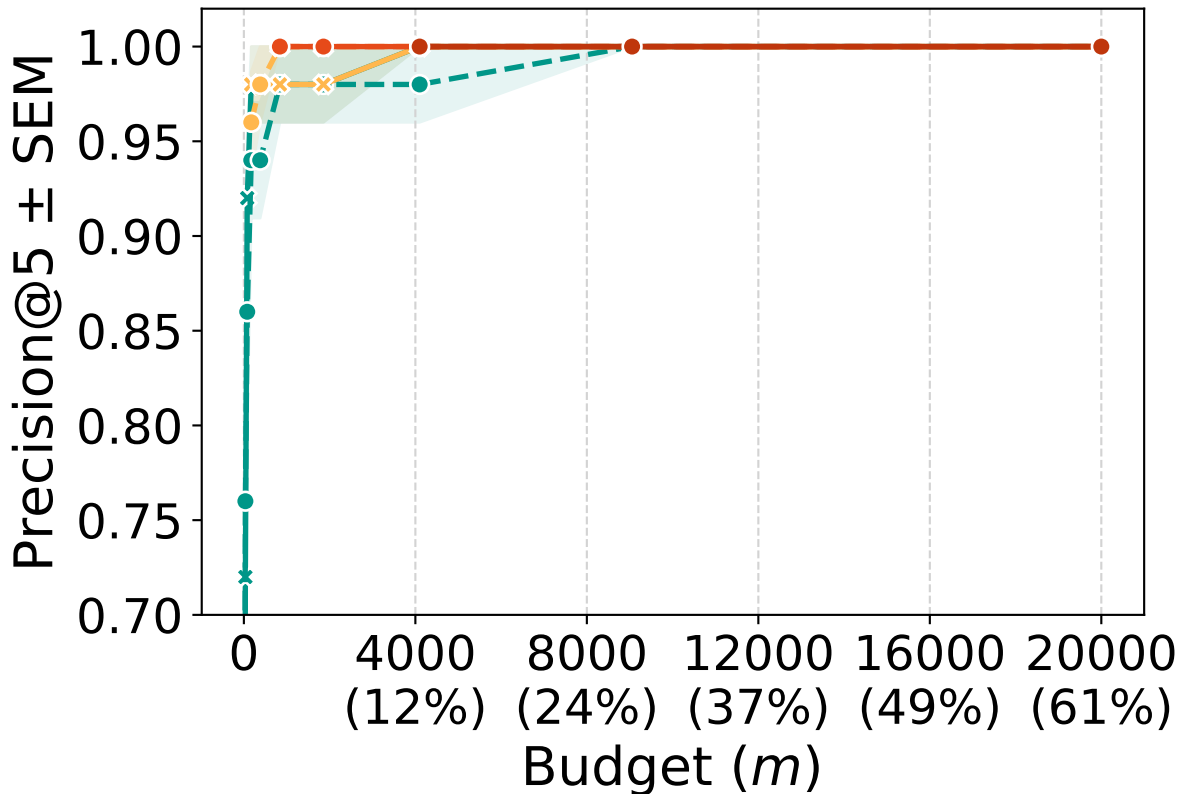

Supplement: supplementary_material [file real_estate_random_forest_Precision@5_paired_vs_standard.pdf › shapiq/experiments/plots/pathdependent/real_estate_random_forest_Precision@5_paired_vs_standard.pdf]

# Estate ( $d = 15$ )

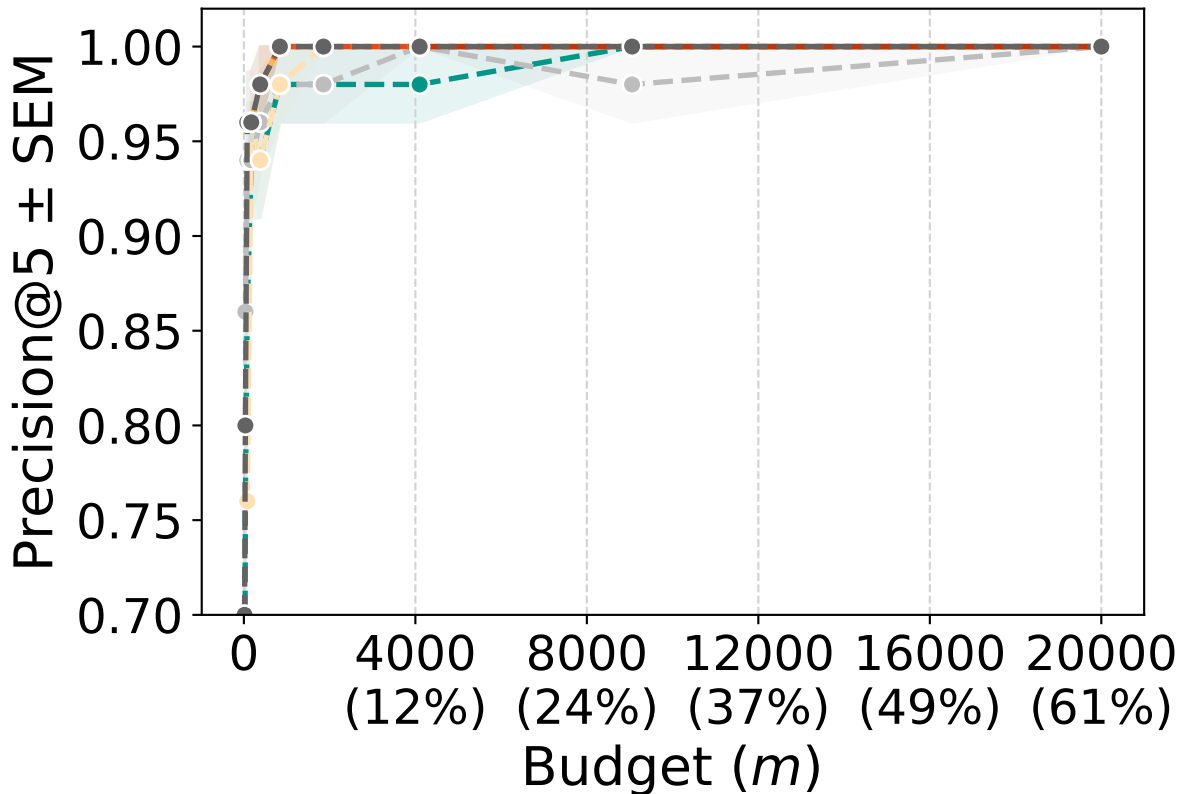

Supplement: supplementary_material [file real_estate_random_forest_Precision@5_standard.pdf › shapiq/experiments/plots/pathdependent/real_estate_random_forest_Precision@5_standard.pdf]

# Estate ( $d = 15$ )

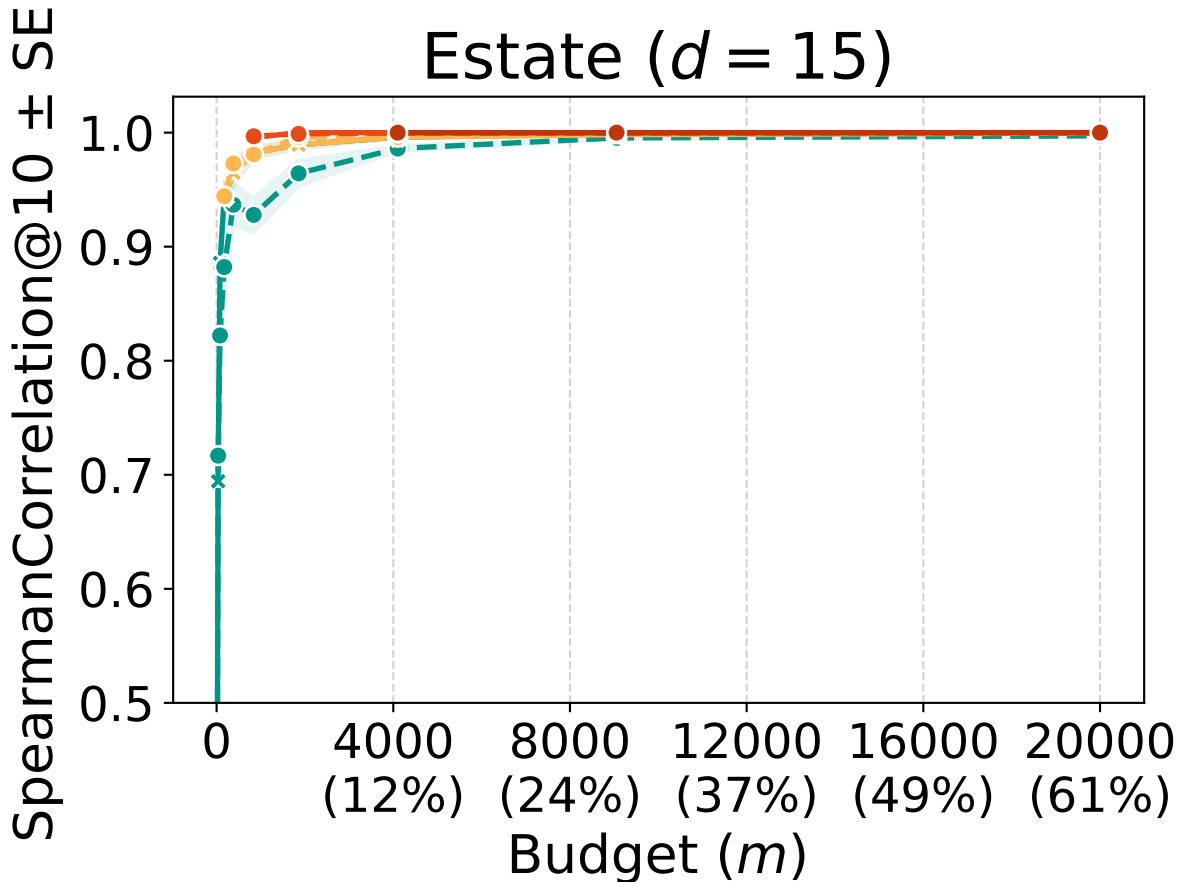

Supplement: supplementary_material [file real_estate_random_forest_SpearmanCorrelation@10_paired_vs_standard.pdf › shapiq/experiments/plots/pathdependent/real_estate_random_forest_SpearmanCorrelation@10_paired_vs_standard.pdf]

# Estate ( $d = 15$ )

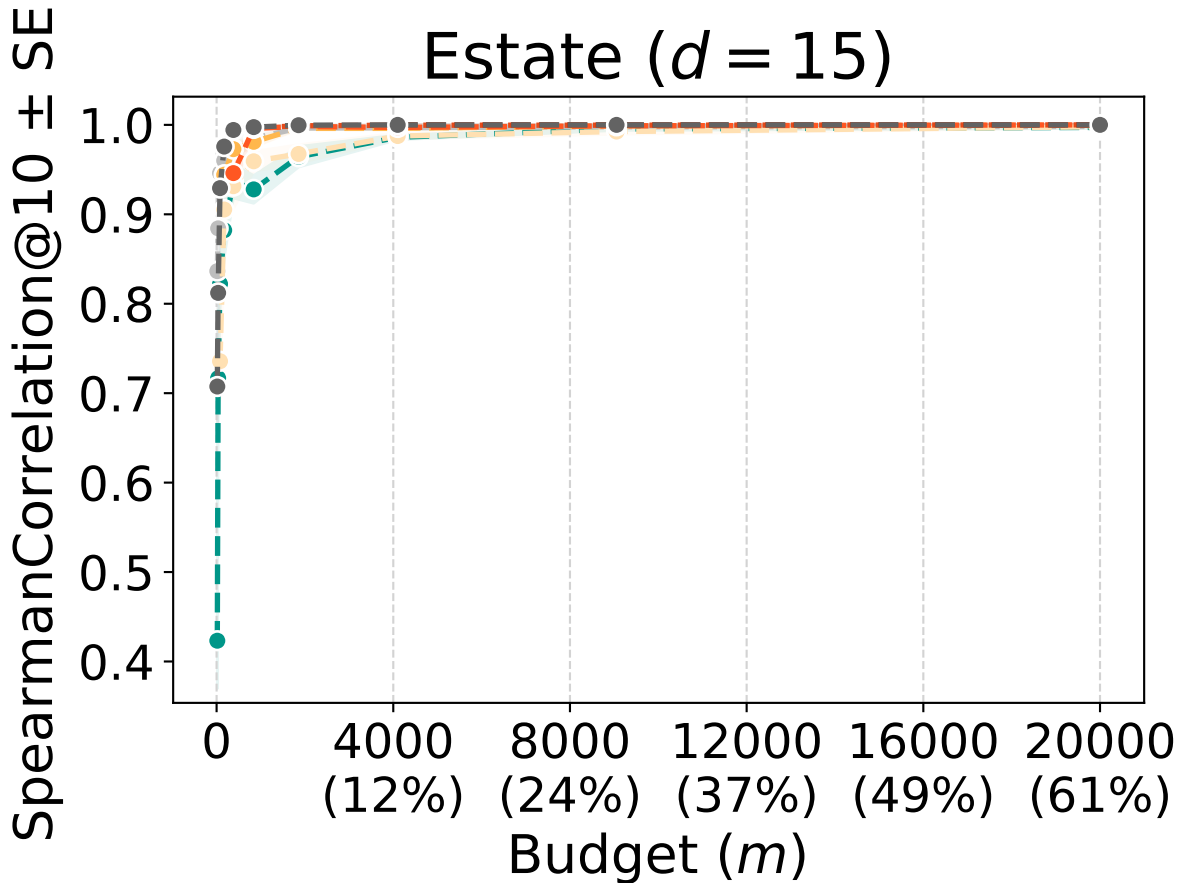

Supplement: supplementary_material [file real_estate_random_forest_SpearmanCorrelation@10_standard.pdf › shapiq/experiments/plots/pathdependent/real_estate_random_forest_SpearmanCorrelation@10_standard.pdf]

# Estate ( $d = 15$ )

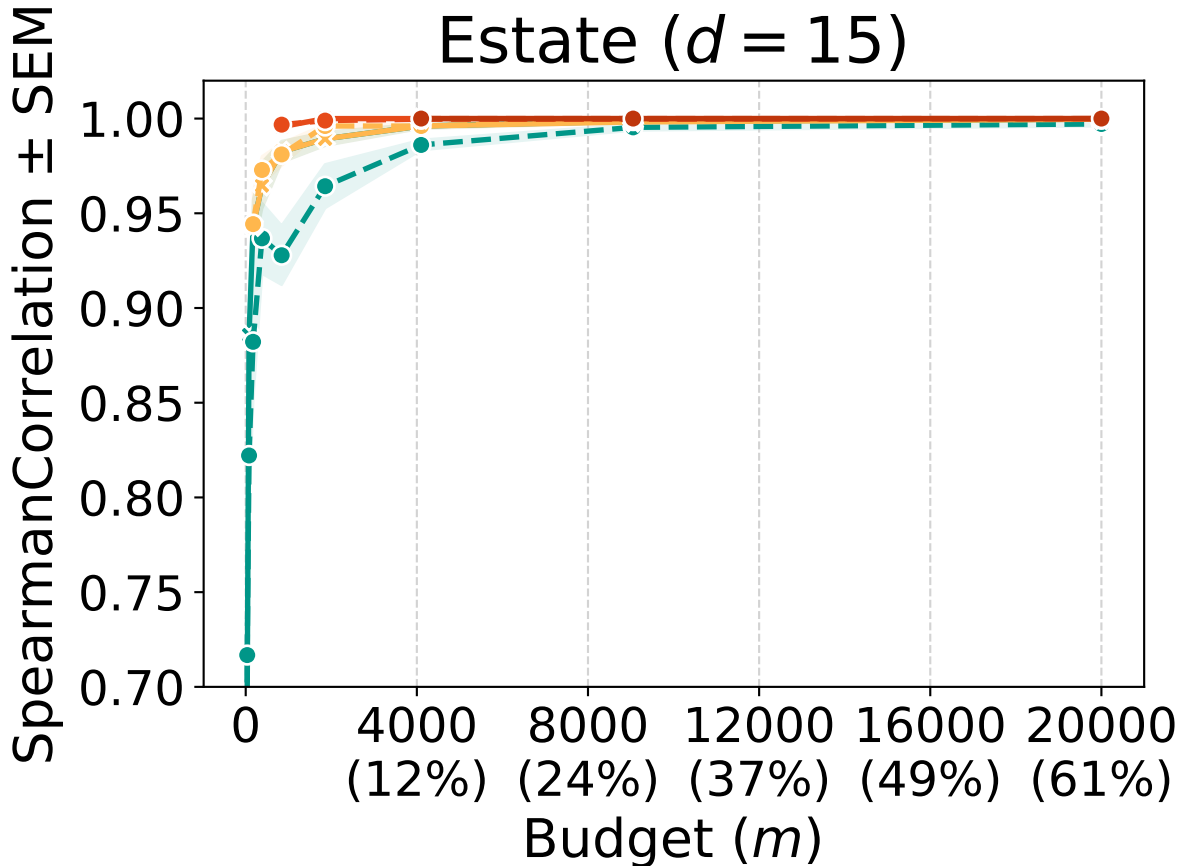

Supplement: supplementary_material [file real_estate_random_forest_SpearmanCorrelation_paired_vs_standard.pdf › shapiq/experiments/plots/pathdependent/real_estate_random_forest_SpearmanCorrelation_paired_vs_standard.pdf]

# Estate ( $d = 15$ )

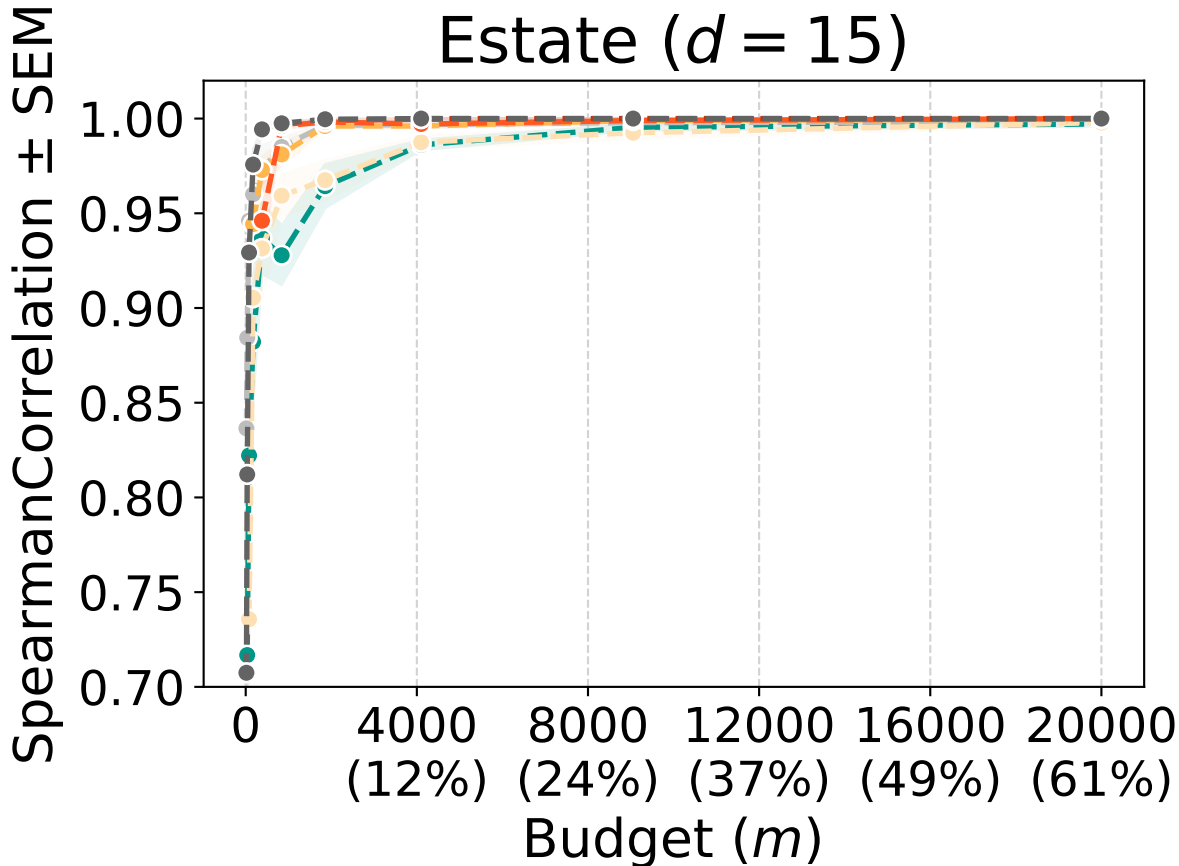

Supplement: supplementary_material [file real_estate_random_forest_SpearmanCorrelation_standard.pdf › shapiq/experiments/plots/pathdependent/real_estate_random_forest_SpearmanCorrelation_standard.pdf]

# Cancer ( $d = 30$ )

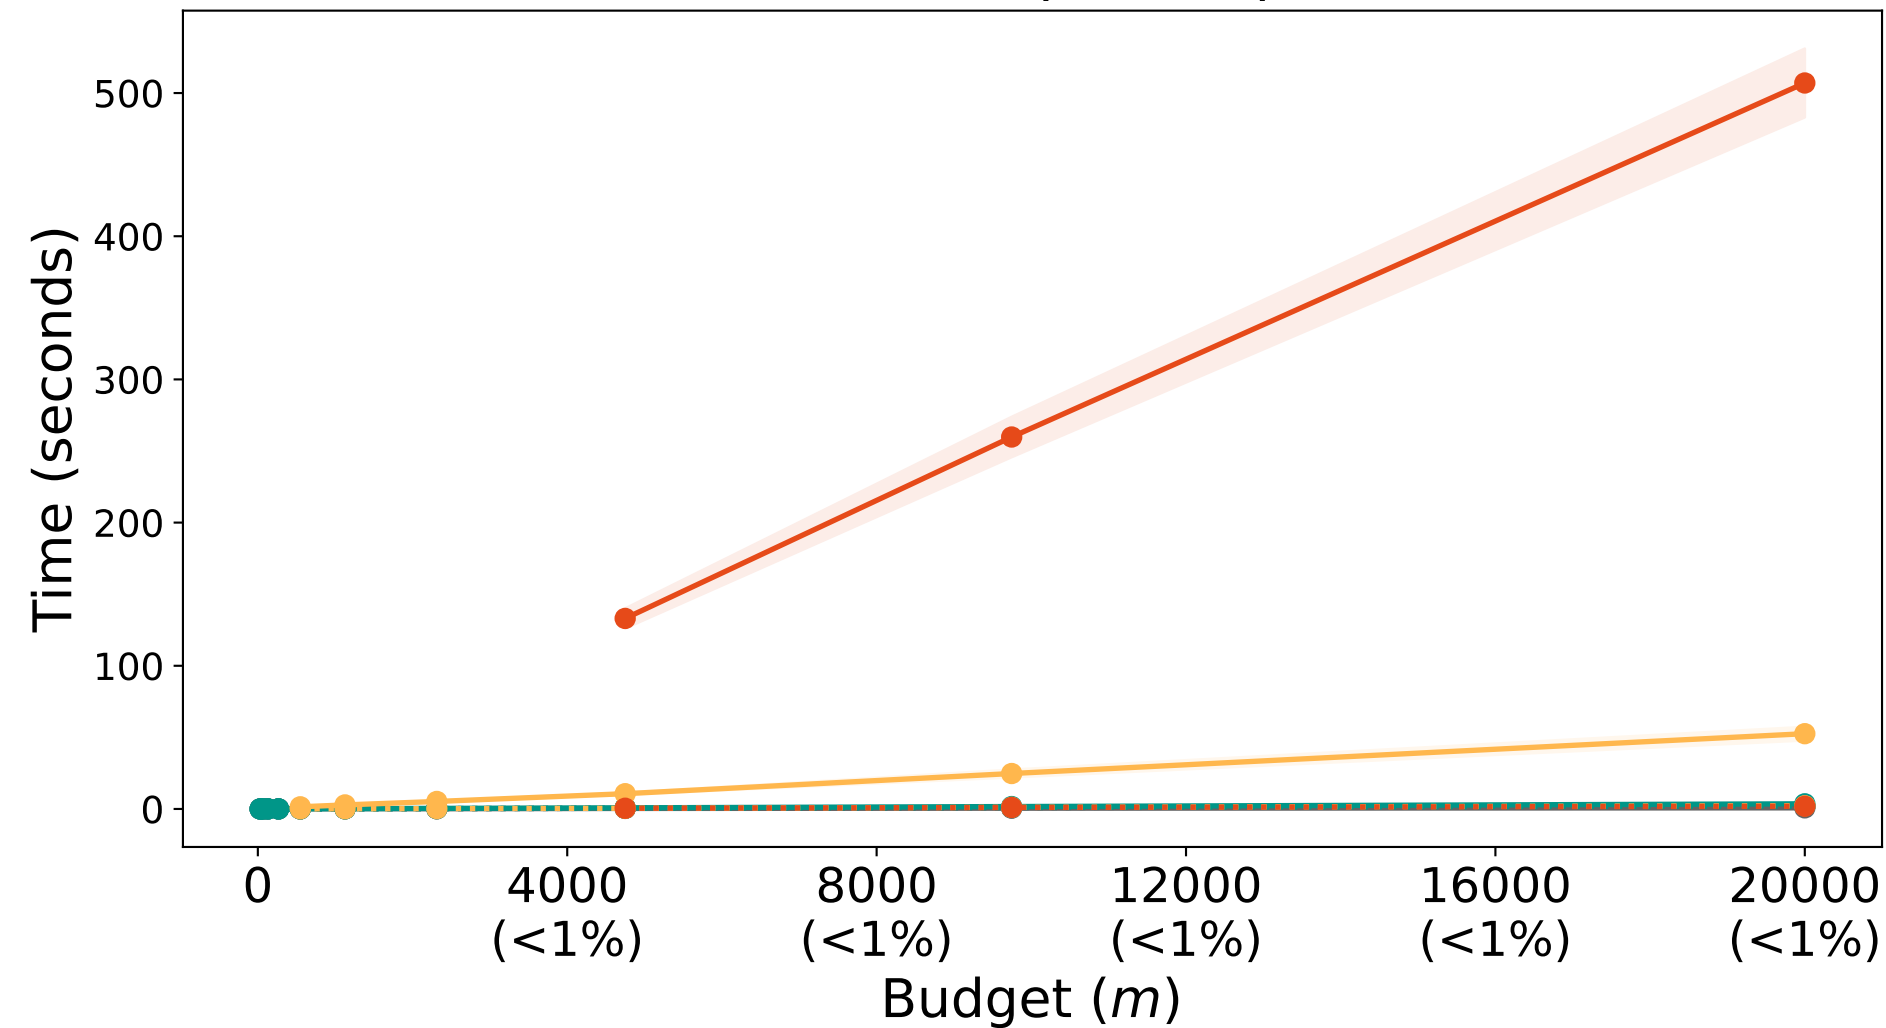

Supplement: supplementary_material [file runtime_analysis_breast_cancer_random_forest.pdf › shapiq/experiments/plots/runtime_analysis/runtime_analysis_breast_cancer_random_forest.pdf]

# Housing ( $d = 8$ )

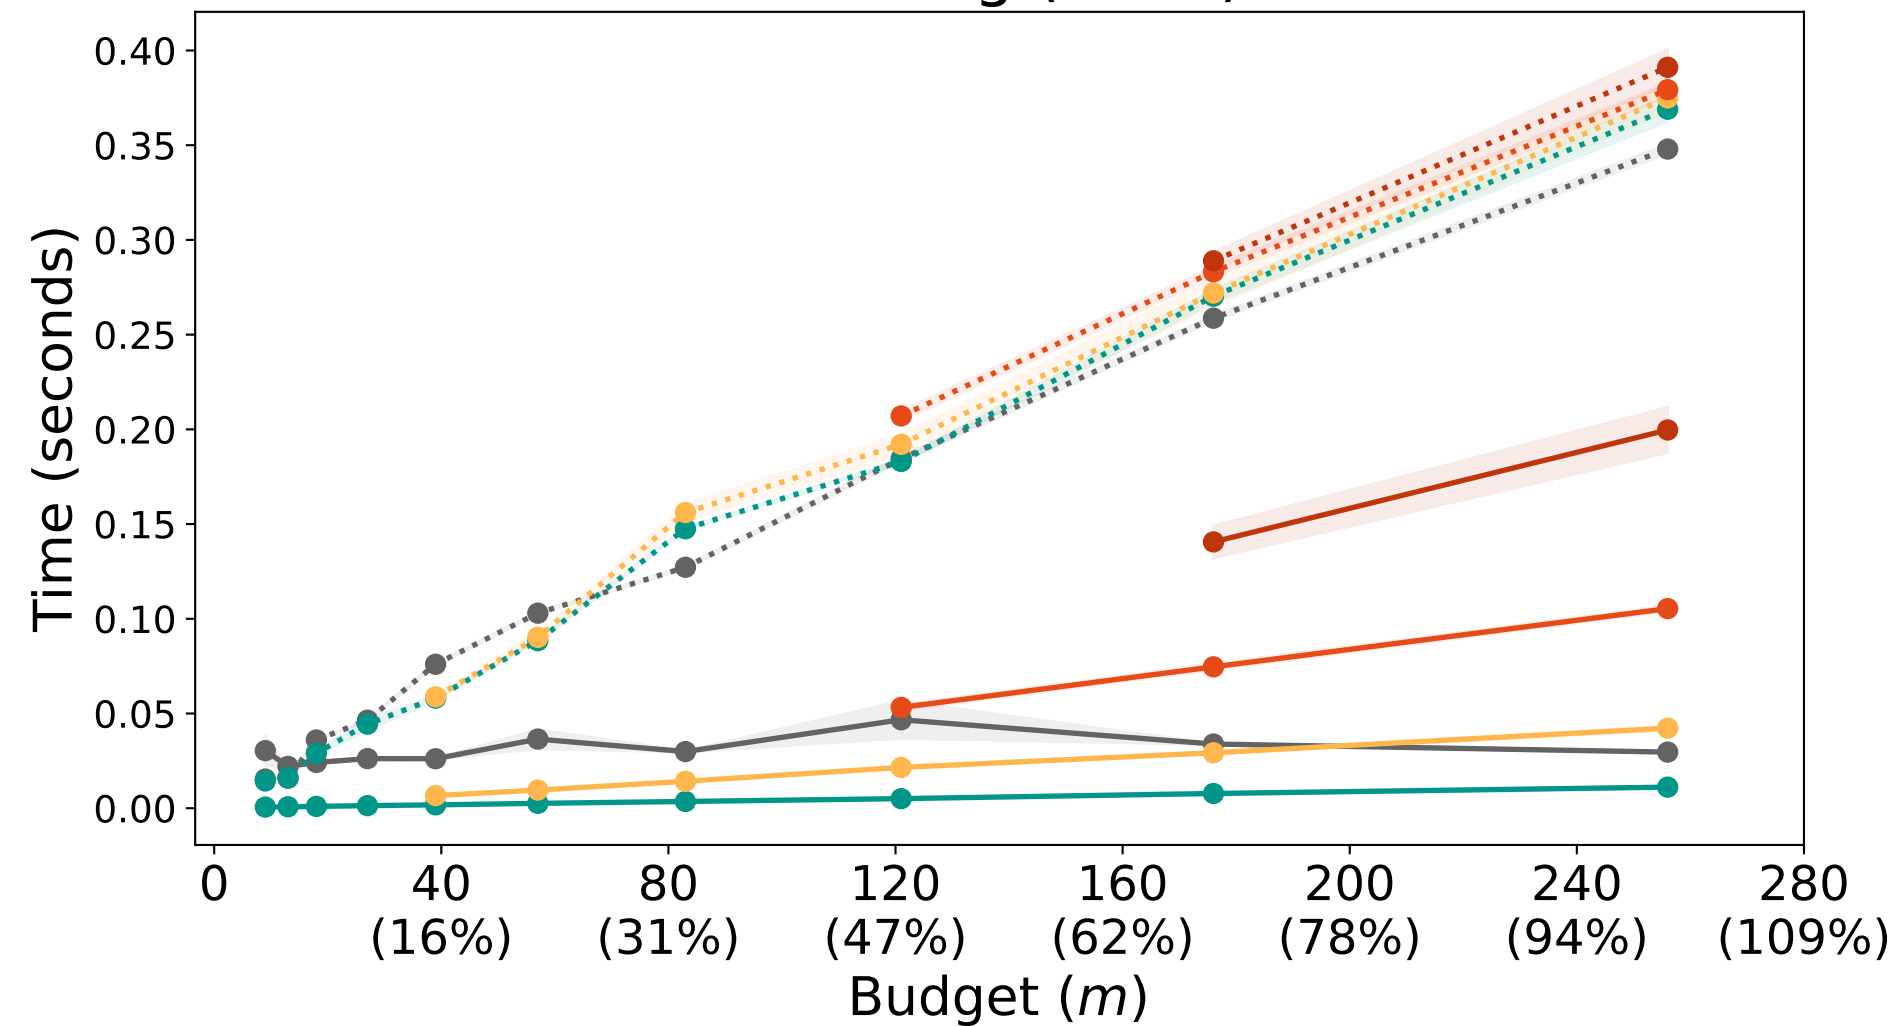

Supplement: supplementary_material [file runtime_analysis_california_housing_random_forest.pdf › shapiq/experiments/plots/runtime_analysis/runtime_analysis_california_housing_random_forest.pdf]

# IL60 ( $d = 60$ )

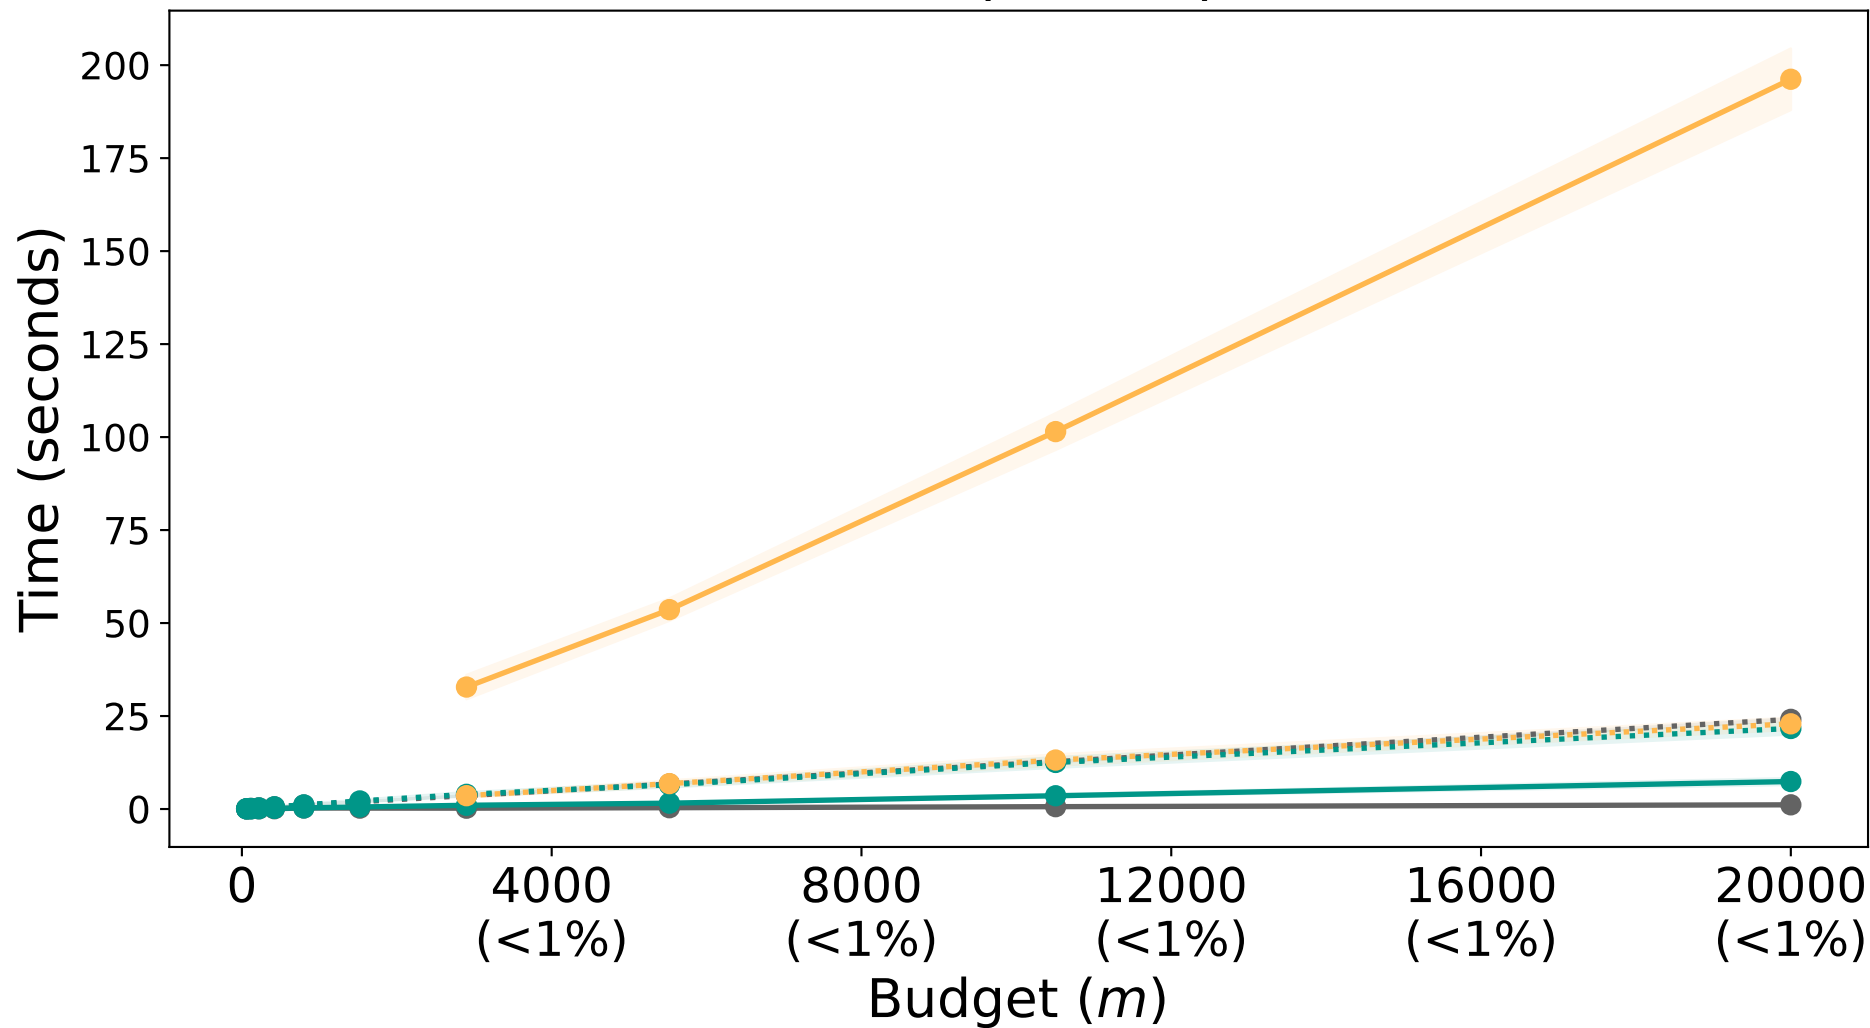

Supplement: supplementary_material [file runtime_analysis_independentlinear60_random_forest.pdf › shapiq/experiments/plots/runtime_analysis/runtime_analysis_independentlinear60_random_forest.pdf]

# Estate ( $d = 15$ )

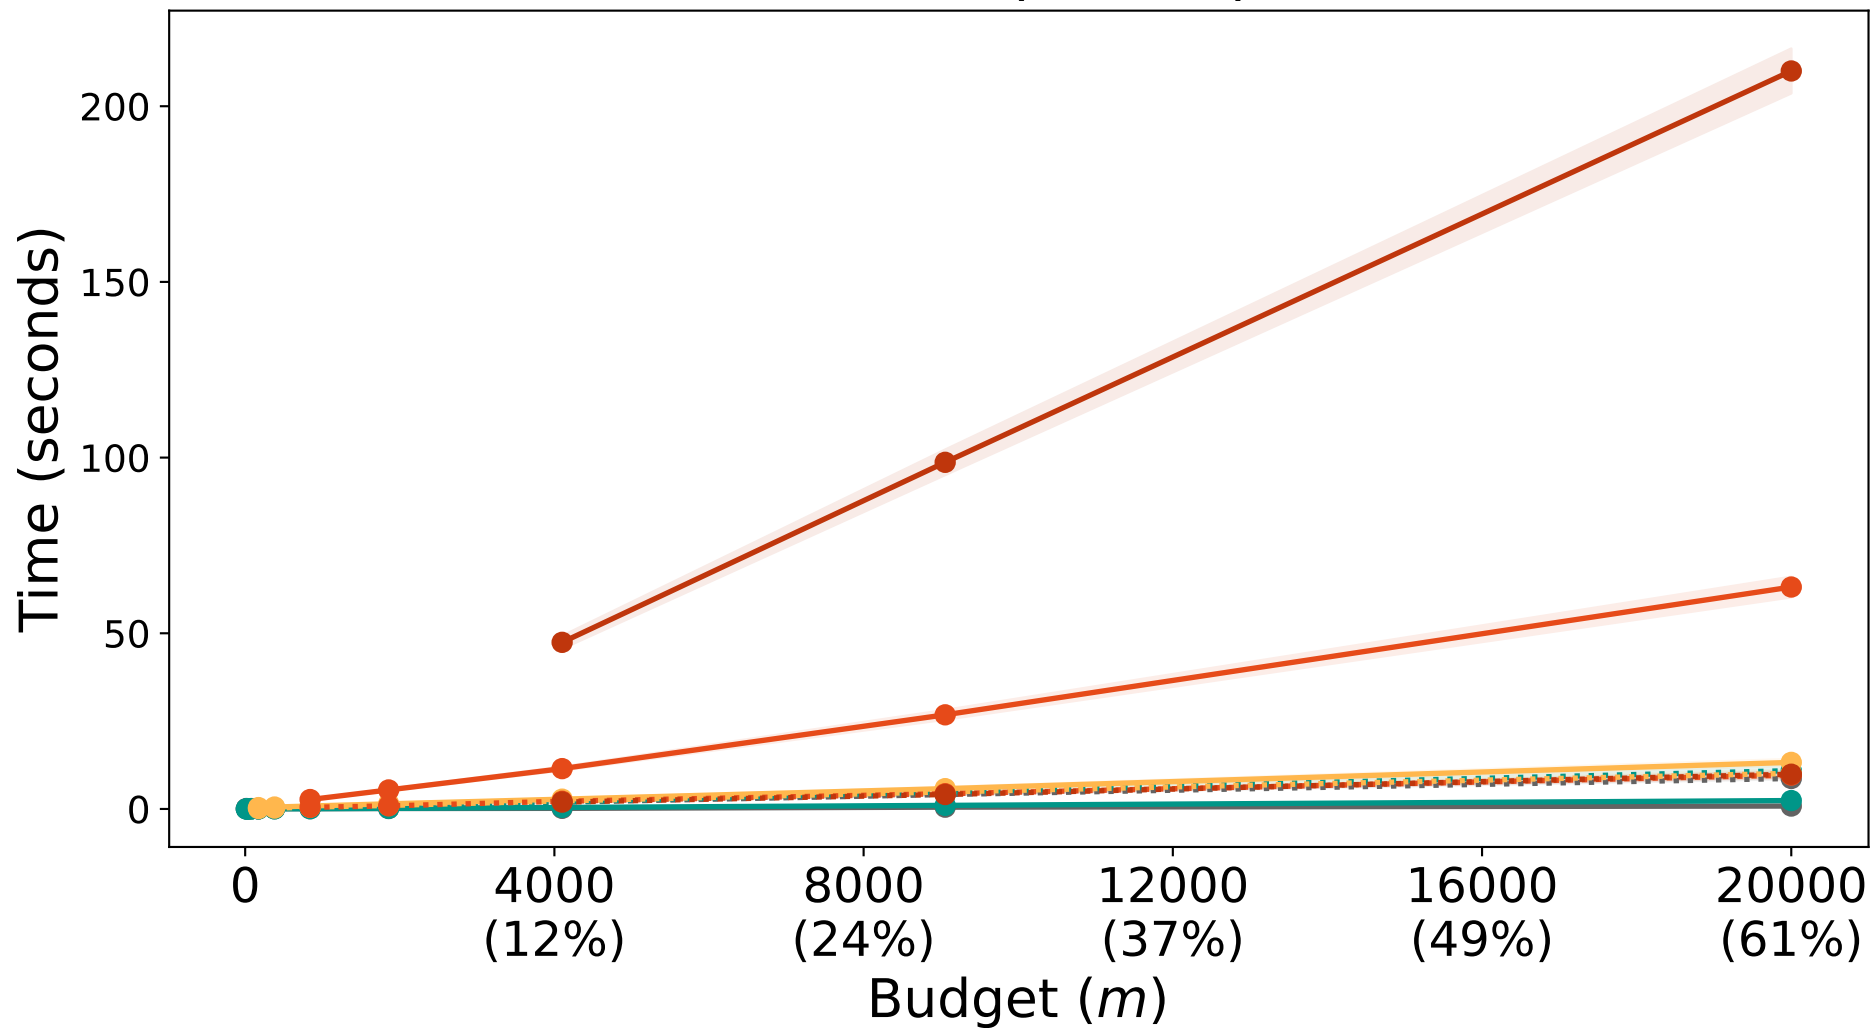

Supplement: supplementary_material [file runtime_analysis_real_estate_random_forest.pdf › shapiq/experiments/plots/runtime_analysis/runtime_analysis_real_estate_random_forest.pdf]
