# Supplementary material (part 1 of 2)
Source: ML conference proceedings conference paper supplement (https://openreview.net/forum?id=M19J8UGguq)

# ResNet18 ( $d = 14$ )

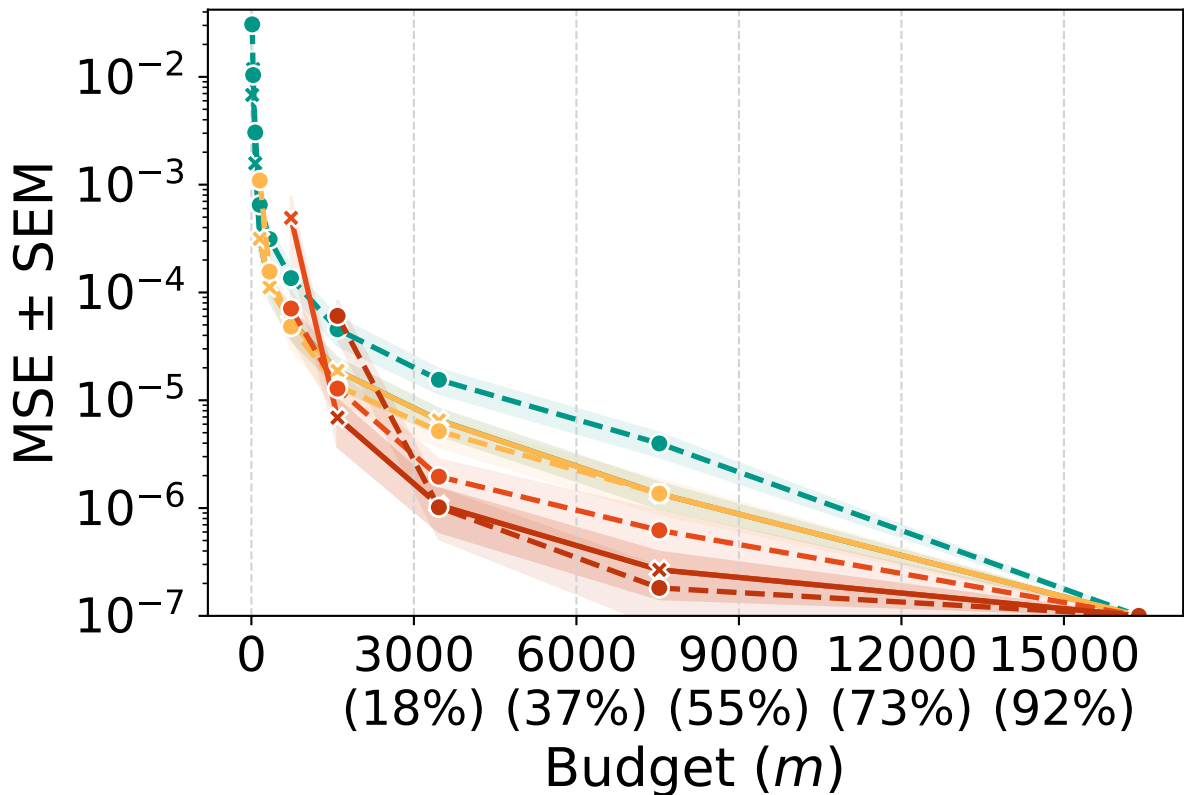

Supplement: supplementary_material [file ResNet18w14Superpixel_1_MSE_paired_vs_standard.pdf › shapiq/experiments/plots/exhaustive/ResNet18w14Superpixel_1_MSE_paired_vs_standard.pdf]

# ResNet18 ( $d = 14$ )

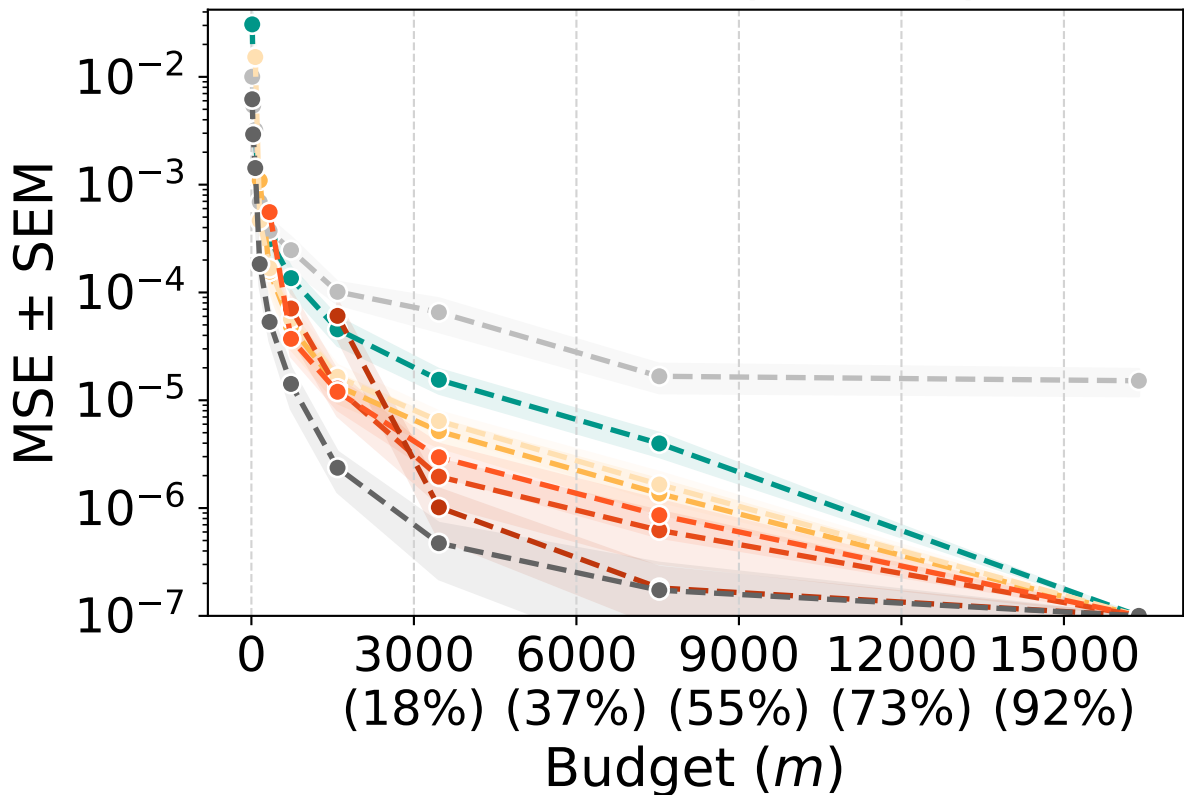

Supplement: supplementary_material [file ResNet18w14Superpixel_1_MSE_standard.pdf › shapiq/experiments/plots/exhaustive/ResNet18w14Superpixel_1_MSE_standard.pdf]

# ResNet18 ( $d = 14$ )

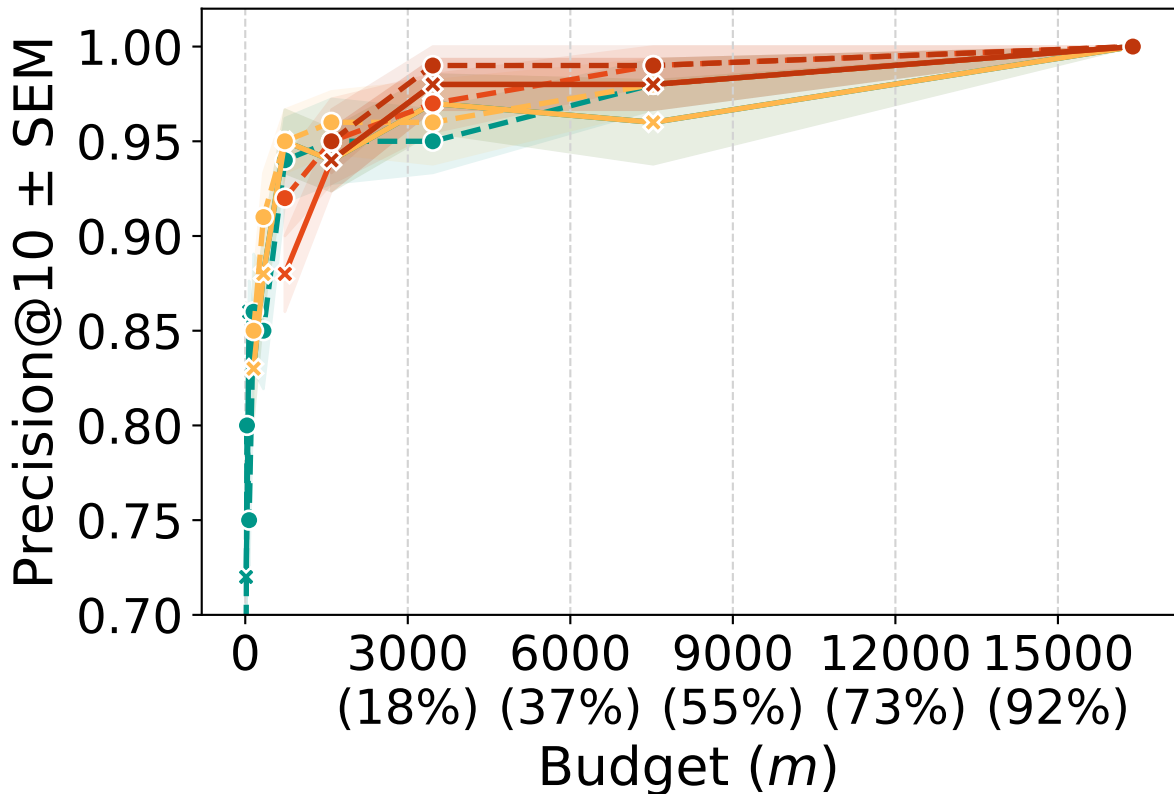

Supplement: supplementary_material [file ResNet18w14Superpixel_1_Precision@10_paired_vs_standard.pdf › shapiq/experiments/plots/exhaustive/ResNet18w14Superpixel_1_Precision@10_paired_vs_standard.pdf]

# ResNet18 ( $d = 14$ )

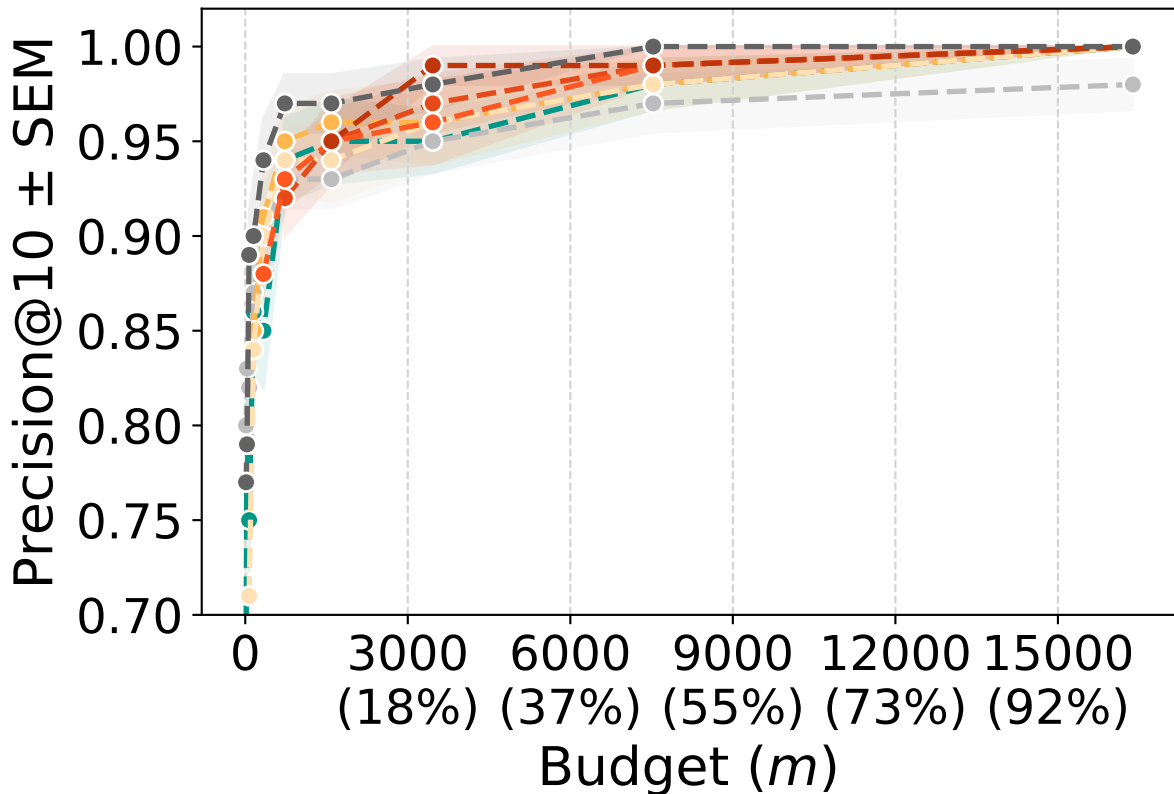

Supplement: supplementary_material [file ResNet18w14Superpixel_1_Precision@10_standard.pdf › shapiq/experiments/plots/exhaustive/ResNet18w14Superpixel_1_Precision@10_standard.pdf]

# ResNet18 ( $d = 14$ )

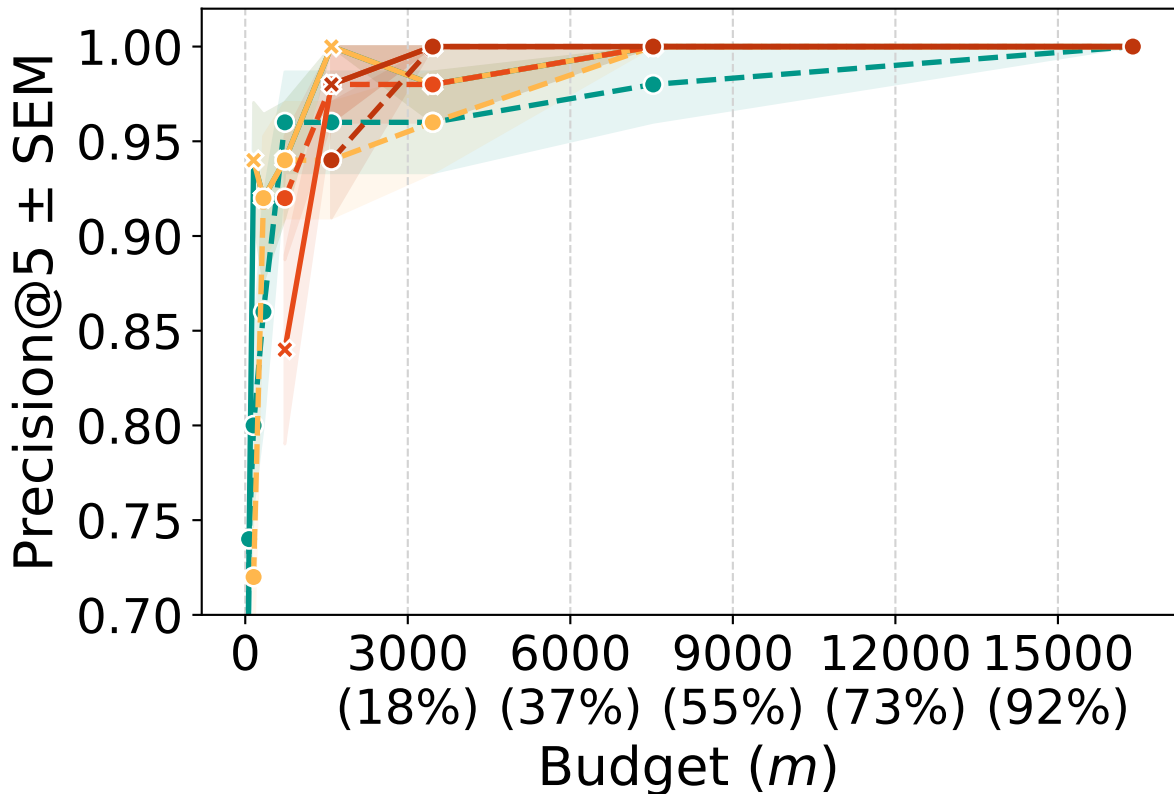

Supplement: supplementary_material [file ResNet18w14Superpixel_1_Precision@5_paired_vs_standard.pdf › shapiq/experiments/plots/exhaustive/ResNet18w14Superpixel_1_Precision@5_paired_vs_standard.pdf]

# ResNet18 ( $d = 14$ )

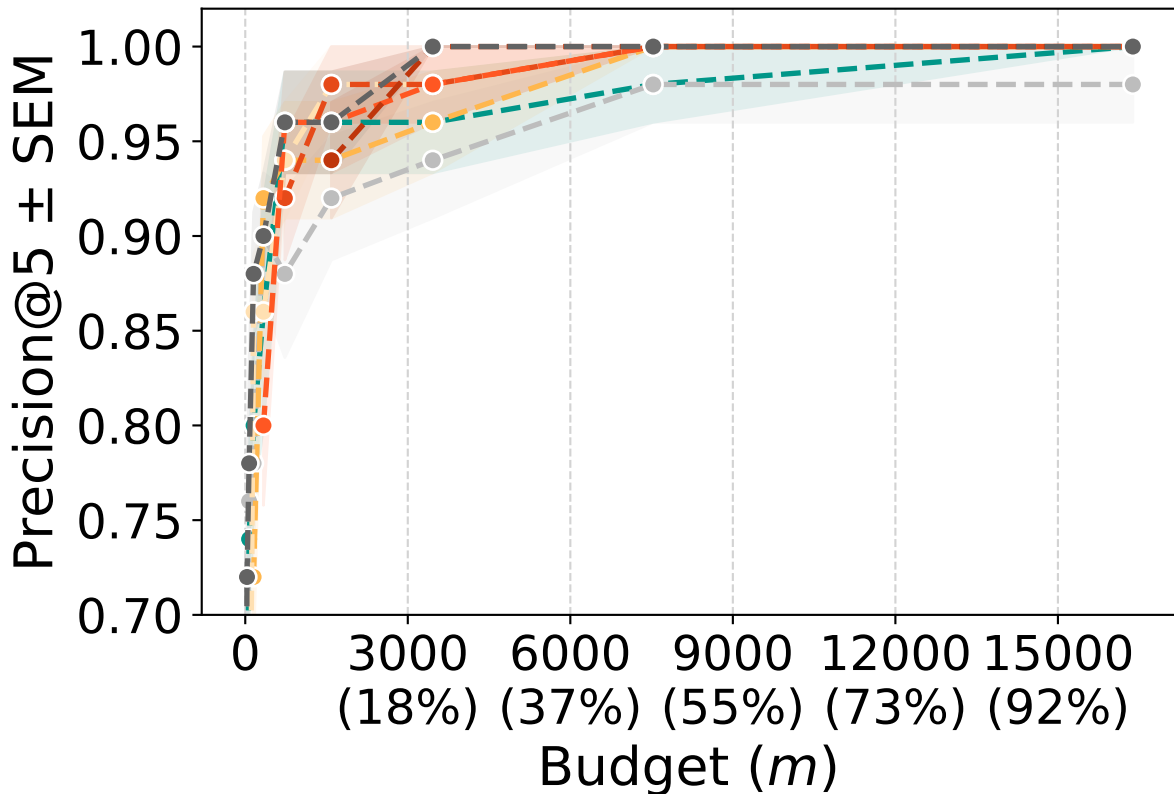

Supplement: supplementary_material [file ResNet18w14Superpixel_1_Precision@5_standard.pdf › shapiq/experiments/plots/exhaustive/ResNet18w14Superpixel_1_Precision@5_standard.pdf]

# ResNet18 ( $d = 14$ )

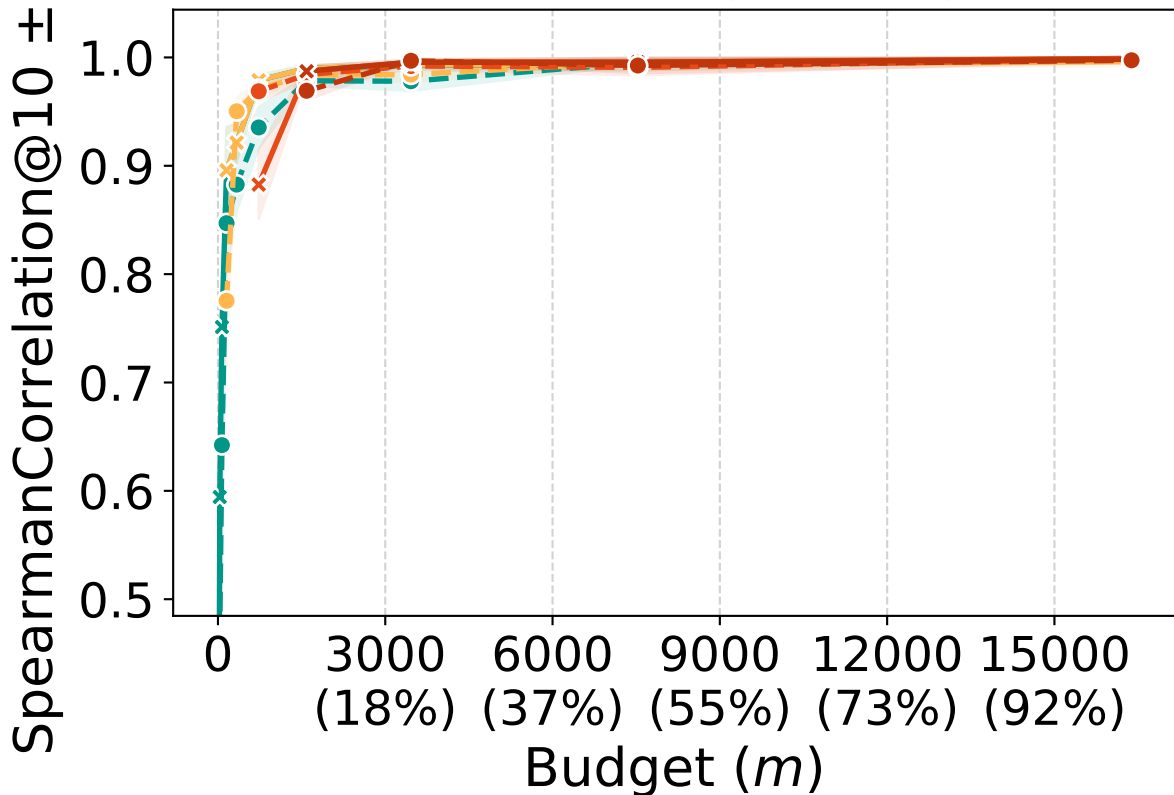

Supplement: supplementary_material [file ResNet18w14Superpixel_1_SpearmanCorrelation@10_paired_vs_standard.pdf › shapiq/experiments/plots/exhaustive/ResNet18w14Superpixel_1_SpearmanCorrelation@10_paired_vs_standard.pdf]

# ResNet18 ( $d = 14$ )

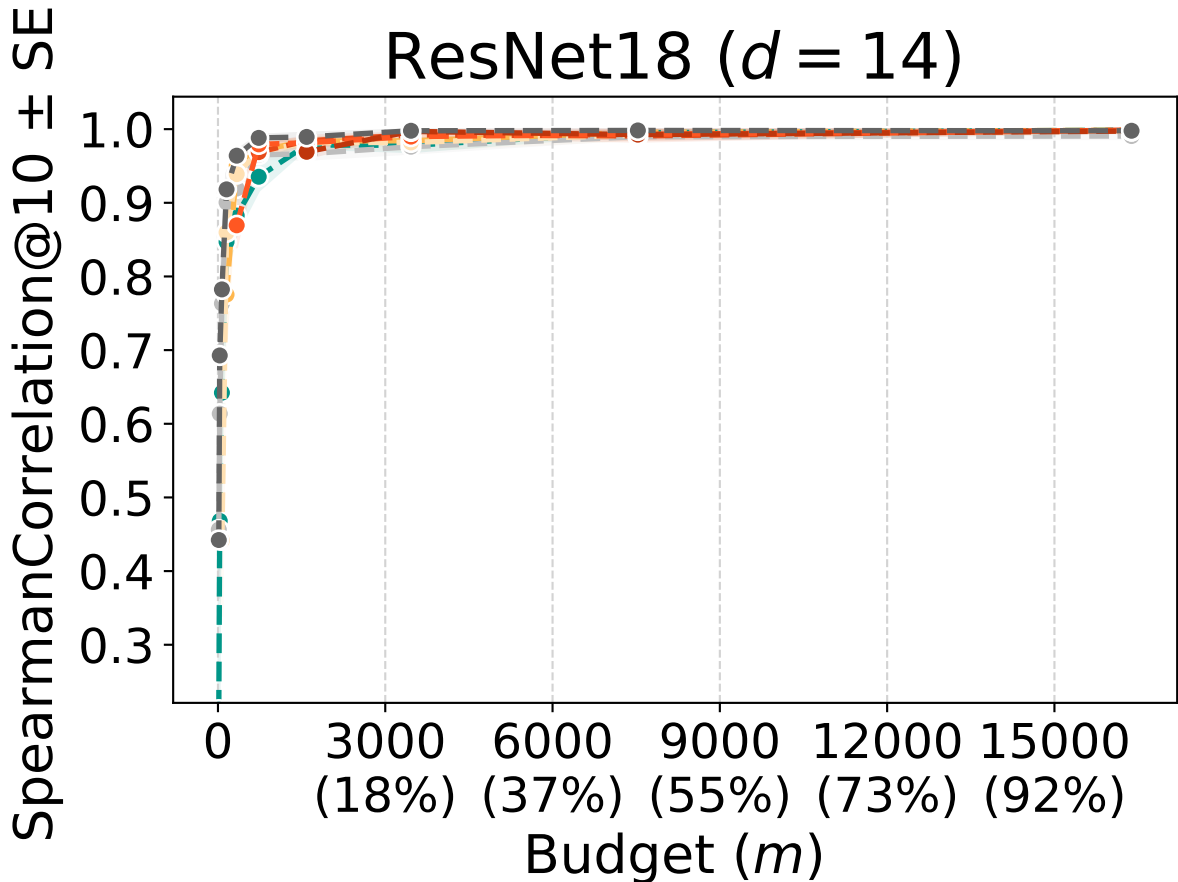

Supplement: supplementary_material [file ResNet18w14Superpixel_1_SpearmanCorrelation@10_standard.pdf › shapiq/experiments/plots/exhaustive/ResNet18w14Superpixel_1_SpearmanCorrelation@10_standard.pdf]

# ResNet18 ( $d = 14$ )

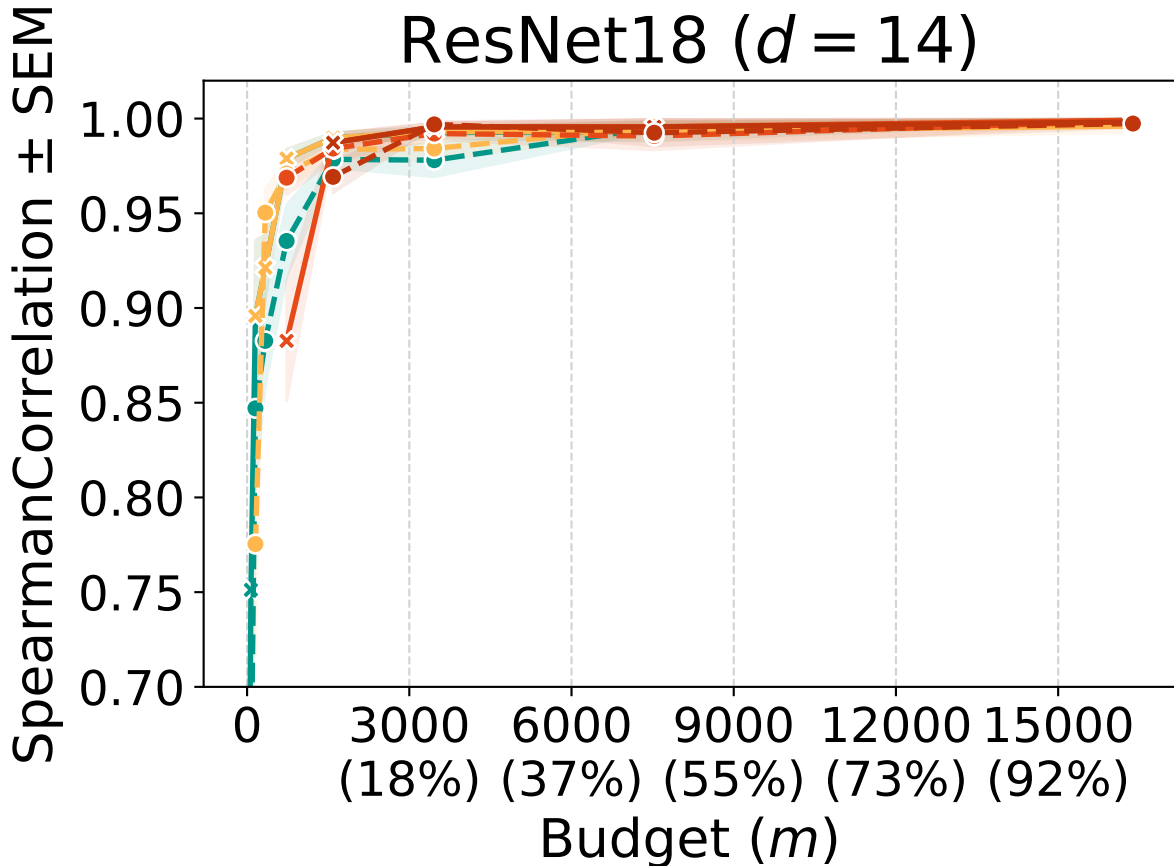

Supplement: supplementary_material [file ResNet18w14Superpixel_1_SpearmanCorrelation_paired_vs_standard.pdf › shapiq/experiments/plots/exhaustive/ResNet18w14Superpixel_1_SpearmanCorrelation_paired_vs_standard.pdf]

# ResNet18 ( $d = 14$ )

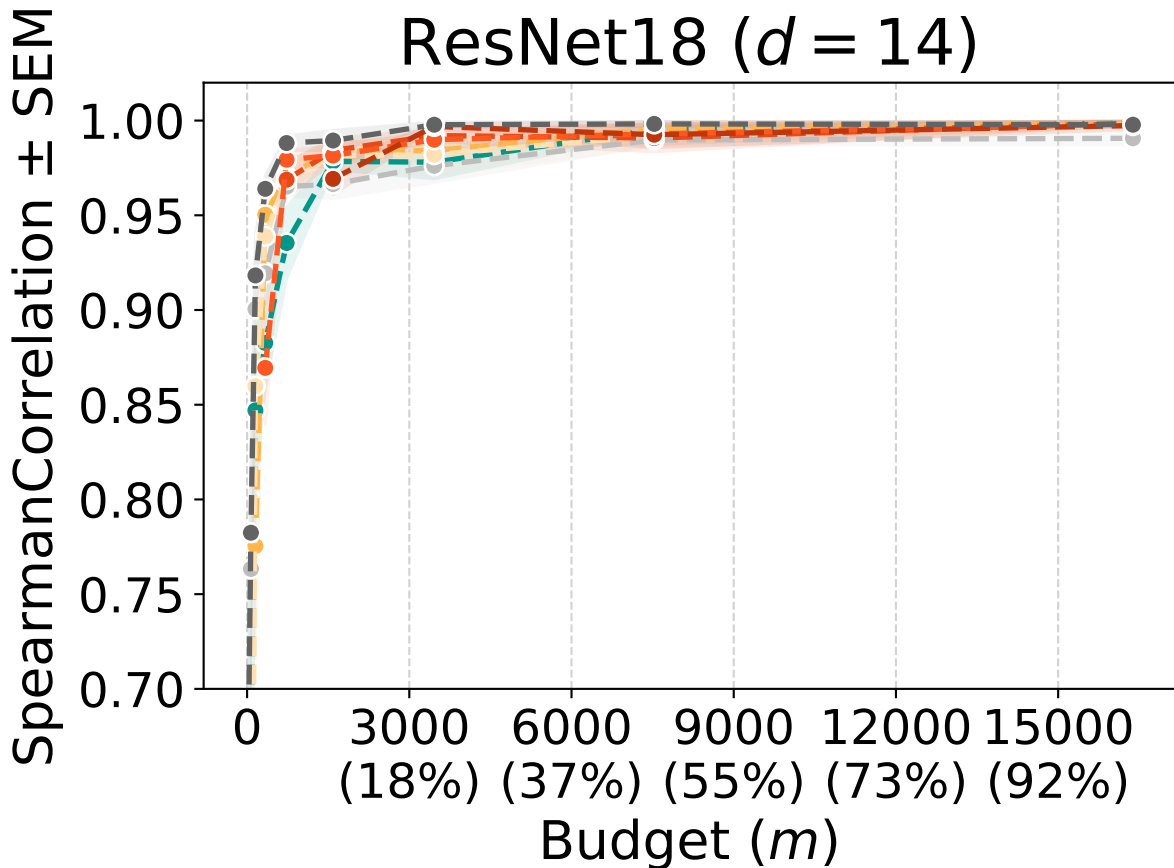

Supplement: supplementary_material [file ResNet18w14Superpixel_1_SpearmanCorrelation_standard.pdf › shapiq/experiments/plots/exhaustive/ResNet18w14Superpixel_1_SpearmanCorrelation_standard.pdf]

# DistilBERT ( $d = 14$ )

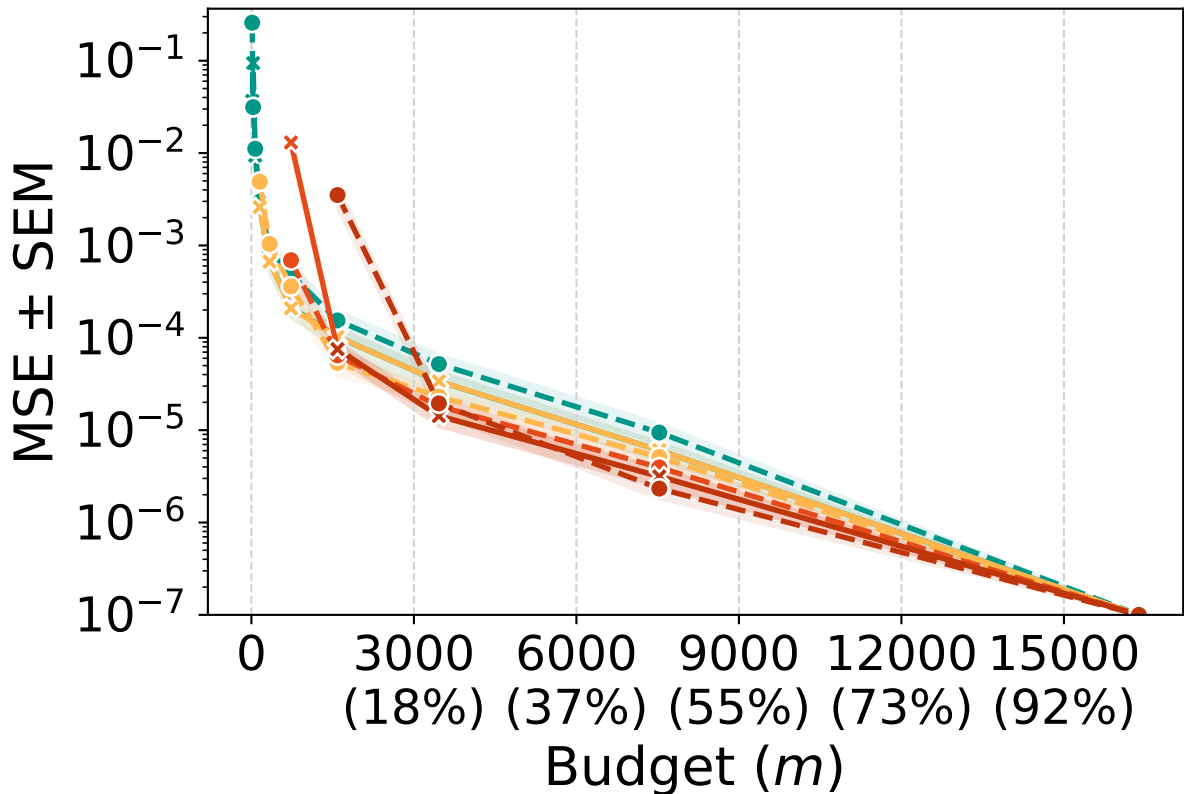

Supplement: supplementary_material [file SentimentIMDBDistilBERT14_1_MSE_paired_vs_standard.pdf › shapiq/experiments/plots/exhaustive/SentimentIMDBDistilBERT14_1_MSE_paired_vs_standard.pdf]

# DistilBERT ( $d = 14$ )

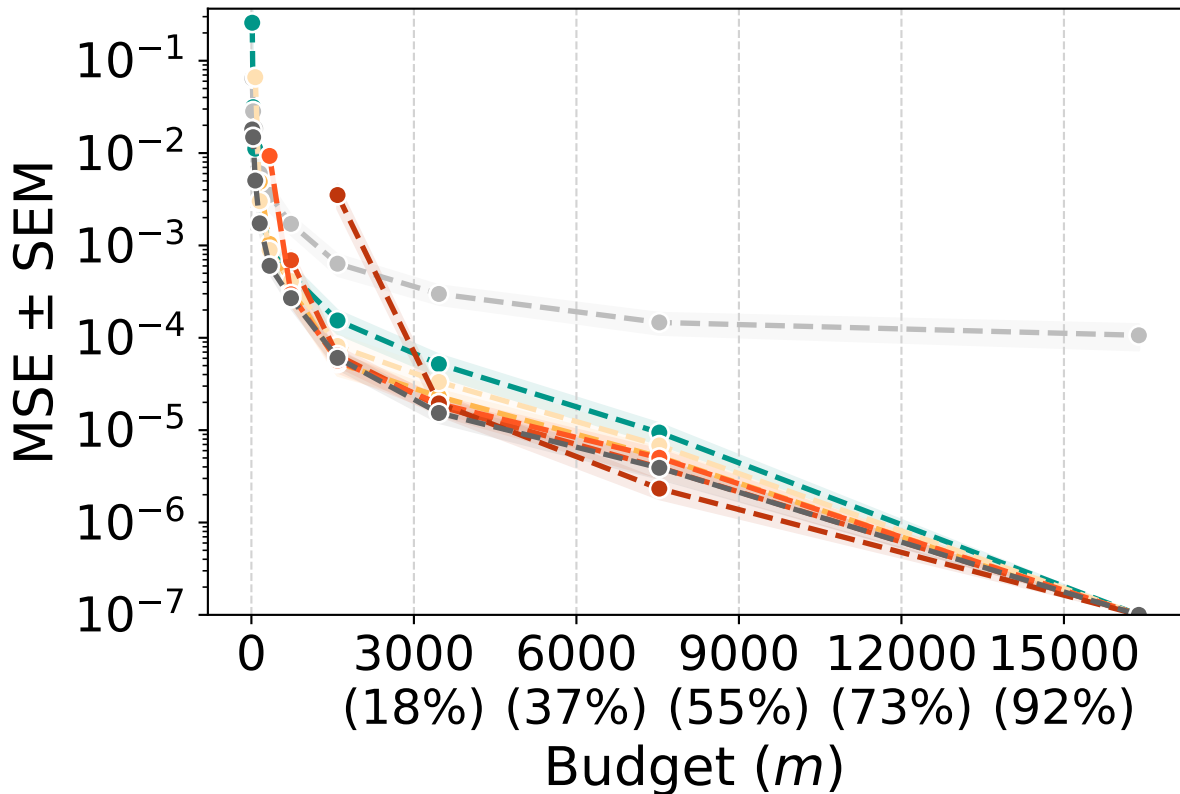

Supplement: supplementary_material [file SentimentIMDBDistilBERT14_1_MSE_standard.pdf › shapiq/experiments/plots/exhaustive/SentimentIMDBDistilBERT14_1_MSE_standard.pdf]

# DistilBERT ( $d = 14$ )

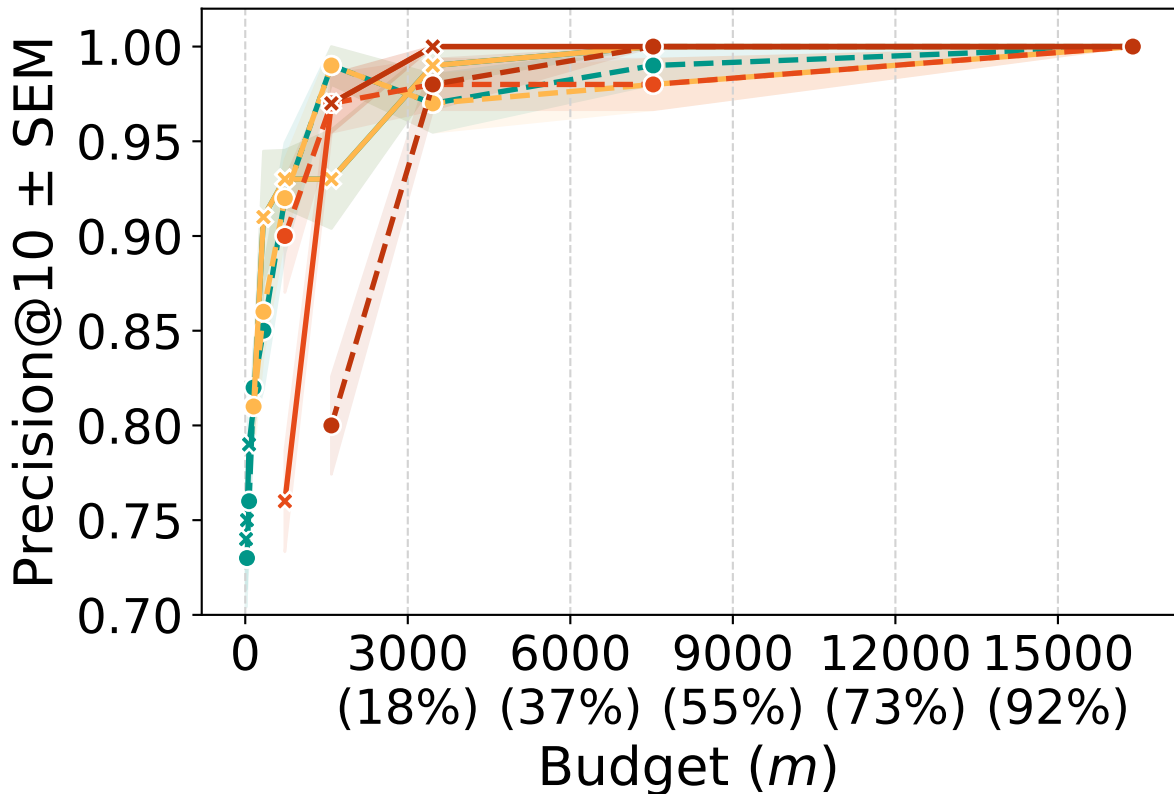

Supplement: supplementary_material [file SentimentIMDBDistilBERT14_1_Precision@10_paired_vs_standard.pdf › shapiq/experiments/plots/exhaustive/SentimentIMDBDistilBERT14_1_Precision@10_paired_vs_standard.pdf]

# DistilBERT ( $d = 14$ )

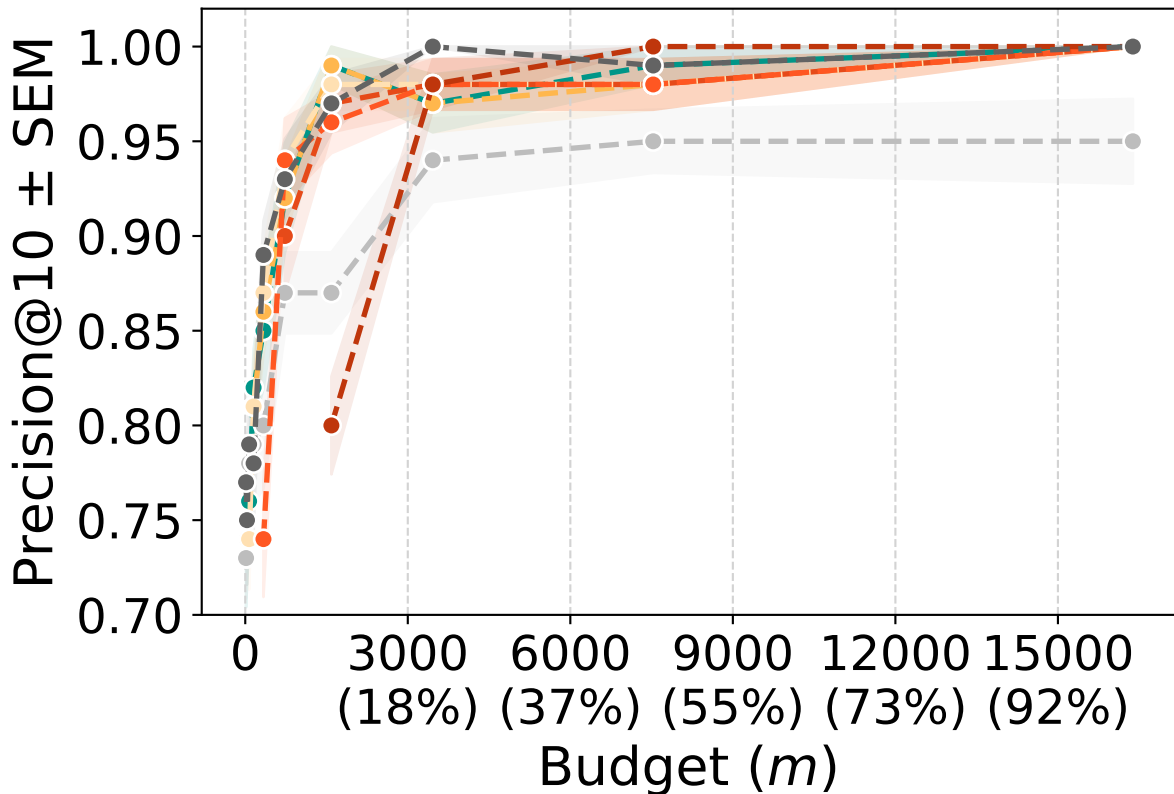

Supplement: supplementary_material [file SentimentIMDBDistilBERT14_1_Precision@10_standard.pdf › shapiq/experiments/plots/exhaustive/SentimentIMDBDistilBERT14_1_Precision@10_standard.pdf]

# DistilBERT ( $d = 14$ )

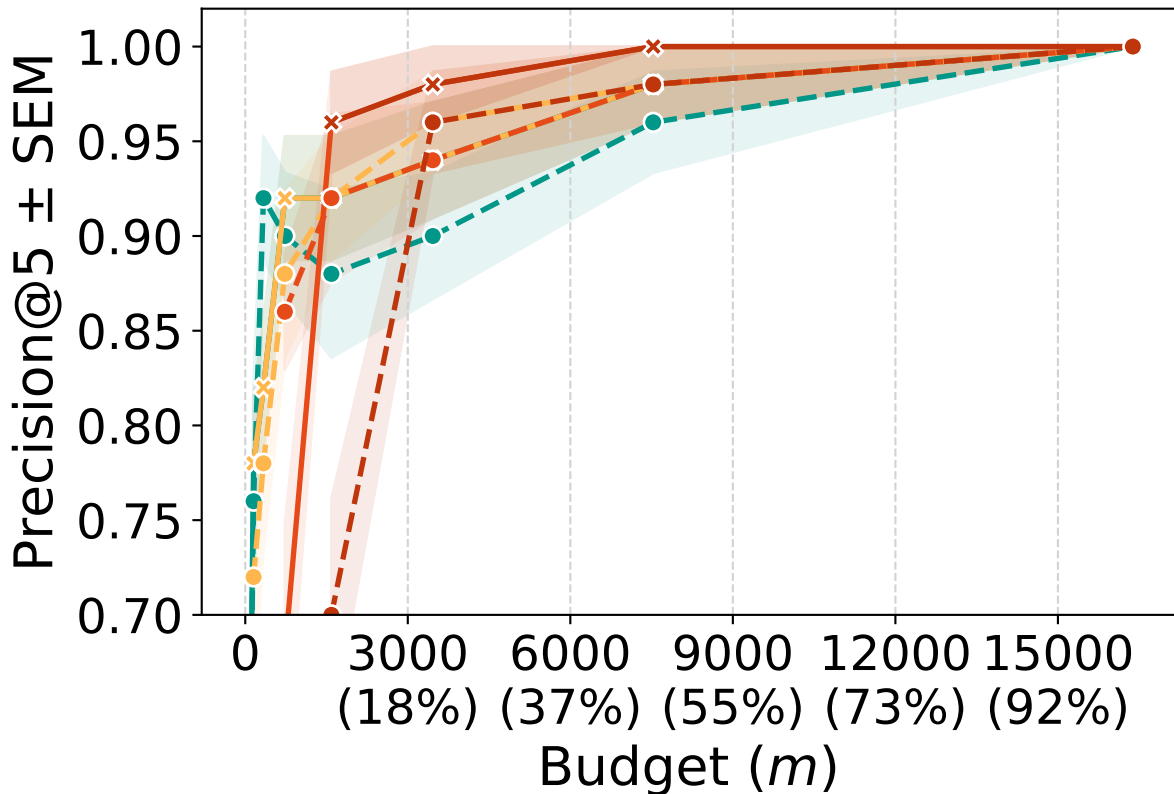

Supplement: supplementary_material [file SentimentIMDBDistilBERT14_1_Precision@5_paired_vs_standard.pdf › shapiq/experiments/plots/exhaustive/SentimentIMDBDistilBERT14_1_Precision@5_paired_vs_standard.pdf]

# DistilBERT ( $d = 14$ )

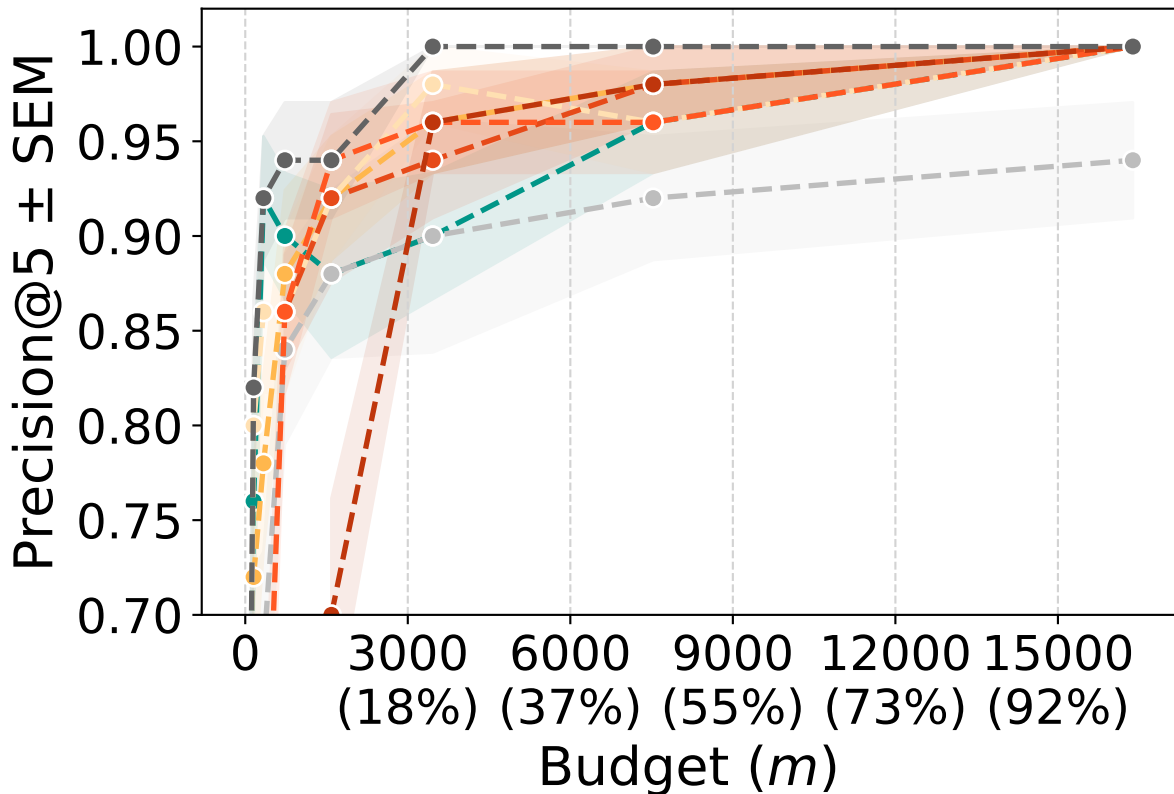

Supplement: supplementary_material [file SentimentIMDBDistilBERT14_1_Precision@5_standard.pdf › shapiq/experiments/plots/exhaustive/SentimentIMDBDistilBERT14_1_Precision@5_standard.pdf]

# DistilBERT ( $d = 14$ )

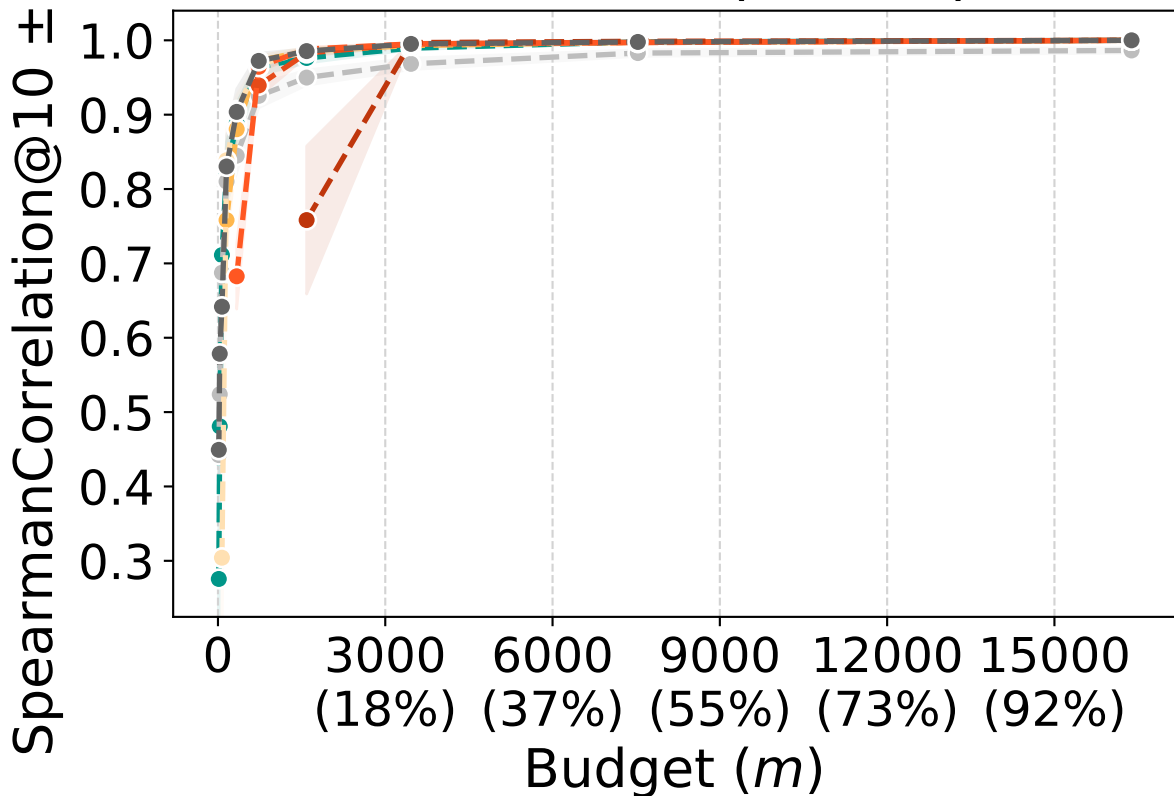

Supplement: supplementary_material [file SentimentIMDBDistilBERT14_1_SpearmanCorrelation@10_standard.pdf › shapiq/experiments/plots/exhaustive/SentimentIMDBDistilBERT14_1_SpearmanCorrelation@10_standard.pdf]

# DistilBERT ( $d = 14$ )

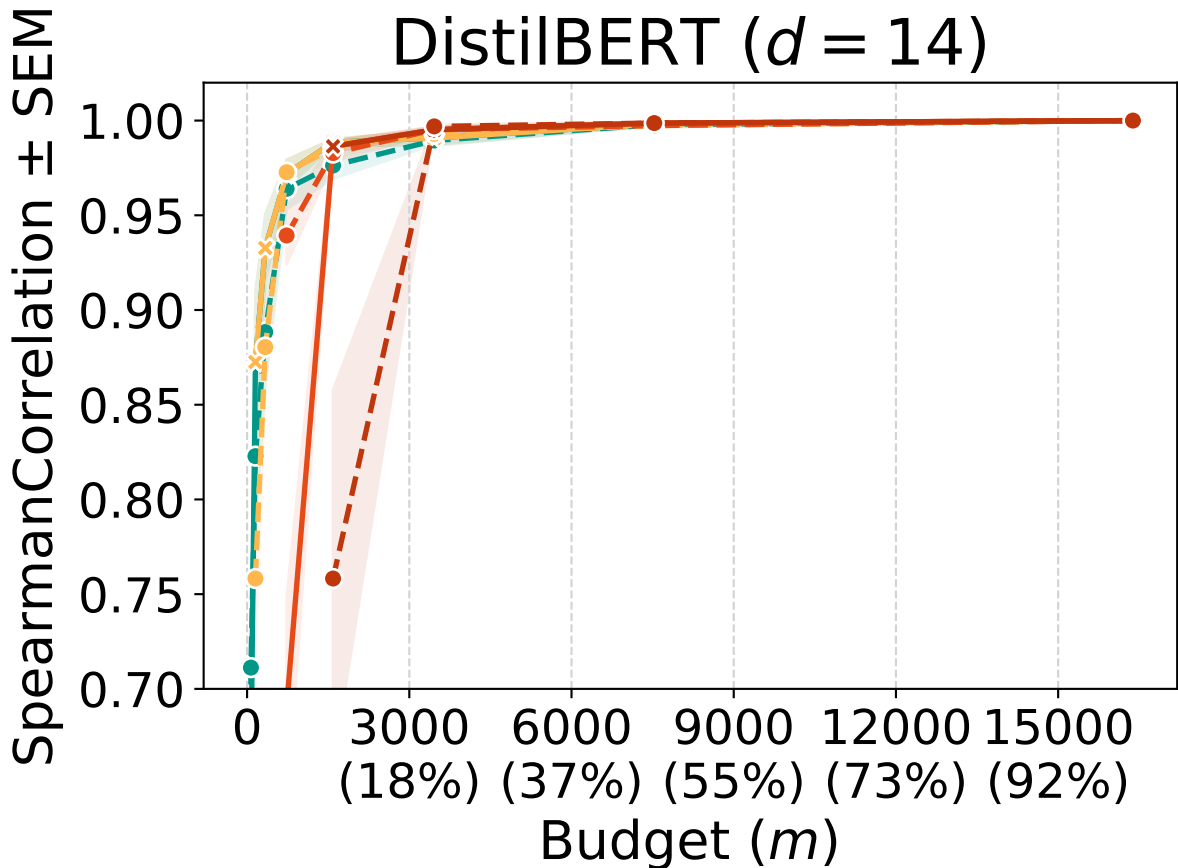

Supplement: supplementary_material [file SentimentIMDBDistilBERT14_1_SpearmanCorrelation_paired_vs_standard.pdf › shapiq/experiments/plots/exhaustive/SentimentIMDBDistilBERT14_1_SpearmanCorrelation_paired_vs_standard.pdf]

# DistilBERT ( $d = 14$ )

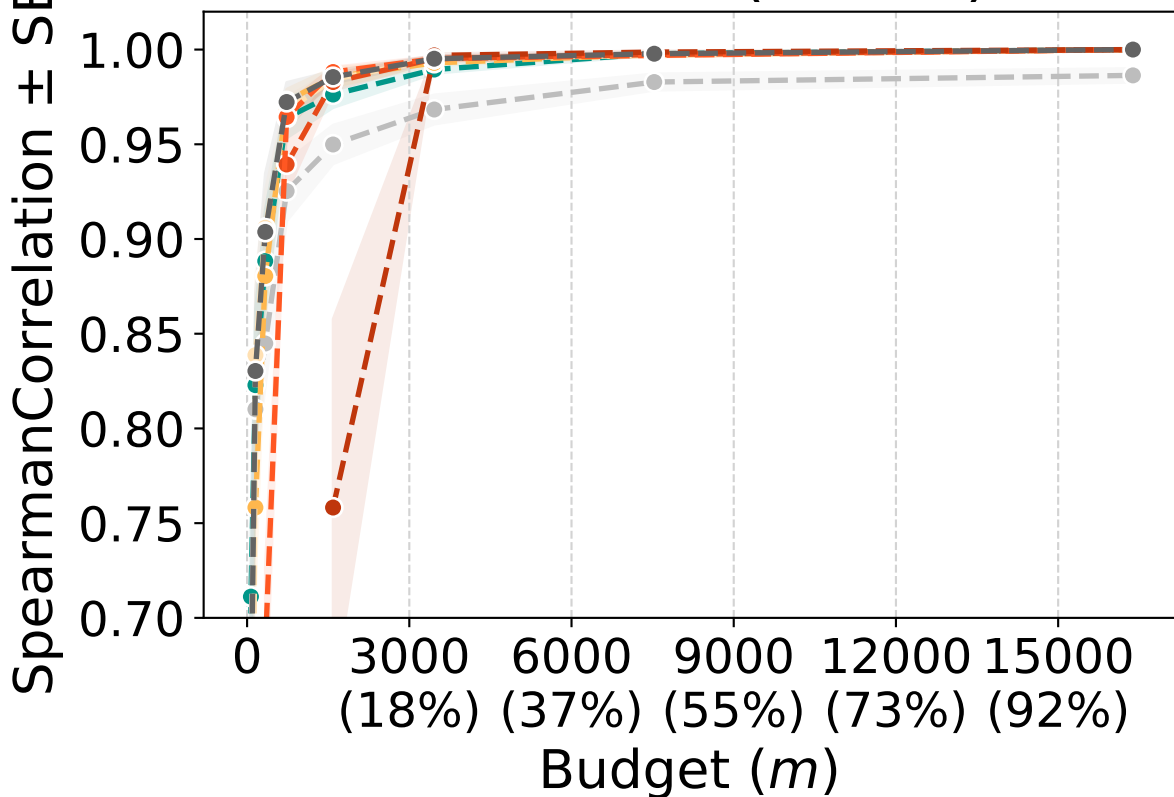

Supplement: supplementary_material [file SentimentIMDBDistilBERT14_1_SpearmanCorrelation_standard.pdf › shapiq/experiments/plots/exhaustive/SentimentIMDBDistilBERT14_1_SpearmanCorrelation_standard.pdf]

# ViT9 ( $d = 9$ )

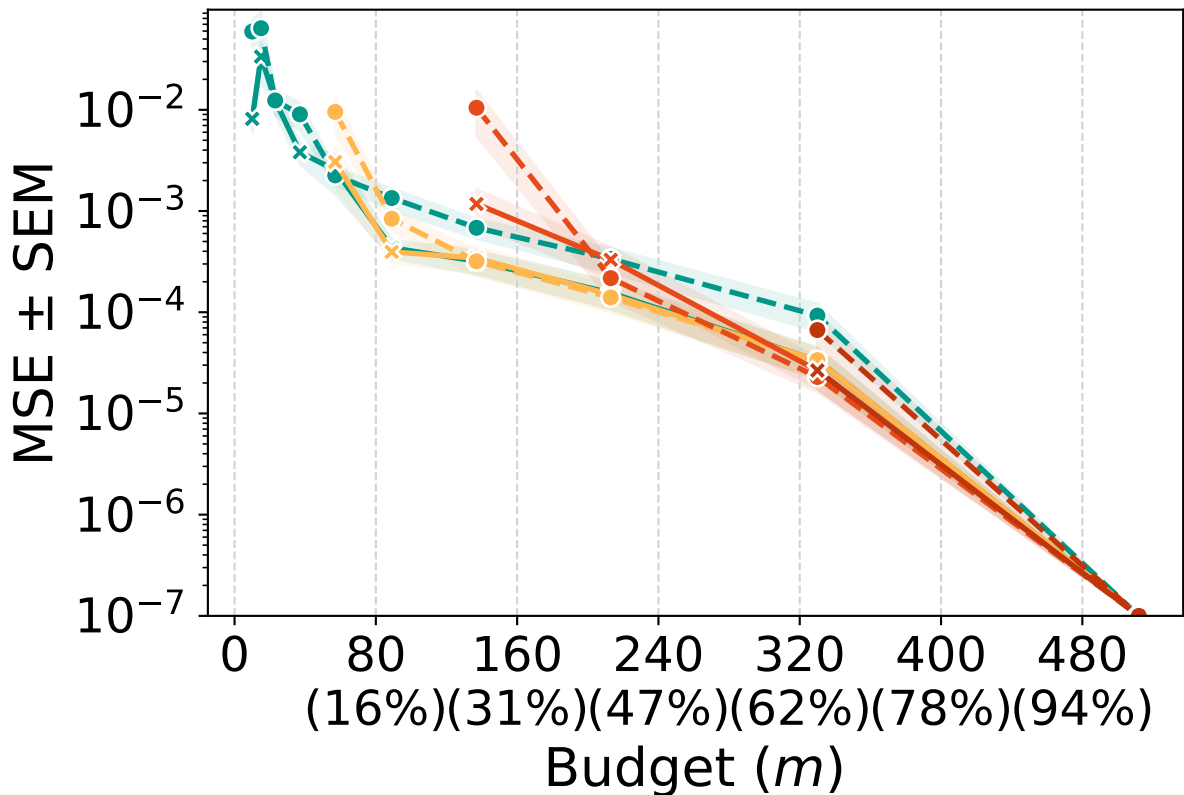

Supplement: supplementary_material [file ViT3by3Patches_1_MSE_paired_vs_standard.pdf › shapiq/experiments/plots/exhaustive/ViT3by3Patches_1_MSE_paired_vs_standard.pdf]

# ViT9 ( $d = 9$ )

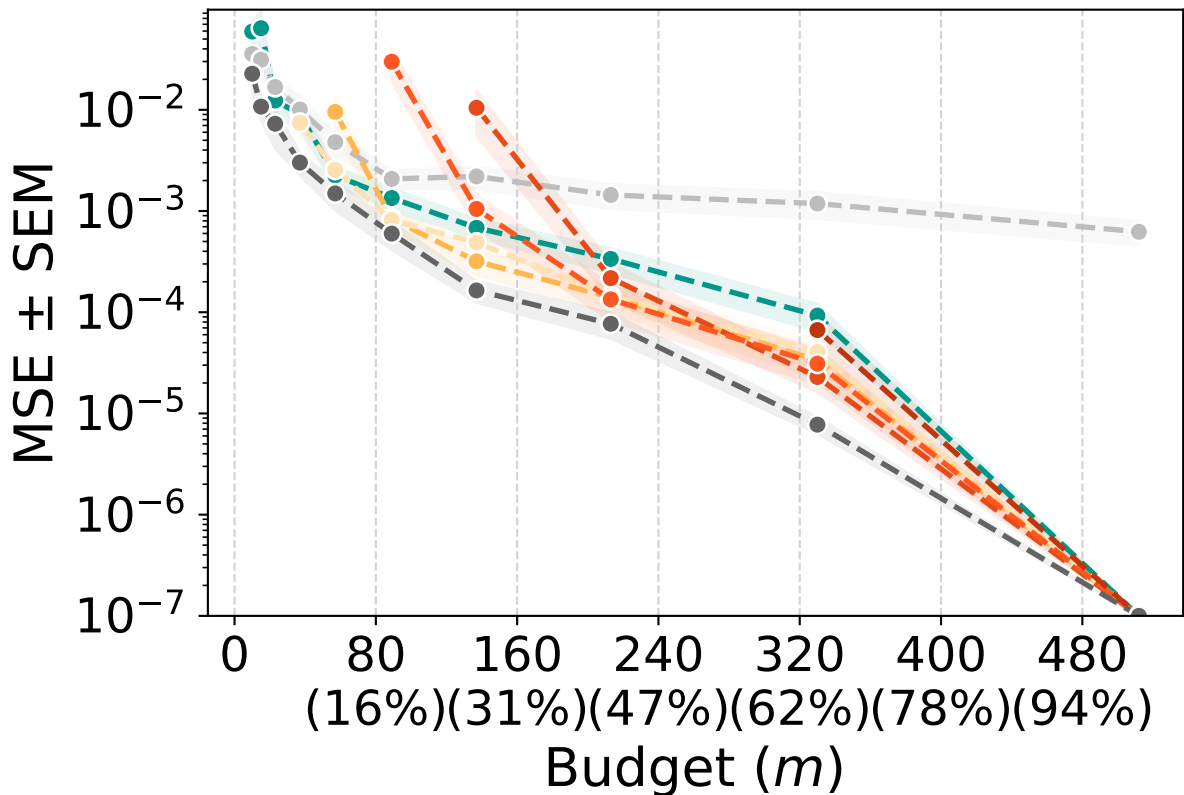

Supplement: supplementary_material [file ViT3by3Patches_1_MSE_standard.pdf › shapiq/experiments/plots/exhaustive/ViT3by3Patches_1_MSE_standard.pdf]

# ViT9 ( $d = 9$ )

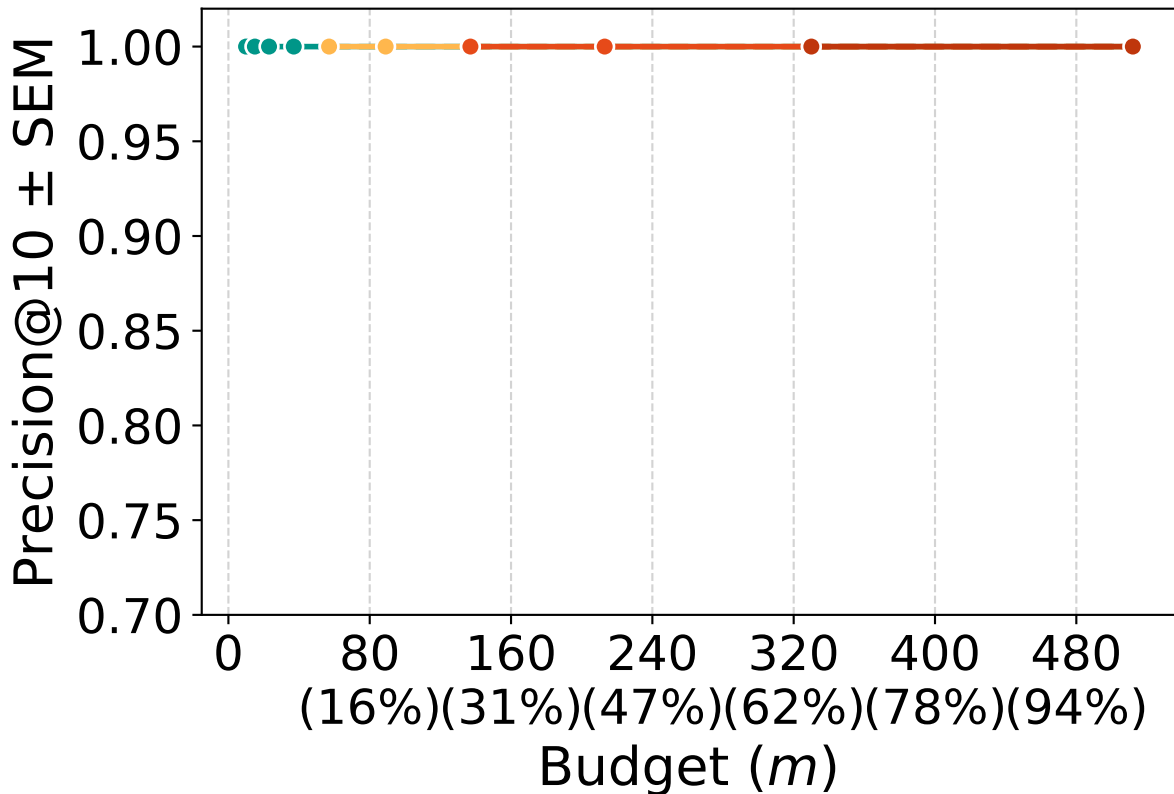

Supplement: supplementary_material [file ViT3by3Patches_1_Precision@10_paired_vs_standard.pdf › shapiq/experiments/plots/exhaustive/ViT3by3Patches_1_Precision@10_paired_vs_standard.pdf]

# ViT9 ( $d = 9$ )

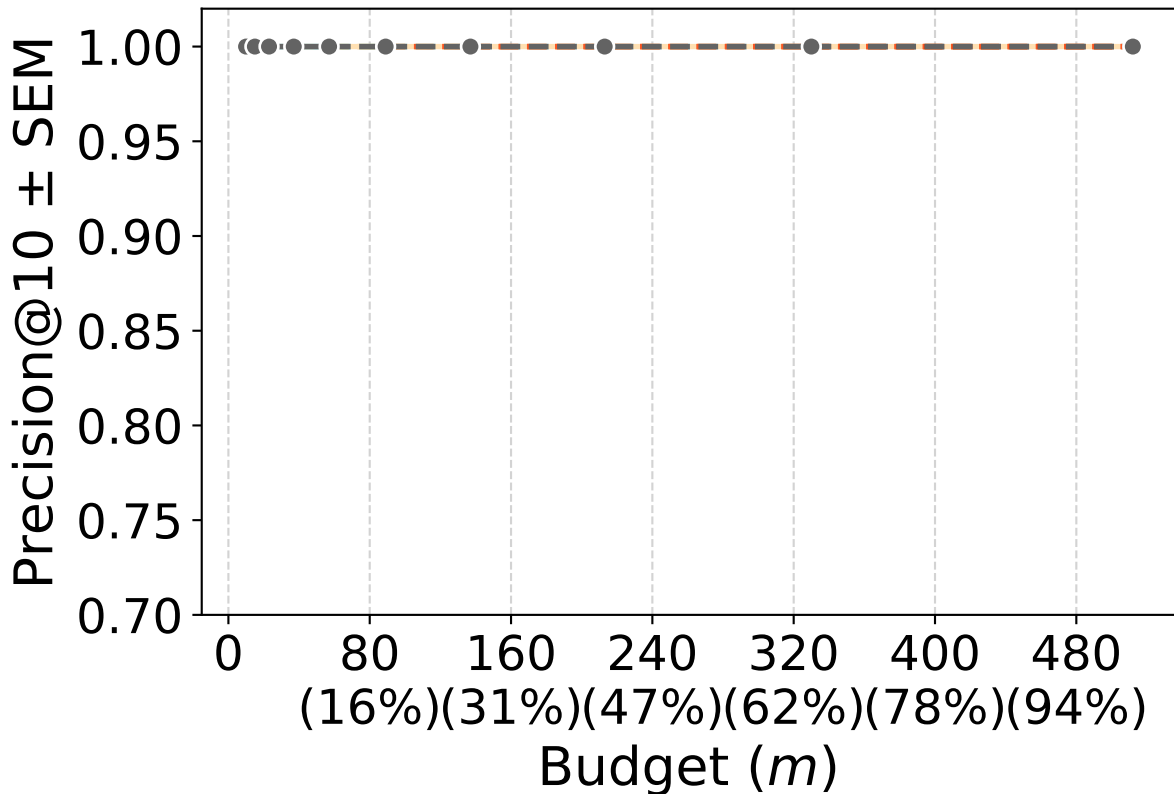

Supplement: supplementary_material [file ViT3by3Patches_1_Precision@10_standard.pdf › shapiq/experiments/plots/exhaustive/ViT3by3Patches_1_Precision@10_standard.pdf]

# ViT9 ( $d = 9$ )

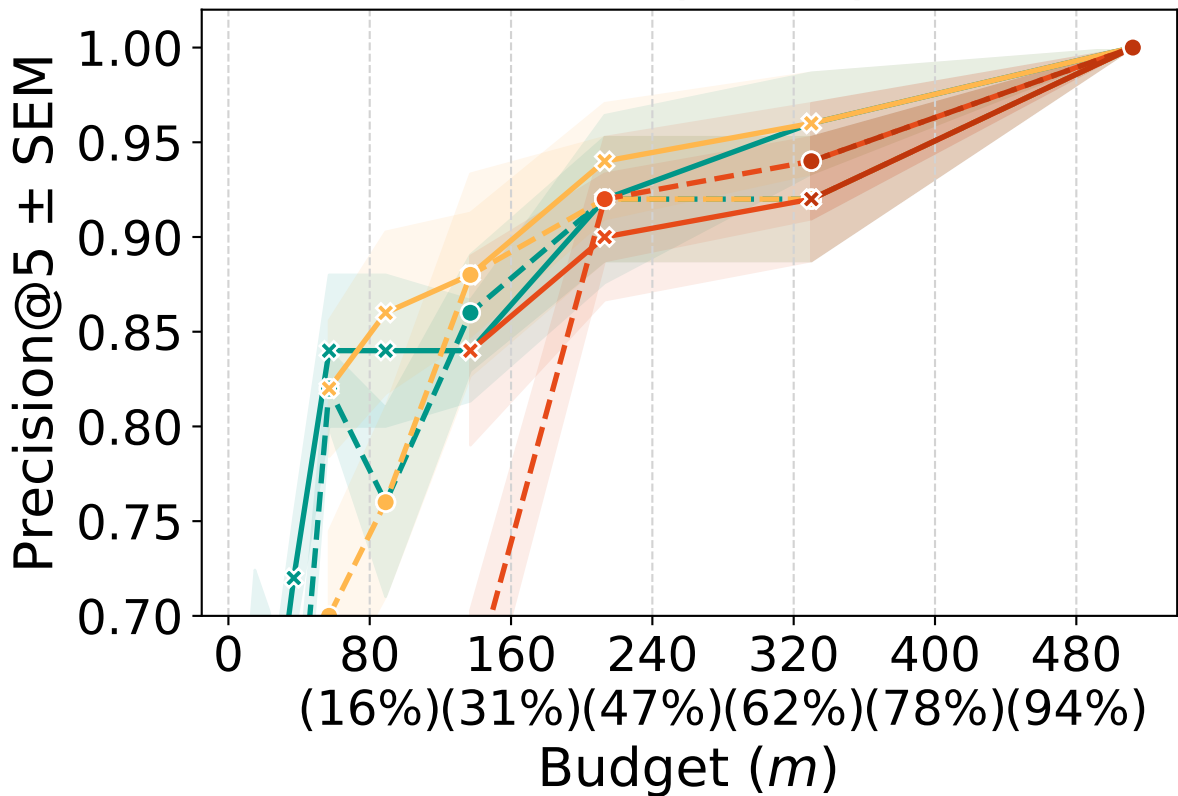

Supplement: supplementary_material [file ViT3by3Patches_1_Precision@5_paired_vs_standard.pdf › shapiq/experiments/plots/exhaustive/ViT3by3Patches_1_Precision@5_paired_vs_standard.pdf]

# ViT9 ( $d = 9$ )

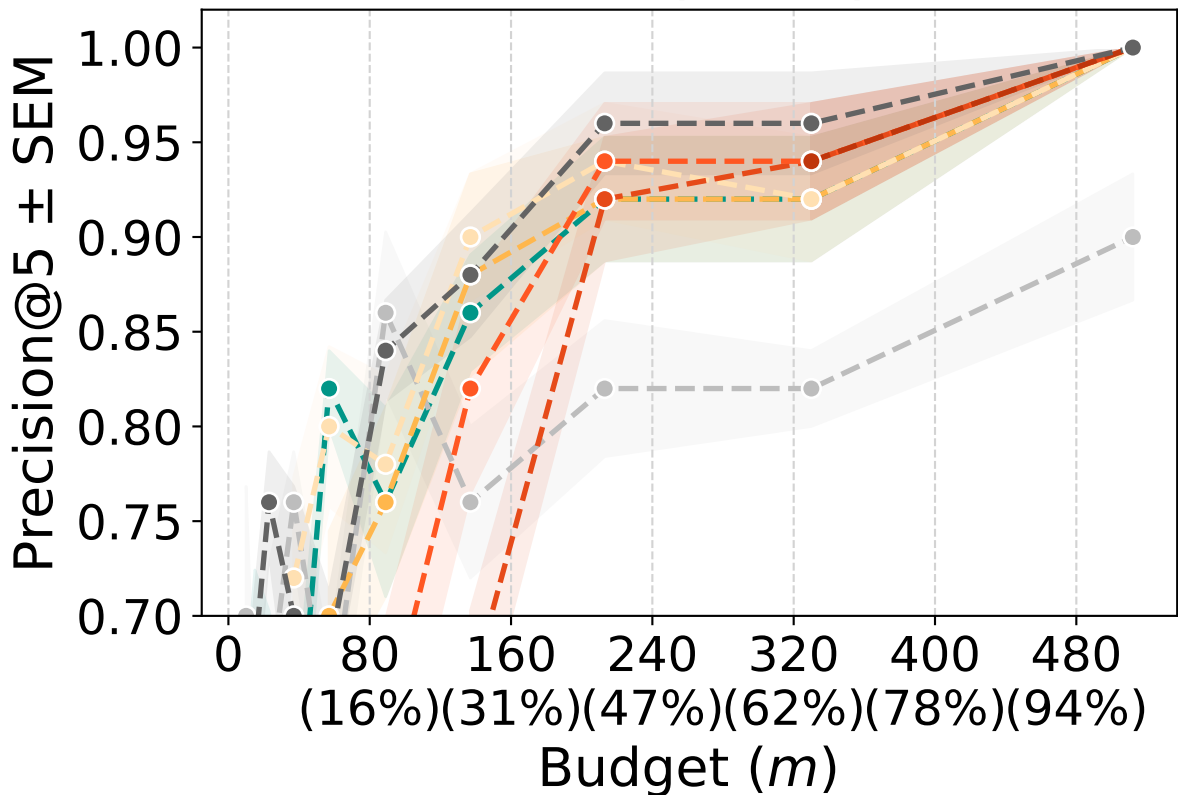

Supplement: supplementary_material [file ViT3by3Patches_1_Precision@5_standard.pdf › shapiq/experiments/plots/exhaustive/ViT3by3Patches_1_Precision@5_standard.pdf]

# ViT9 ( $d = 9$ )

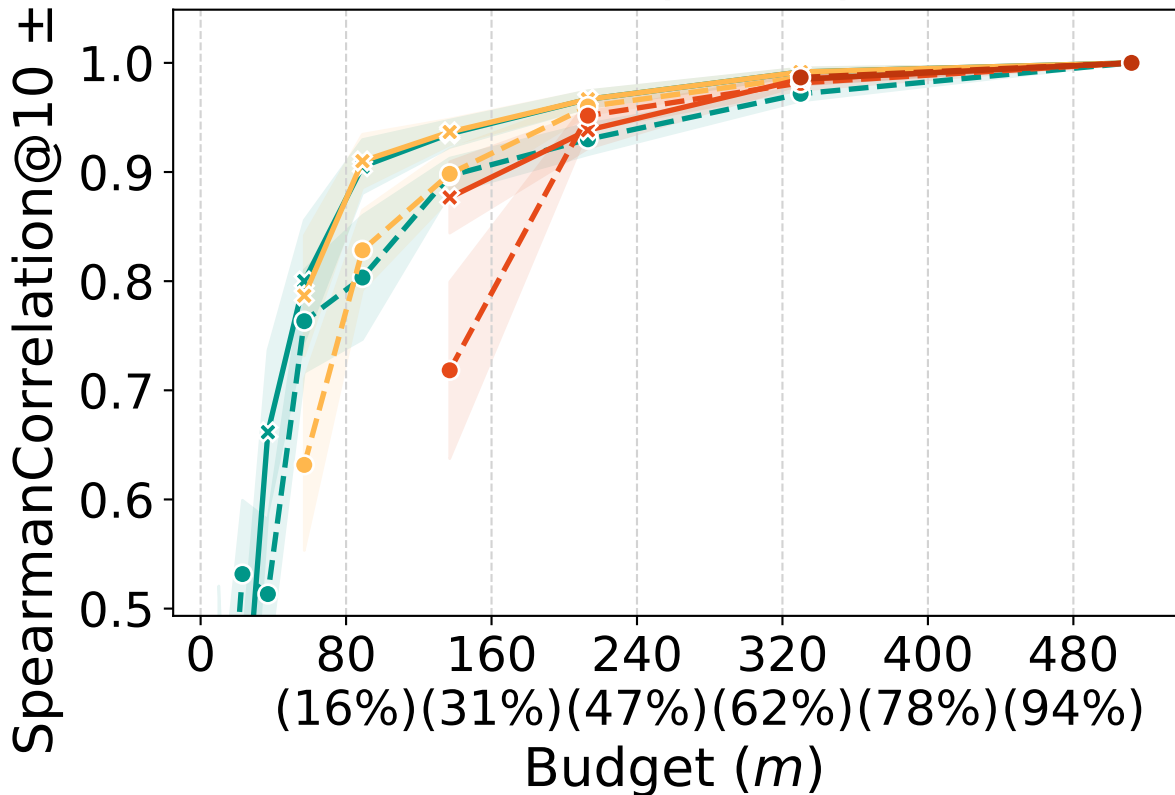

Supplement: supplementary_material [file ViT3by3Patches_1_SpearmanCorrelation@10_paired_vs_standard.pdf › shapiq/experiments/plots/exhaustive/ViT3by3Patches_1_SpearmanCorrelation@10_paired_vs_standard.pdf]

# ViT9 ( $d = 9$ )

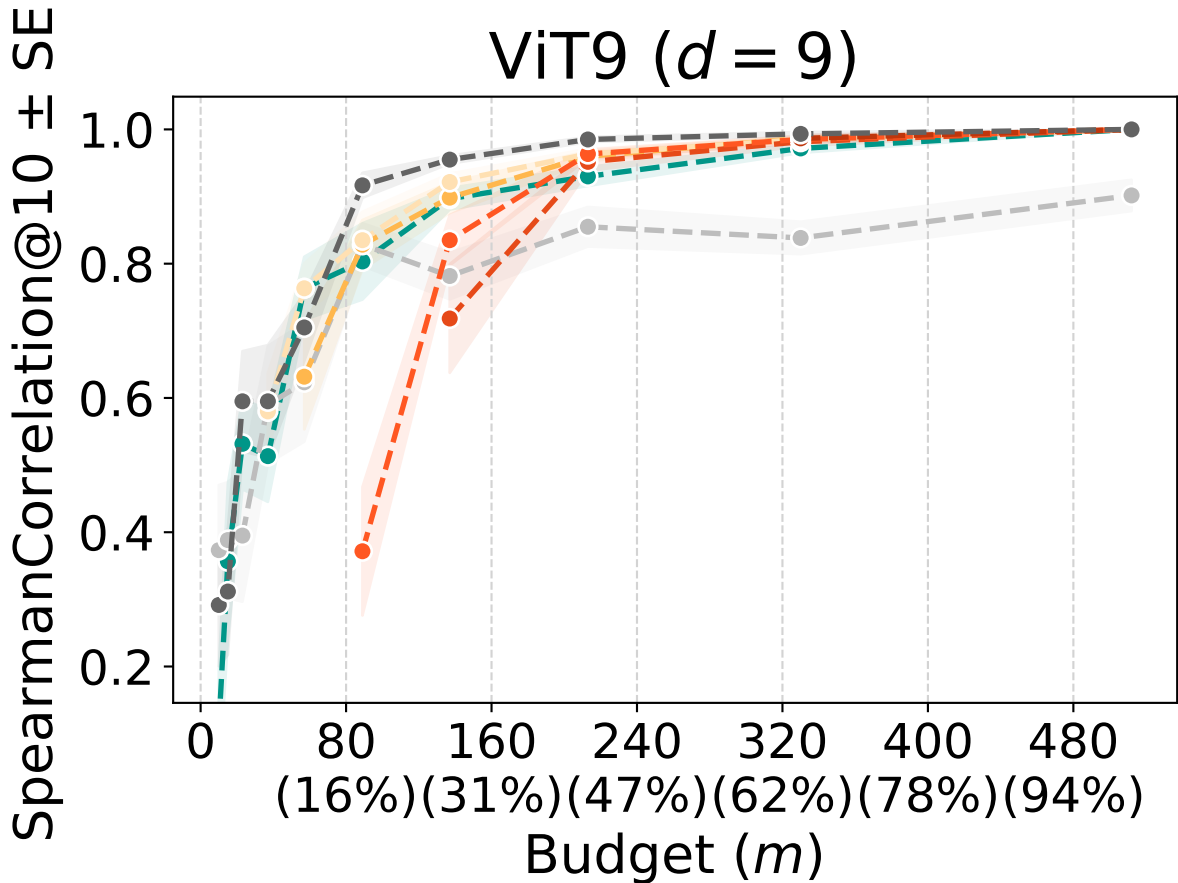

Supplement: supplementary_material [file ViT3by3Patches_1_SpearmanCorrelation@10_standard.pdf › shapiq/experiments/plots/exhaustive/ViT3by3Patches_1_SpearmanCorrelation@10_standard.pdf]

# ViT9 ( $d = 9$ )

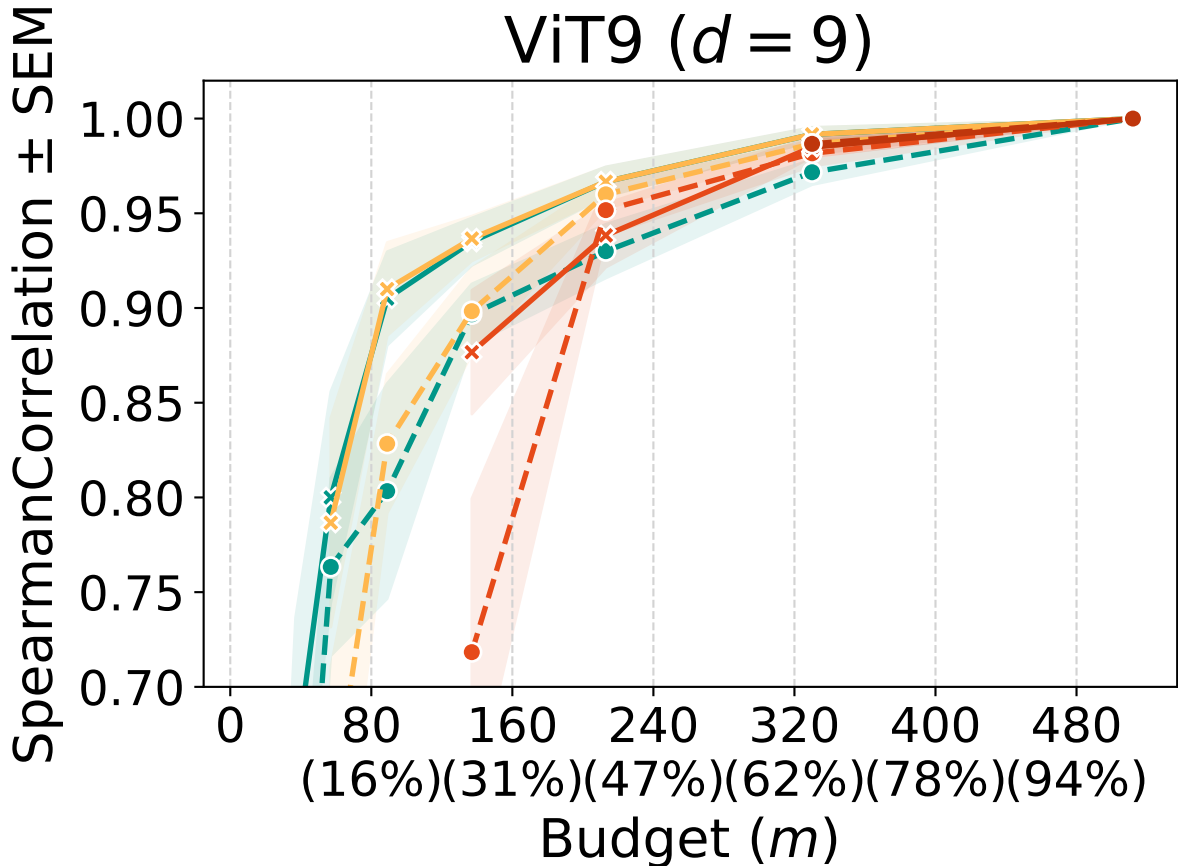

Supplement: supplementary_material [file ViT3by3Patches_1_SpearmanCorrelation_paired_vs_standard.pdf › shapiq/experiments/plots/exhaustive/ViT3by3Patches_1_SpearmanCorrelation_paired_vs_standard.pdf]

# ViT9 ( $d = 9$ )

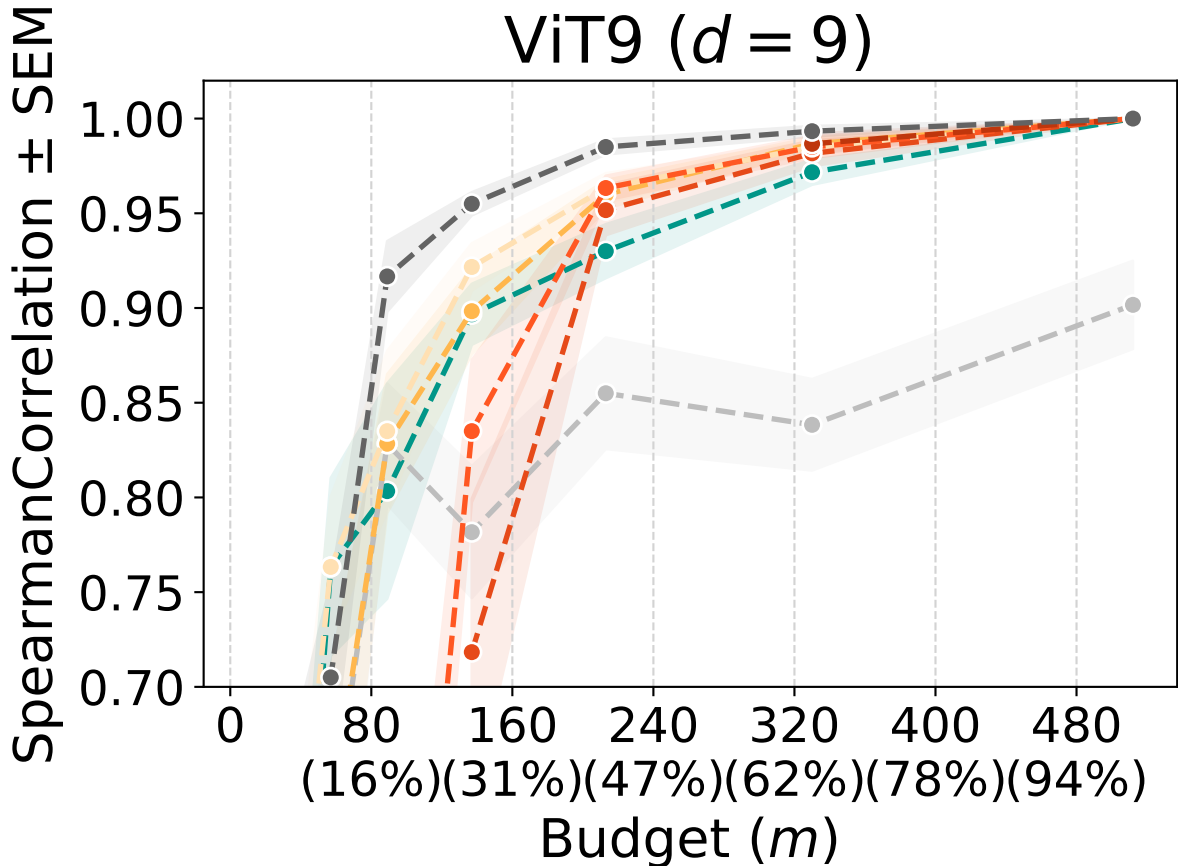

Supplement: supplementary_material [file ViT3by3Patches_1_SpearmanCorrelation_standard.pdf › shapiq/experiments/plots/exhaustive/ViT3by3Patches_1_SpearmanCorrelation_standard.pdf]

# ViT16 ( $d = 16$ )

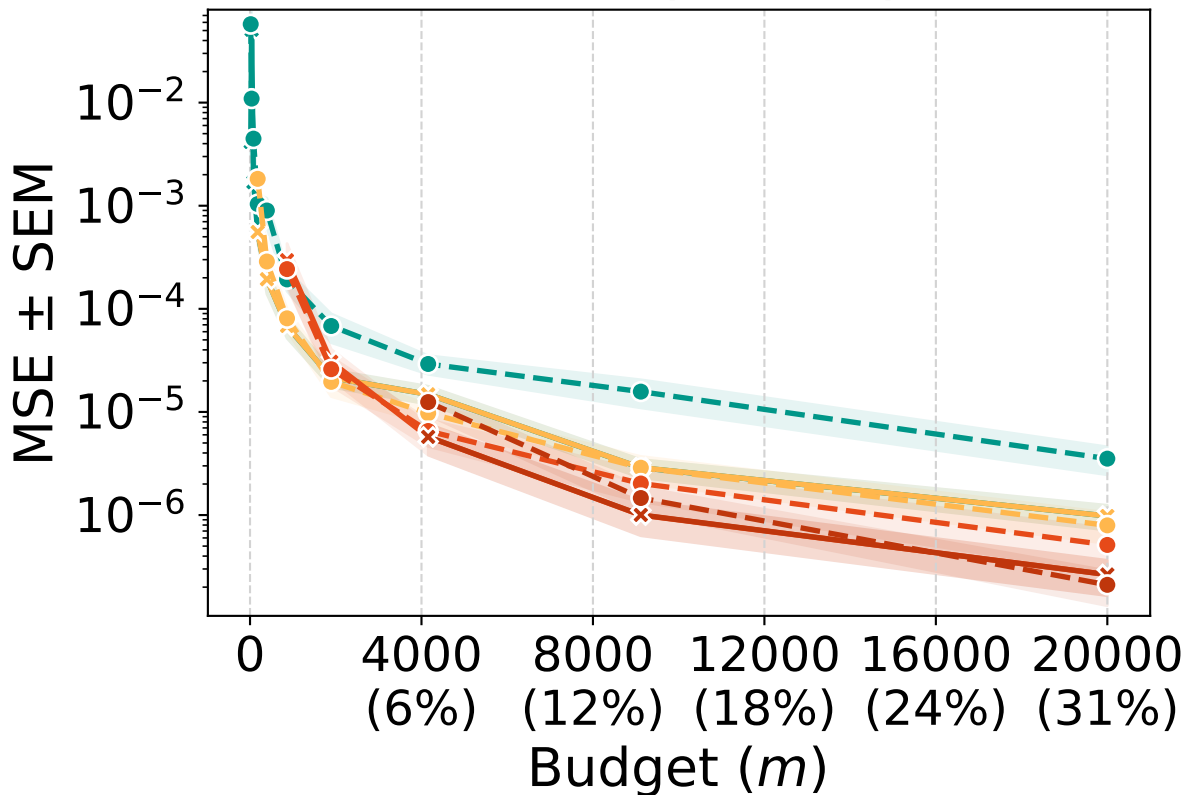

Supplement: supplementary_material [file ViT4by4Patches_1_MSE_paired_vs_standard.pdf › shapiq/experiments/plots/exhaustive/ViT4by4Patches_1_MSE_paired_vs_standard.pdf]

# ViT16 ( $d = 16$ )

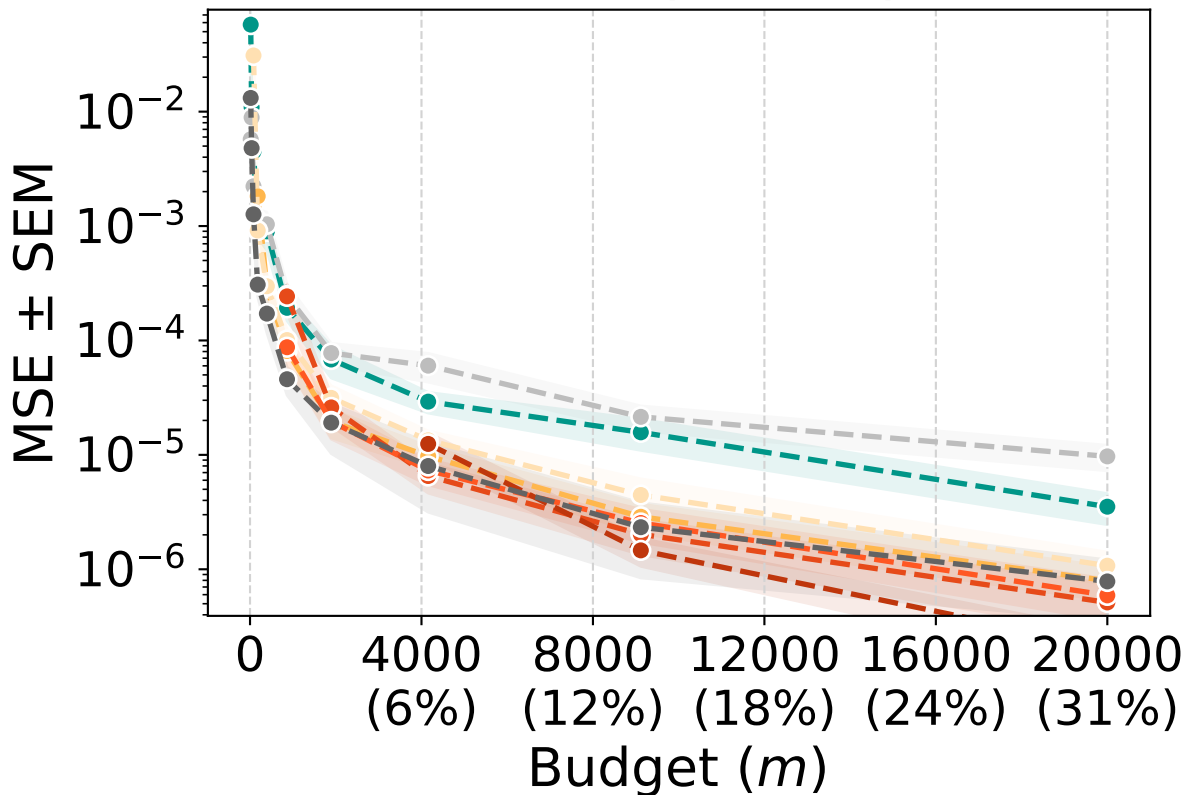

Supplement: supplementary_material [file ViT4by4Patches_1_MSE_standard.pdf › shapiq/experiments/plots/exhaustive/ViT4by4Patches_1_MSE_standard.pdf]

# ViT16 ( $d = 16$ )

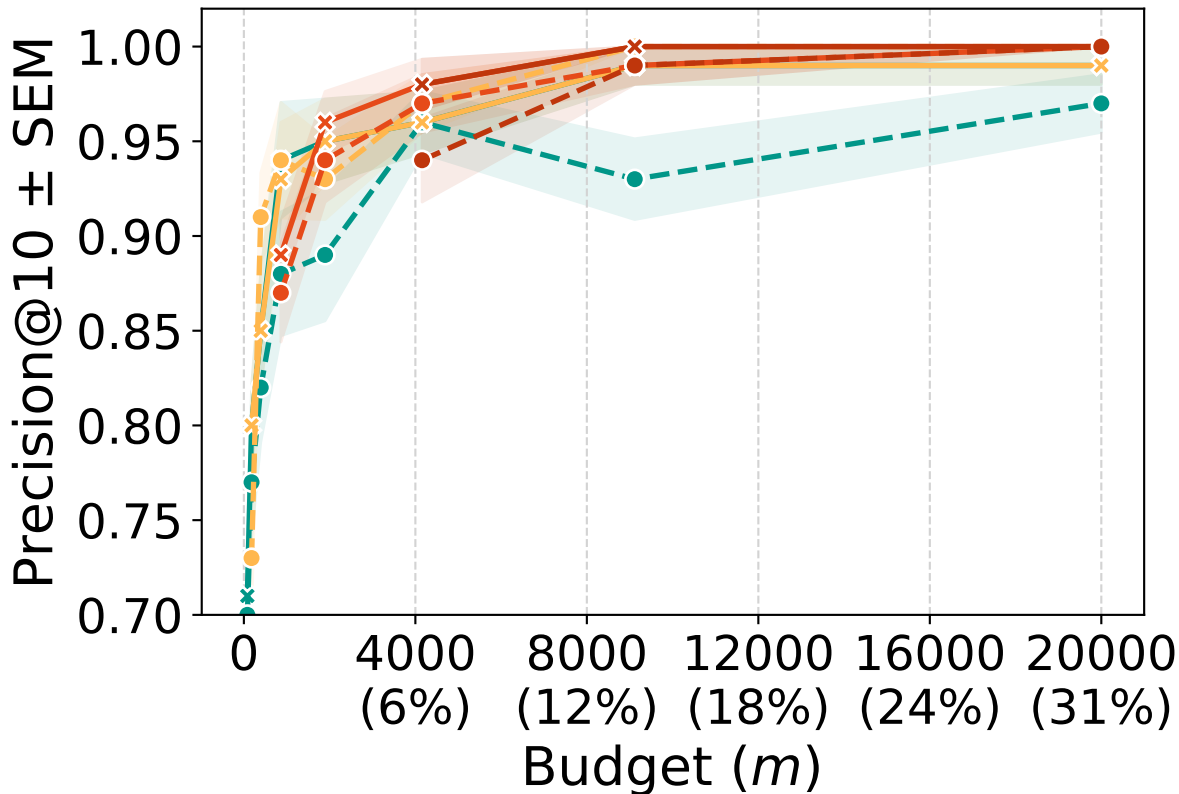

Supplement: supplementary_material [file ViT4by4Patches_1_Precision@10_paired_vs_standard.pdf › shapiq/experiments/plots/exhaustive/ViT4by4Patches_1_Precision@10_paired_vs_standard.pdf]

# ViT16 ( $d = 16$ )

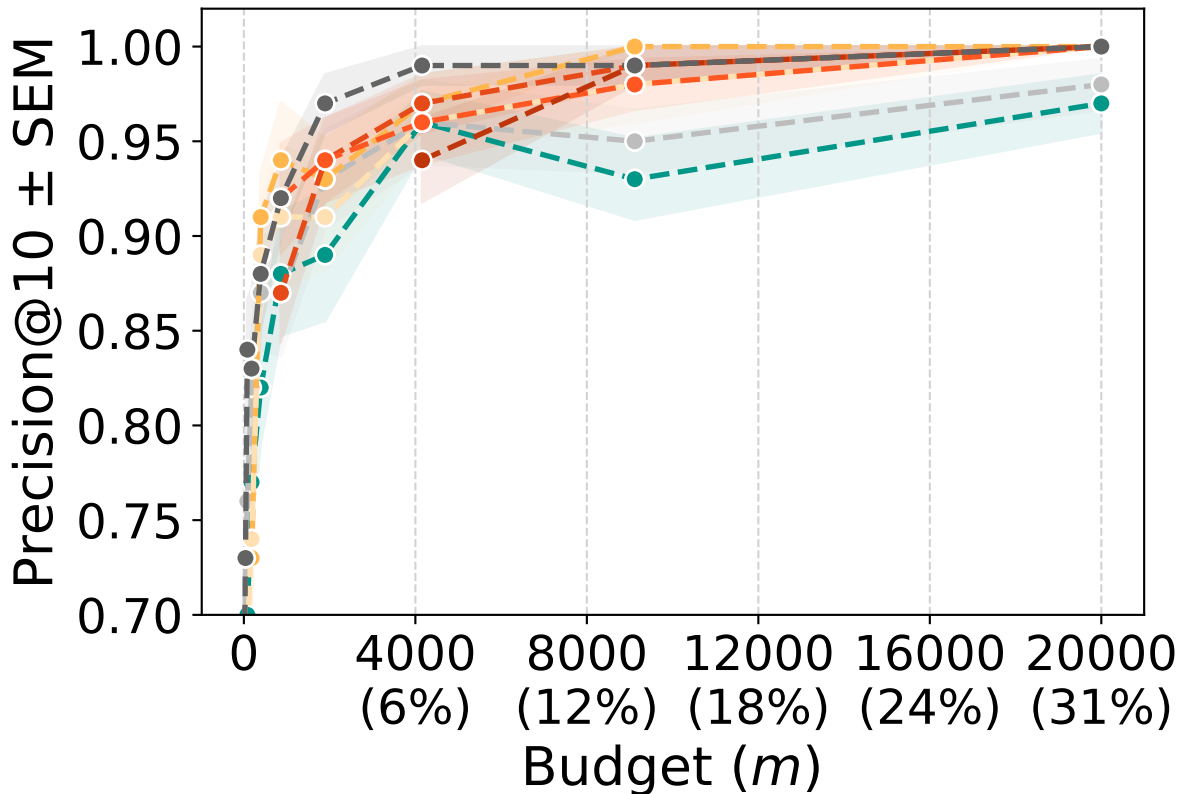

Supplement: supplementary_material [file ViT4by4Patches_1_Precision@10_standard.pdf › shapiq/experiments/plots/exhaustive/ViT4by4Patches_1_Precision@10_standard.pdf]

# ViT16 ( $d = 16$ )

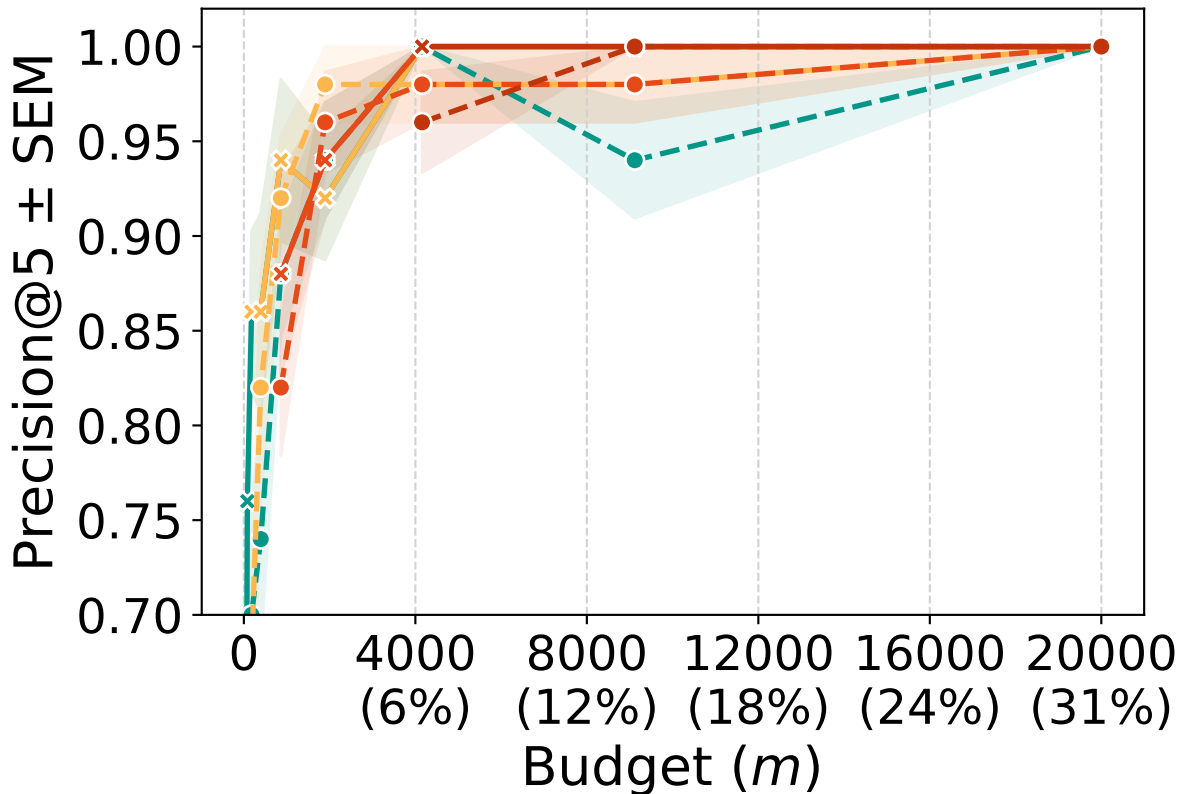

Supplement: supplementary_material [file ViT4by4Patches_1_Precision@5_paired_vs_standard.pdf › shapiq/experiments/plots/exhaustive/ViT4by4Patches_1_Precision@5_paired_vs_standard.pdf]

# ViT16 ( $d = 16$ )

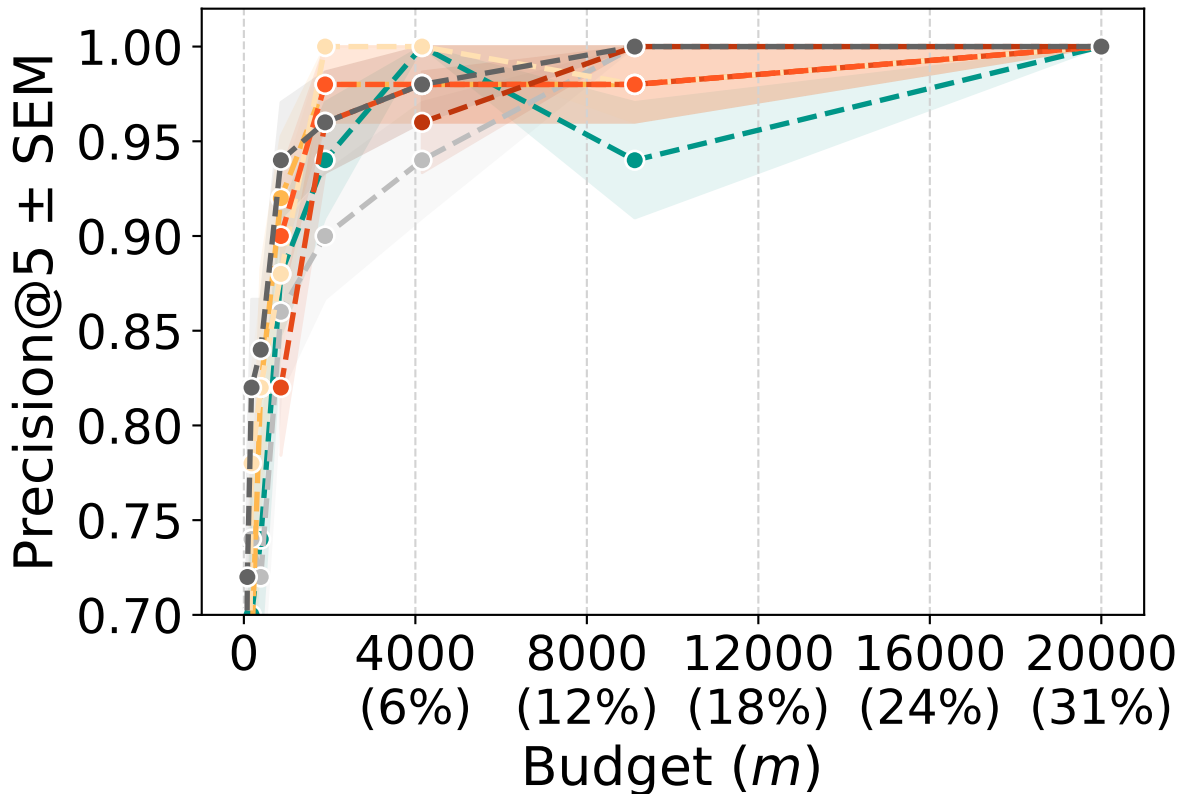

Supplement: supplementary_material [file ViT4by4Patches_1_Precision@5_standard.pdf › shapiq/experiments/plots/exhaustive/ViT4by4Patches_1_Precision@5_standard.pdf]

# ViT16 ( $d = 16$ )

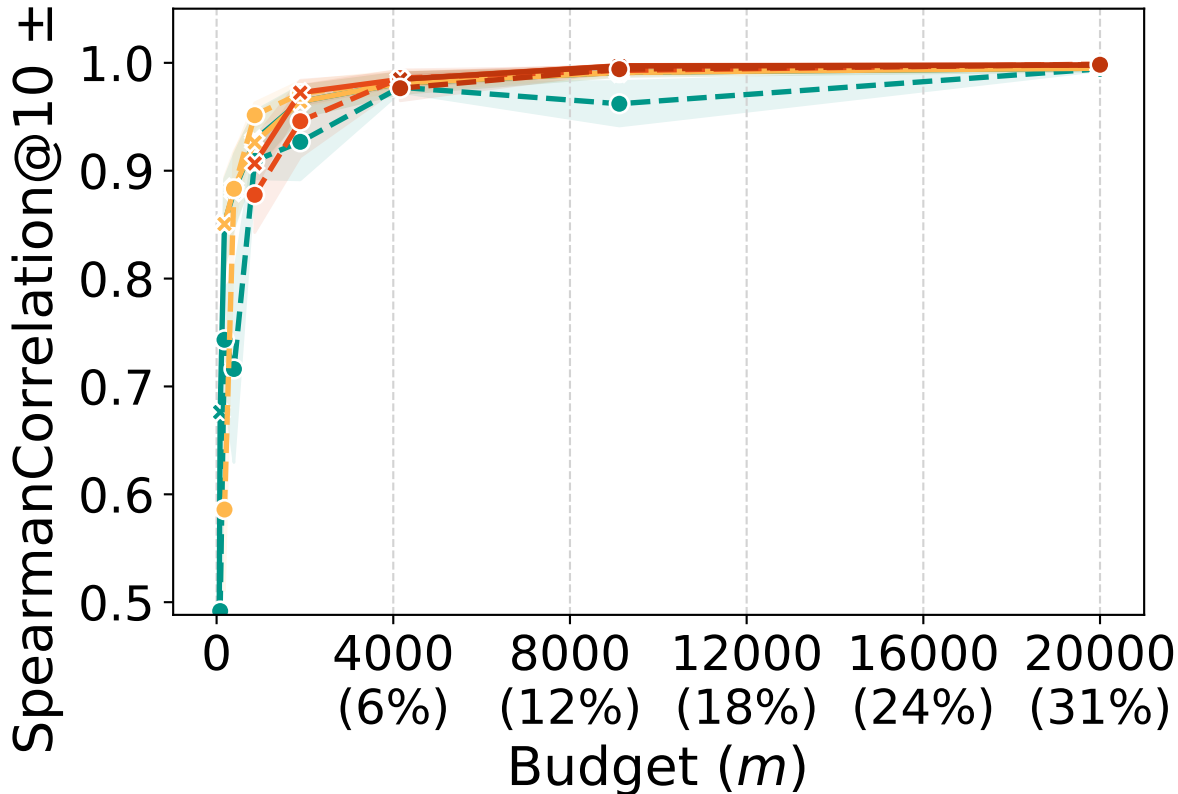

Supplement: supplementary_material [file ViT4by4Patches_1_SpearmanCorrelation@10_paired_vs_standard.pdf › shapiq/experiments/plots/exhaustive/ViT4by4Patches_1_SpearmanCorrelation@10_paired_vs_standard.pdf]

# ViT16 ( $d = 16$ )

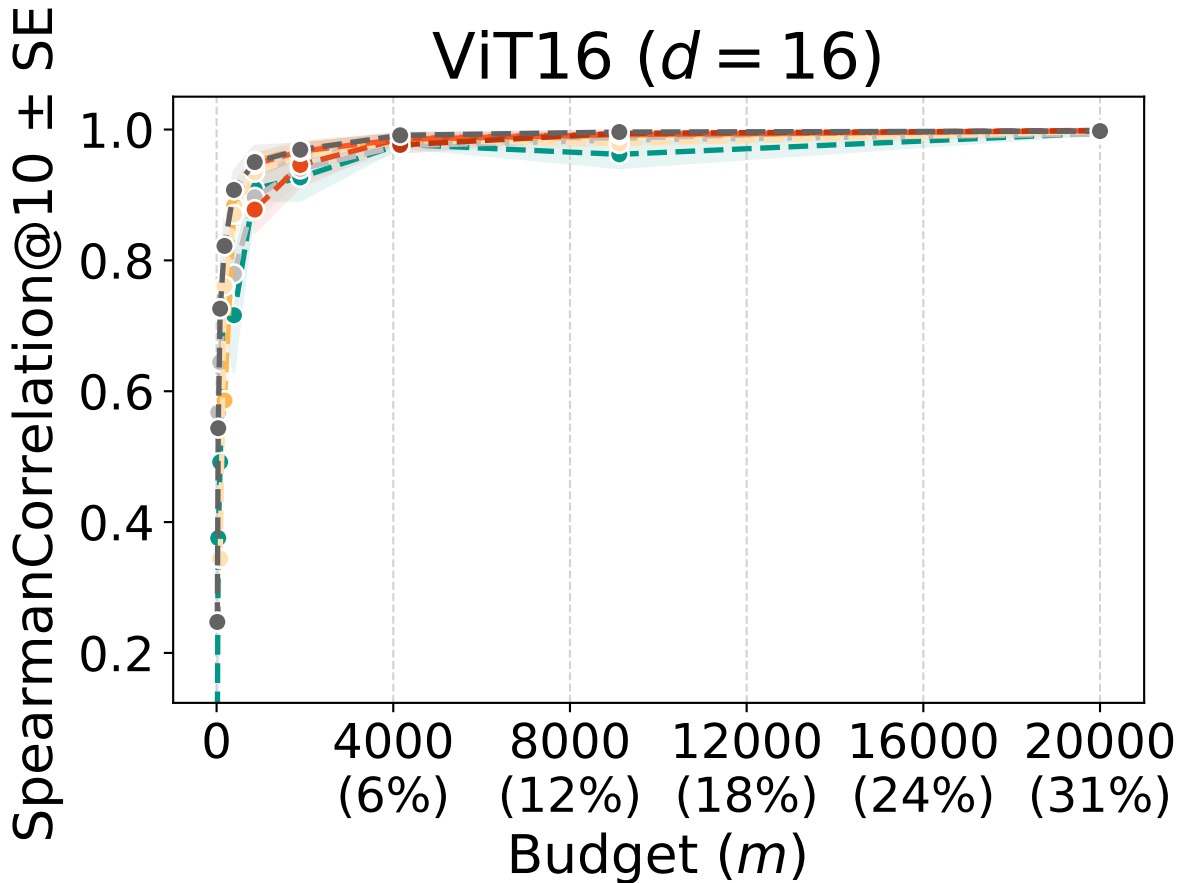

Supplement: supplementary_material [file ViT4by4Patches_1_SpearmanCorrelation@10_standard.pdf › shapiq/experiments/plots/exhaustive/ViT4by4Patches_1_SpearmanCorrelation@10_standard.pdf]

# ViT16 ( $d = 16$ )

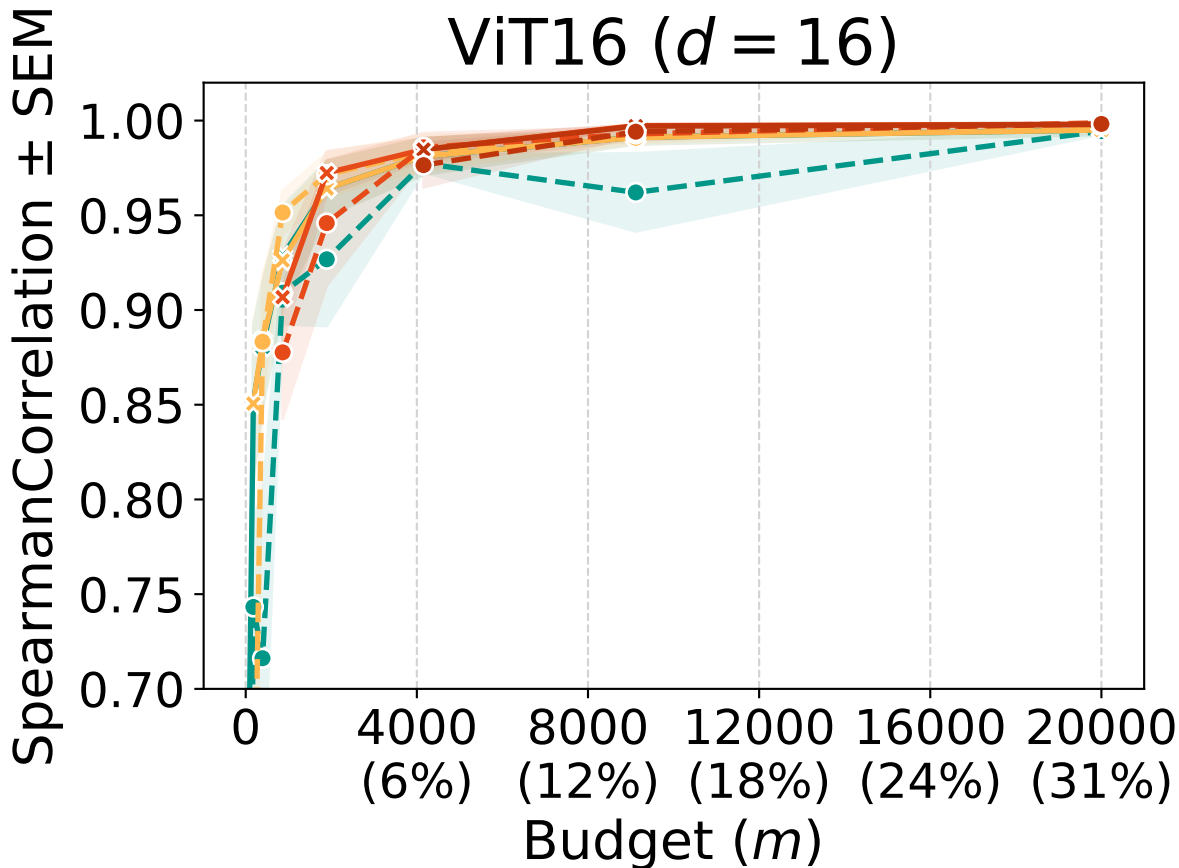

Supplement: supplementary_material [file ViT4by4Patches_1_SpearmanCorrelation_paired_vs_standard.pdf › shapiq/experiments/plots/exhaustive/ViT4by4Patches_1_SpearmanCorrelation_paired_vs_standard.pdf]

# ViT16 ( $d = 16$ )

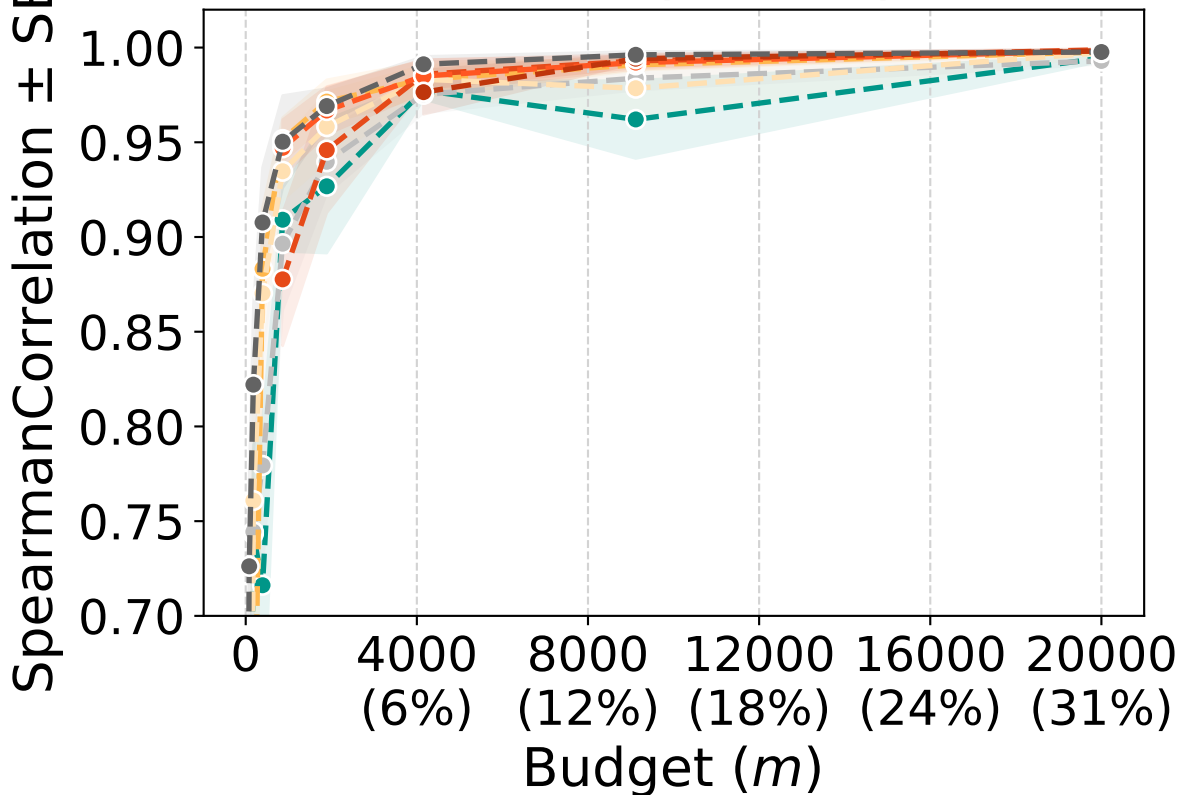

Supplement: supplementary_material [file ViT4by4Patches_1_SpearmanCorrelation_standard.pdf › shapiq/experiments/plots/exhaustive/ViT4by4Patches_1_SpearmanCorrelation_standard.pdf]

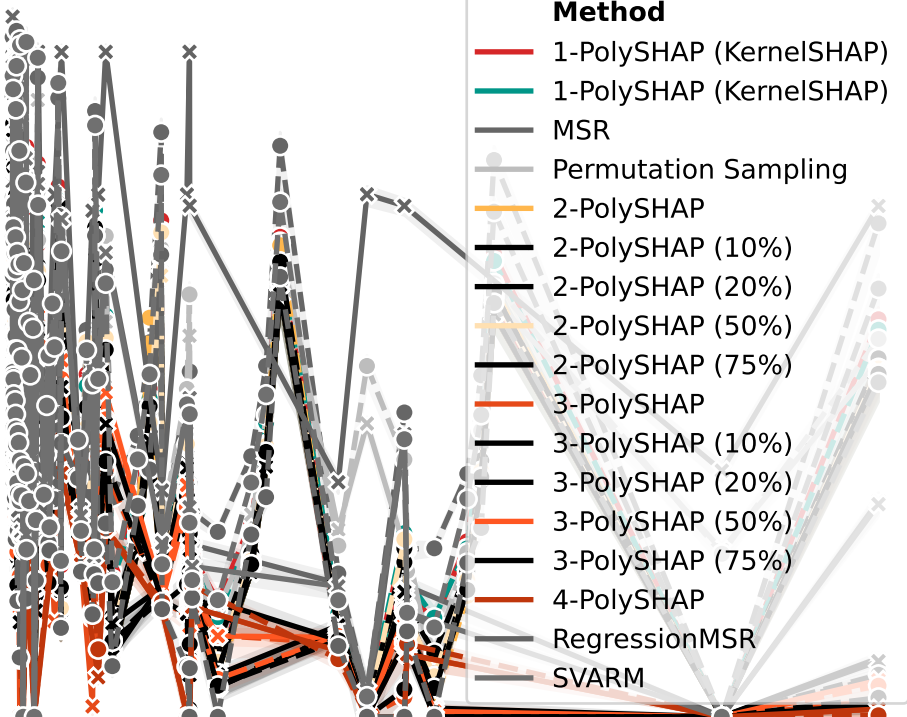

Supplement: supplementary_material [file legend.pdf › shapiq/experiments/plots/legend.pdf]

# Cancer ( $d = 30$ )

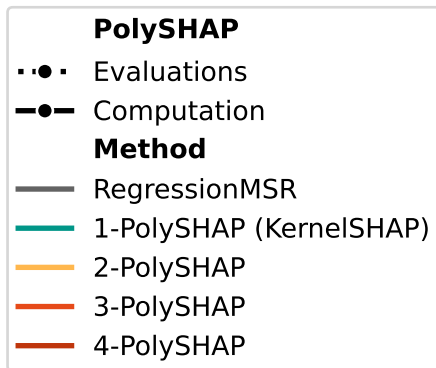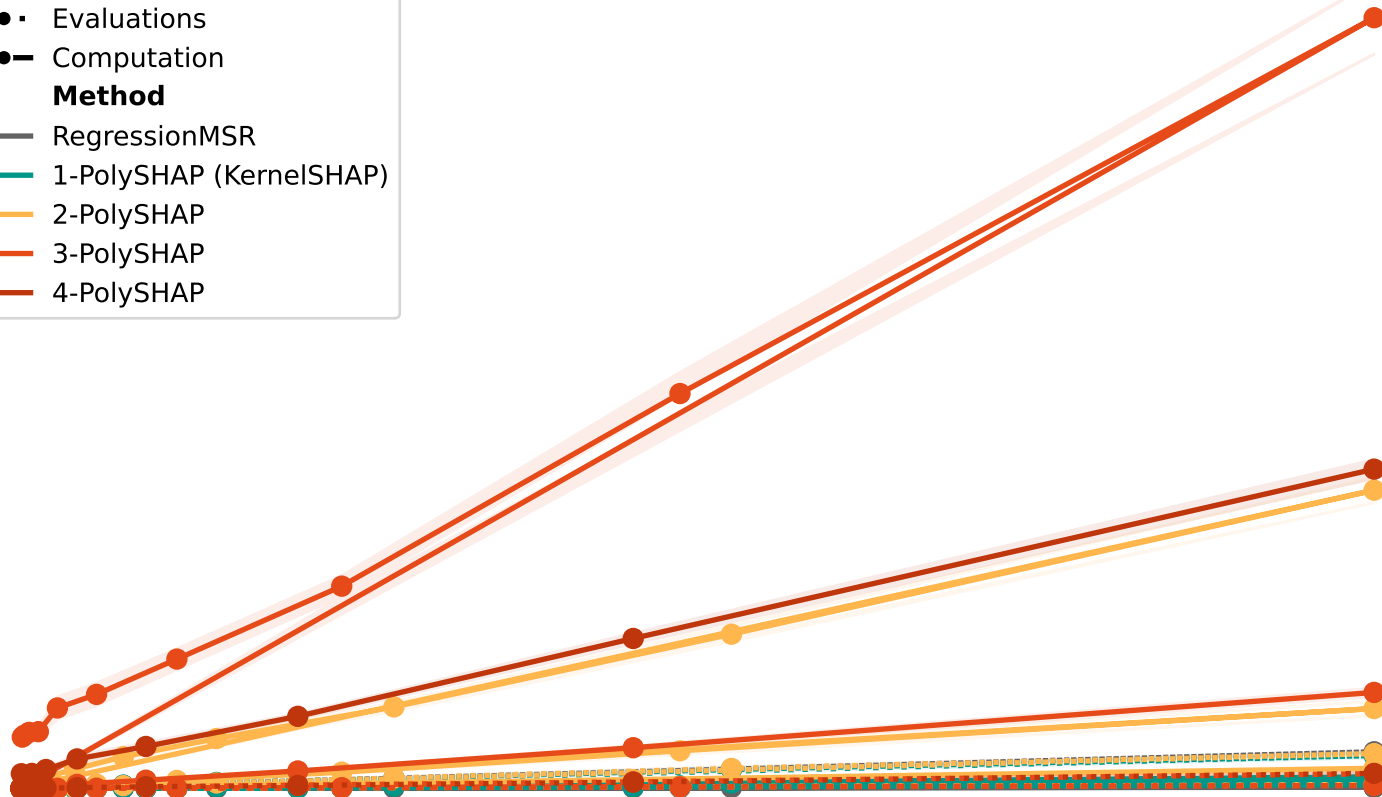

Supplement: supplementary_material [file legend_runtime.pdf › shapiq/experiments/plots/legend_runtime.pdf]

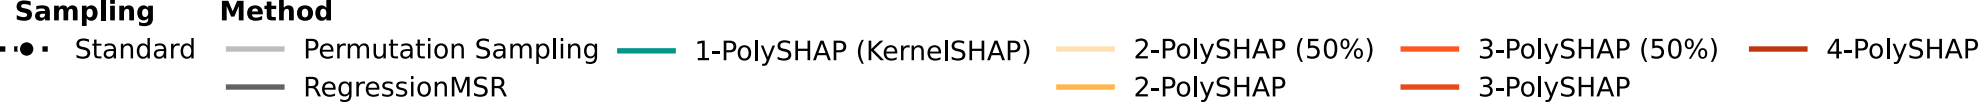

Supplement: supplementary_material [file legend_standard.pdf › shapiq/experiments/plots/legend_standard.pdf]

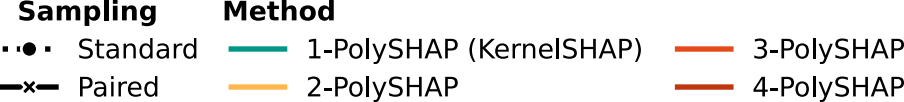

Supplement: supplementary_material [file legend_standard_vs_paired.pdf › shapiq/experiments/plots/legend_standard_vs_paired.pdf]

# Adult ( $d = 14$ )

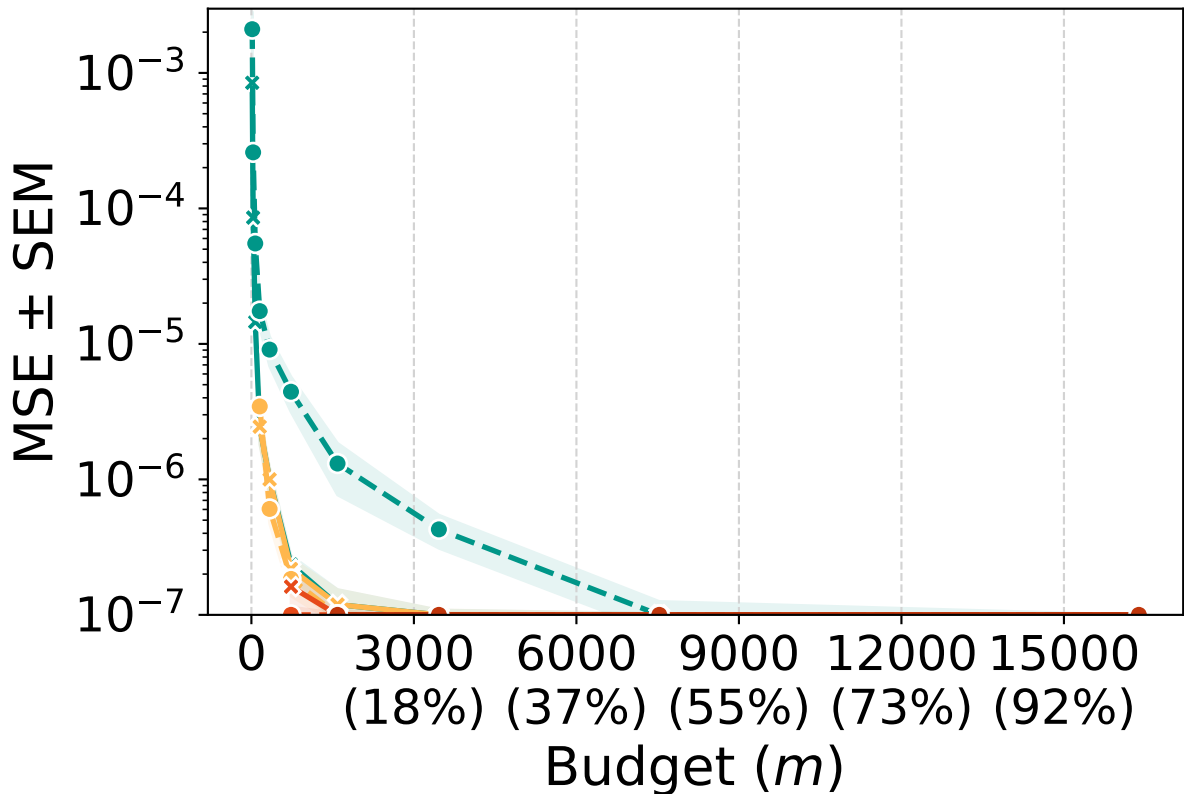

Supplement: supplementary_material [file adult_census_random_forest_MSE_paired_vs_standard.pdf › shapiq/experiments/plots/pathdependent/adult_census_random_forest_MSE_paired_vs_standard.pdf]

# Adult ( $d = 14$ )

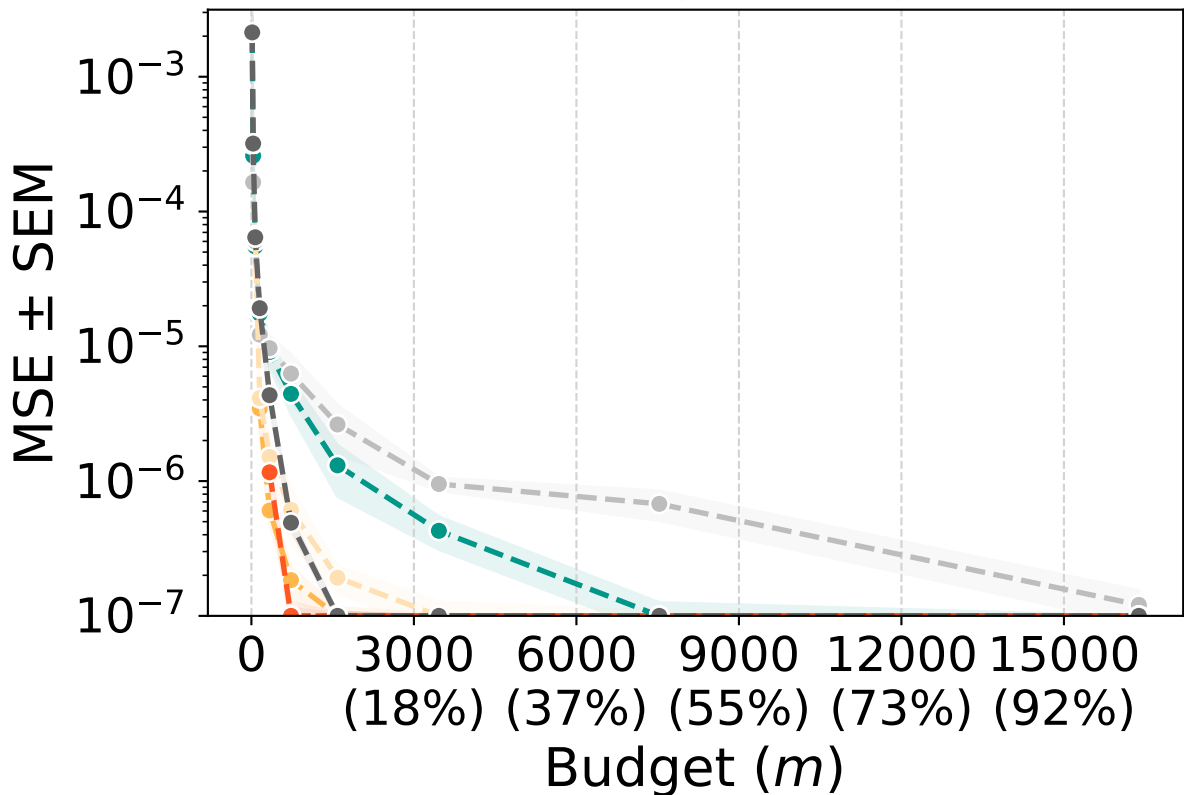

Supplement: supplementary_material [file adult_census_random_forest_MSE_standard.pdf › shapiq/experiments/plots/pathdependent/adult_census_random_forest_MSE_standard.pdf]

# Adult ( $d = 14$ )

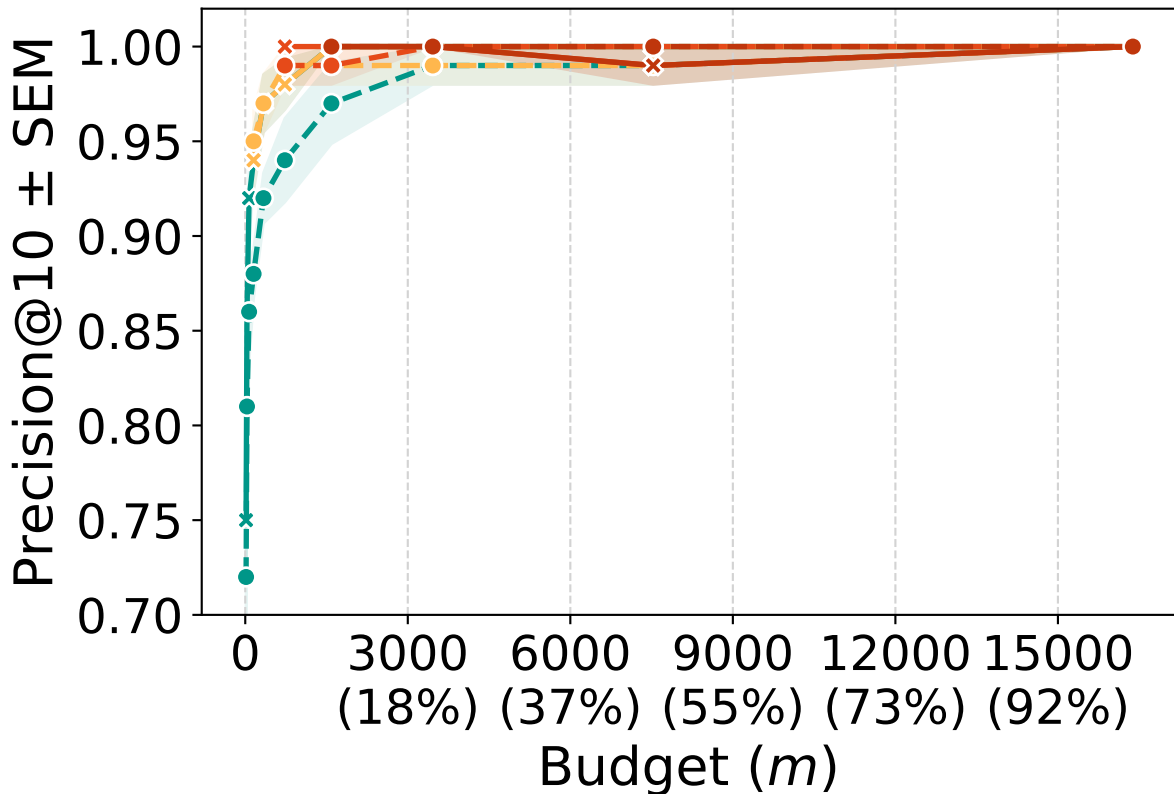

Supplement: supplementary_material [file adult_census_random_forest_Precision@10_paired_vs_standard.pdf › shapiq/experiments/plots/pathdependent/adult_census_random_forest_Precision@10_paired_vs_standard.pdf]

# Adult ( $d = 14$ )

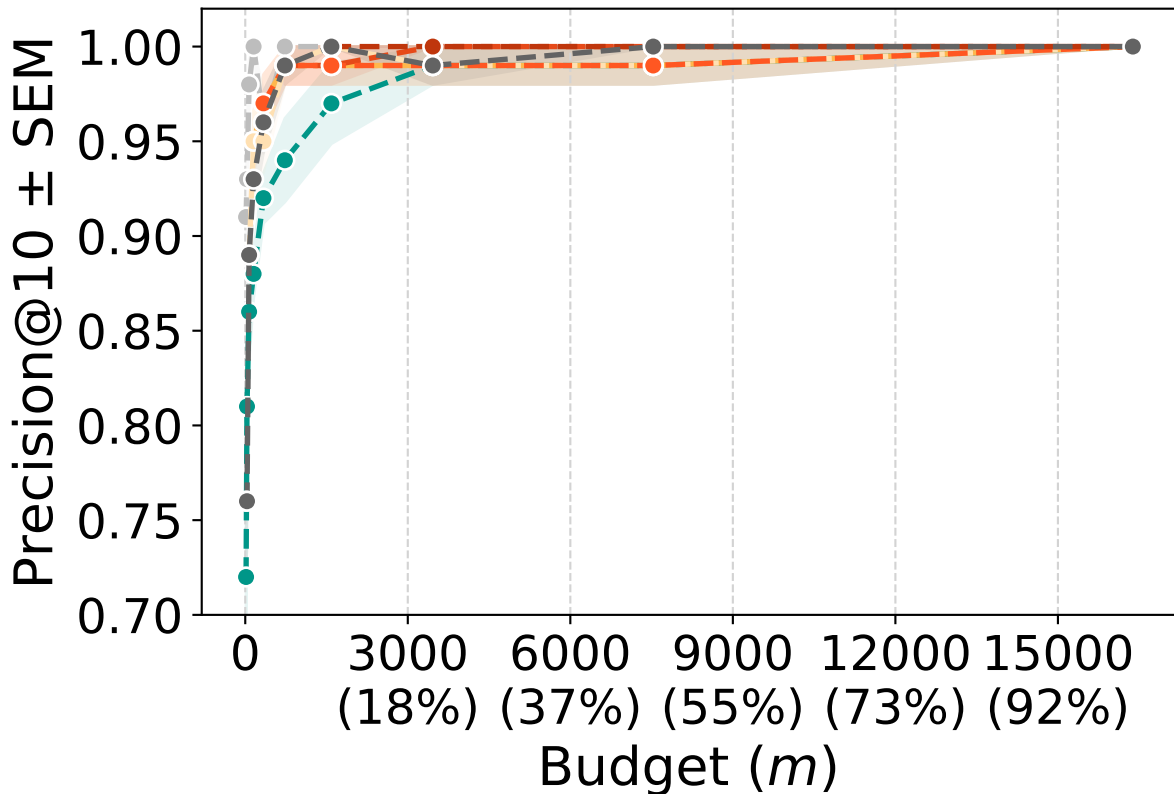

Supplement: supplementary_material [file adult_census_random_forest_Precision@10_standard.pdf › shapiq/experiments/plots/pathdependent/adult_census_random_forest_Precision@10_standard.pdf]

# Adult ( $d = 14$ )

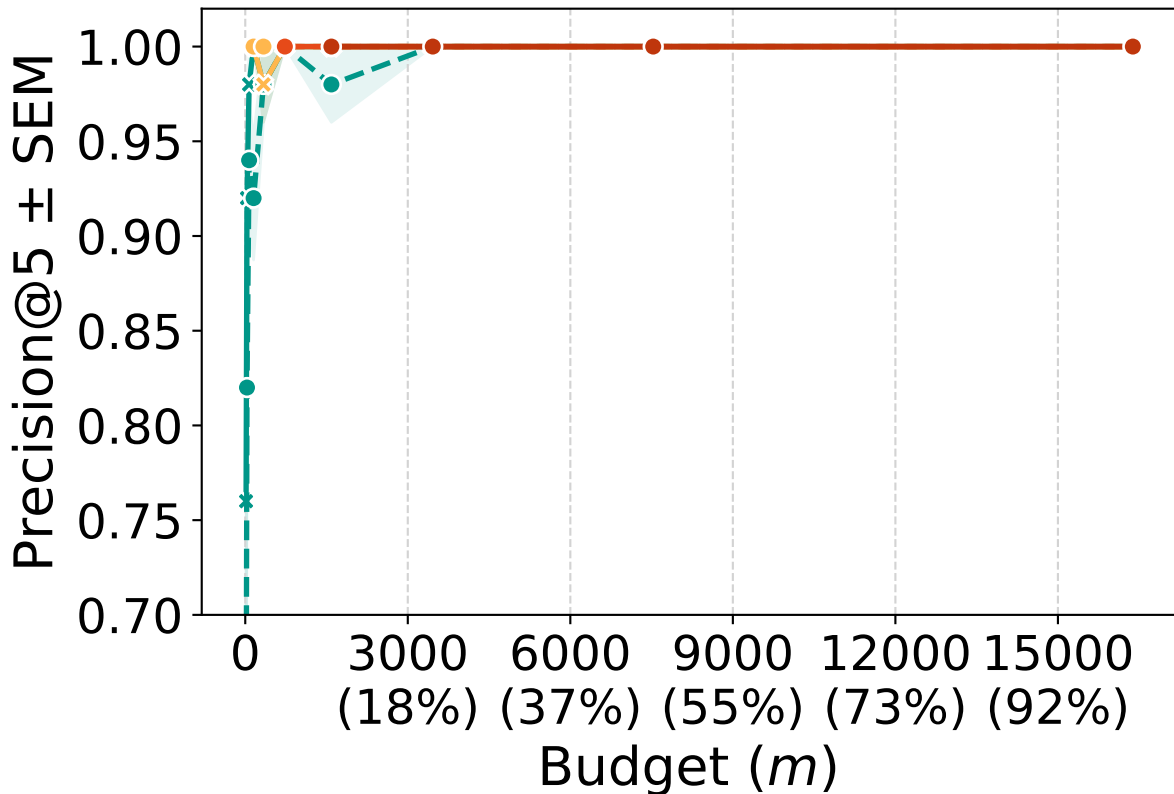

Supplement: supplementary_material [file adult_census_random_forest_Precision@5_paired_vs_standard.pdf › shapiq/experiments/plots/pathdependent/adult_census_random_forest_Precision@5_paired_vs_standard.pdf]

# Adult ( $d = 14$ )

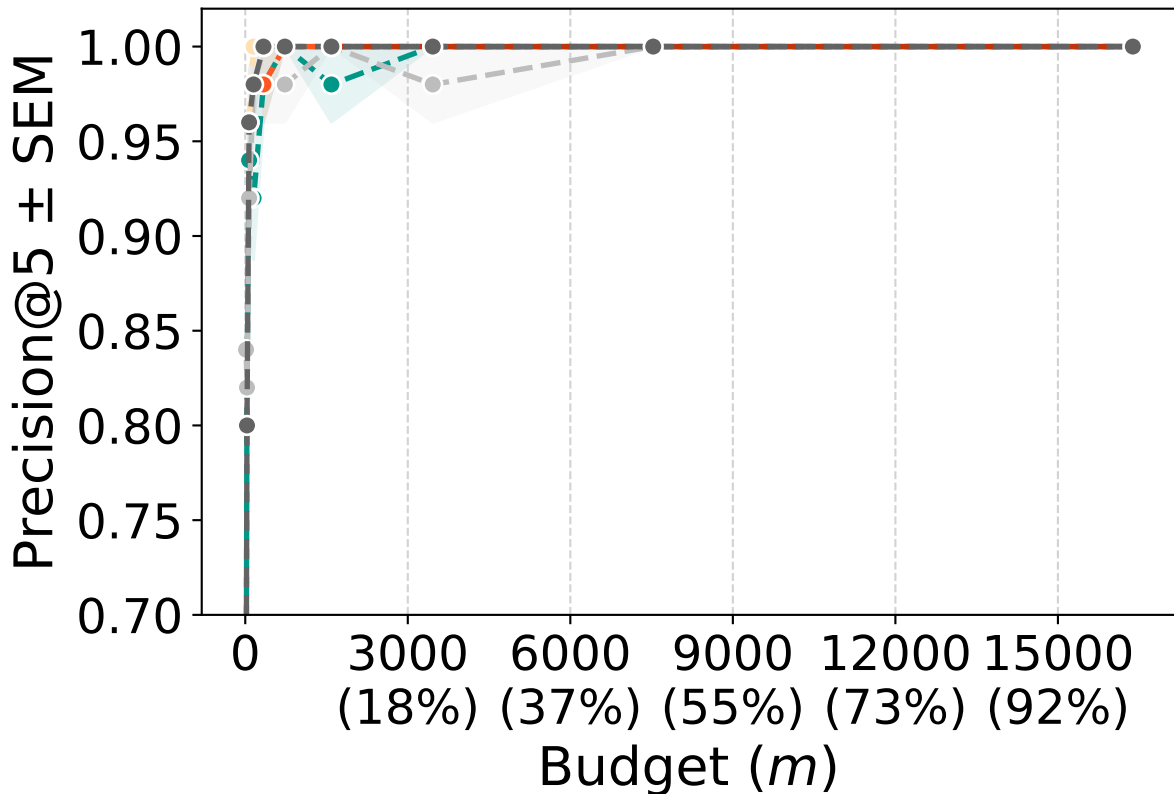

Supplement: supplementary_material [file adult_census_random_forest_Precision@5_standard.pdf › shapiq/experiments/plots/pathdependent/adult_census_random_forest_Precision@5_standard.pdf]

# Adult ( $d = 14$ )

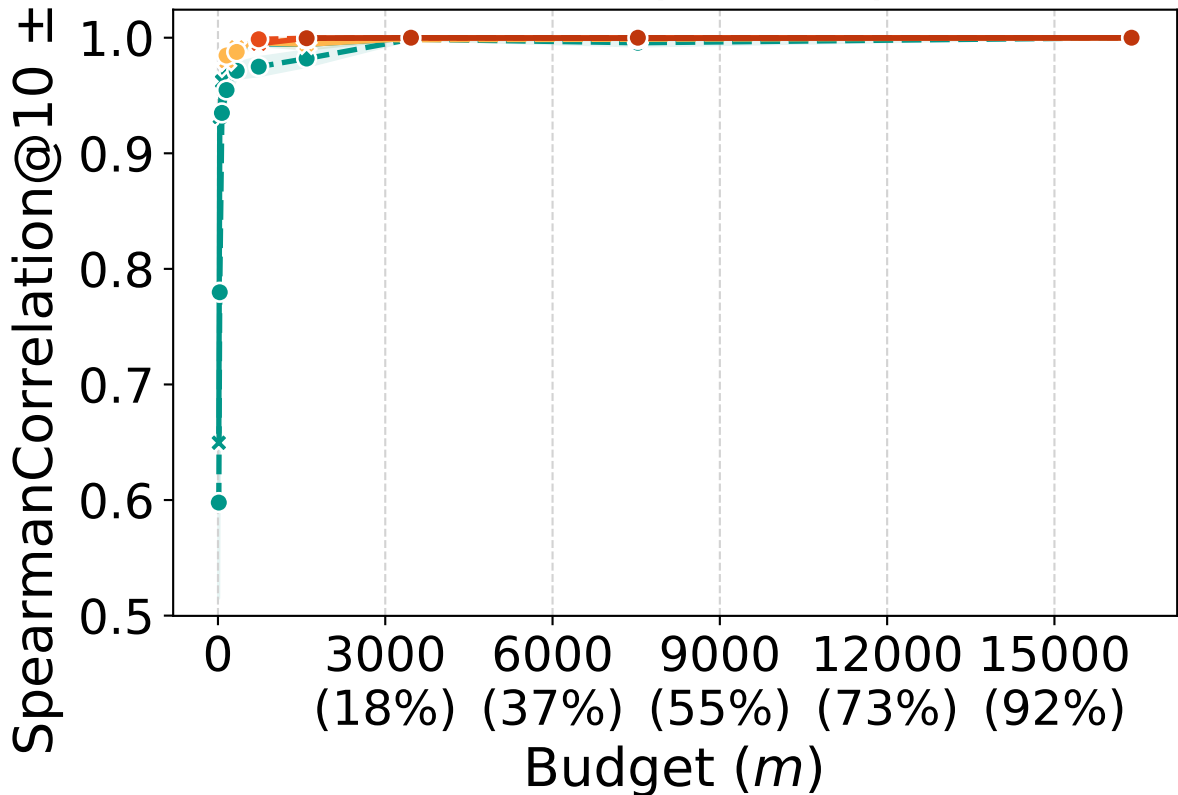

Supplement: supplementary_material [file adult_census_random_forest_SpearmanCorrelation@10_paired_vs_standard.pdf › shapiq/experiments/plots/pathdependent/adult_census_random_forest_SpearmanCorrelation@10_paired_vs_standard.pdf]

# Adult ( $d = 14$ )

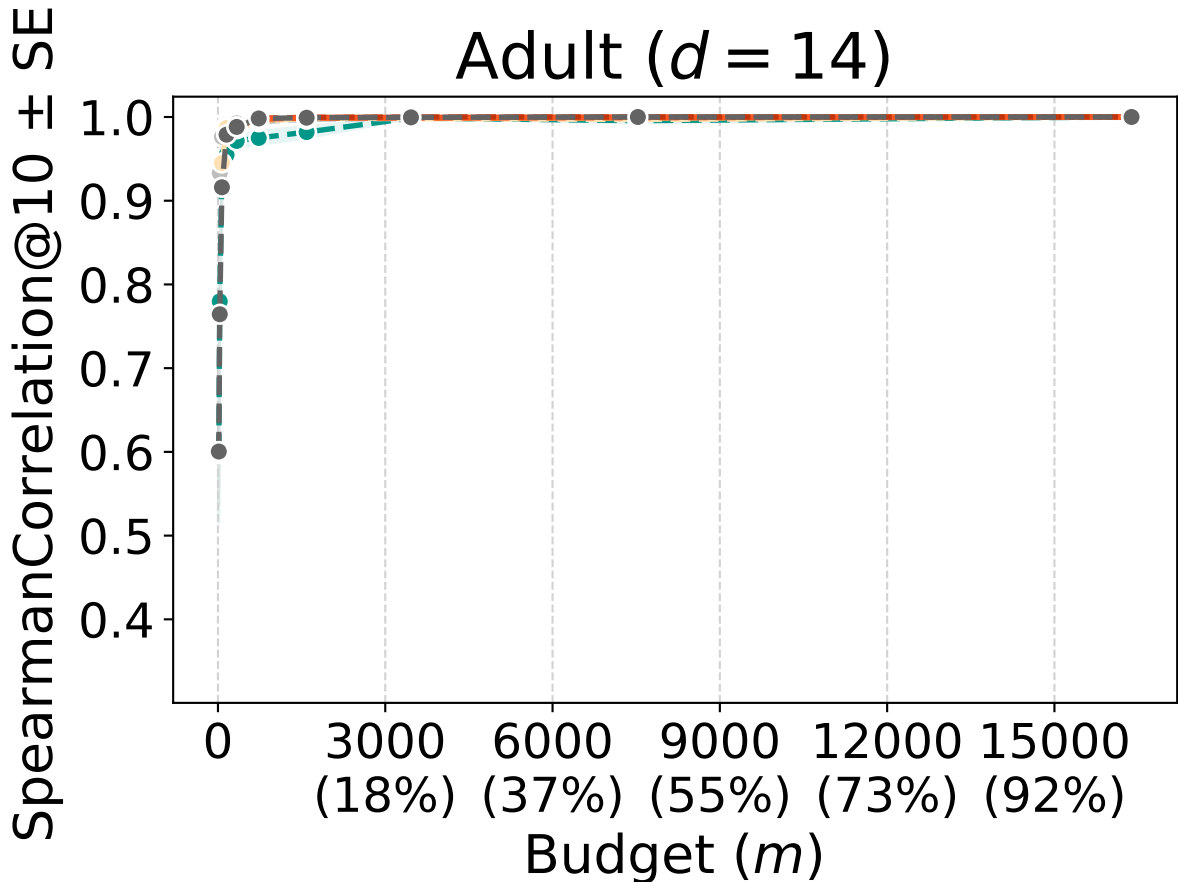

Supplement: supplementary_material [file adult_census_random_forest_SpearmanCorrelation@10_standard.pdf › shapiq/experiments/plots/pathdependent/adult_census_random_forest_SpearmanCorrelation@10_standard.pdf]

# Adult ( $d = 14$ )

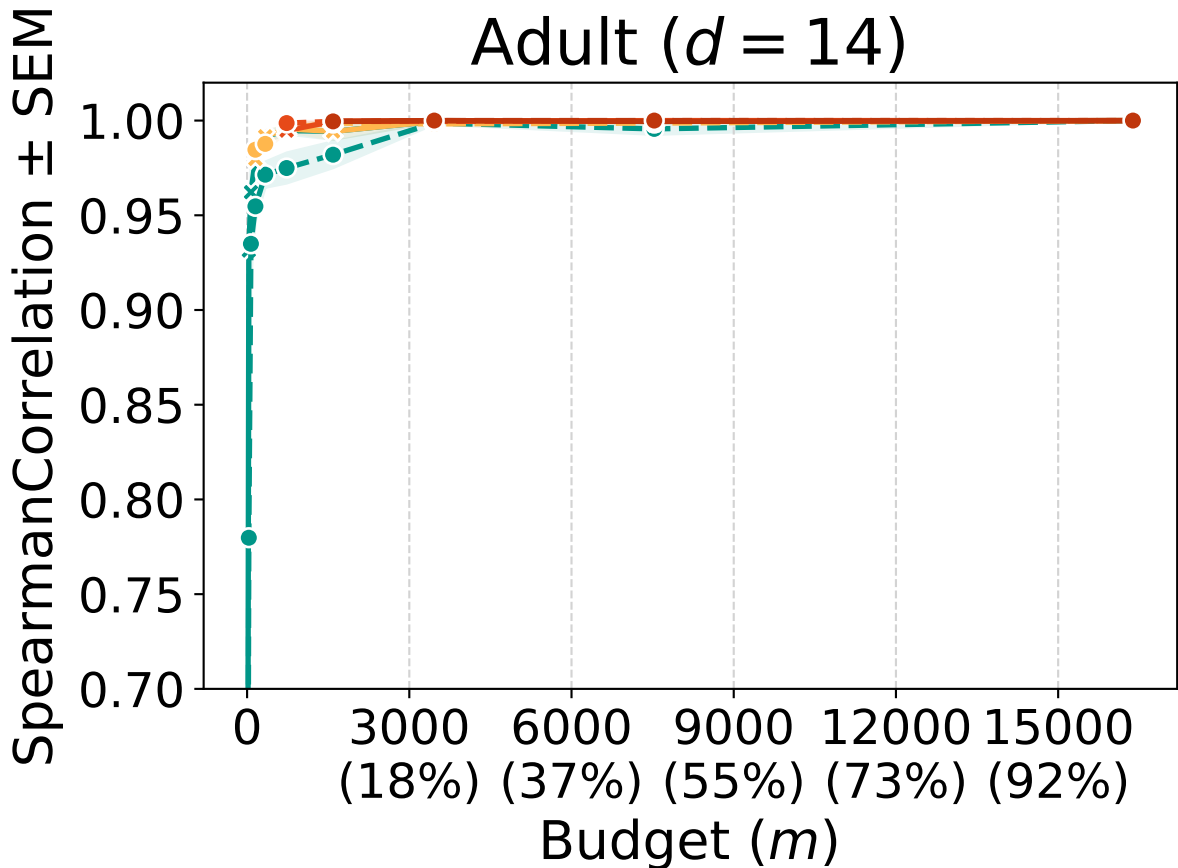

Supplement: supplementary_material [file adult_census_random_forest_SpearmanCorrelation_paired_vs_standard.pdf › shapiq/experiments/plots/pathdependent/adult_census_random_forest_SpearmanCorrelation_paired_vs_standard.pdf]

# Adult ( $d = 14$ )

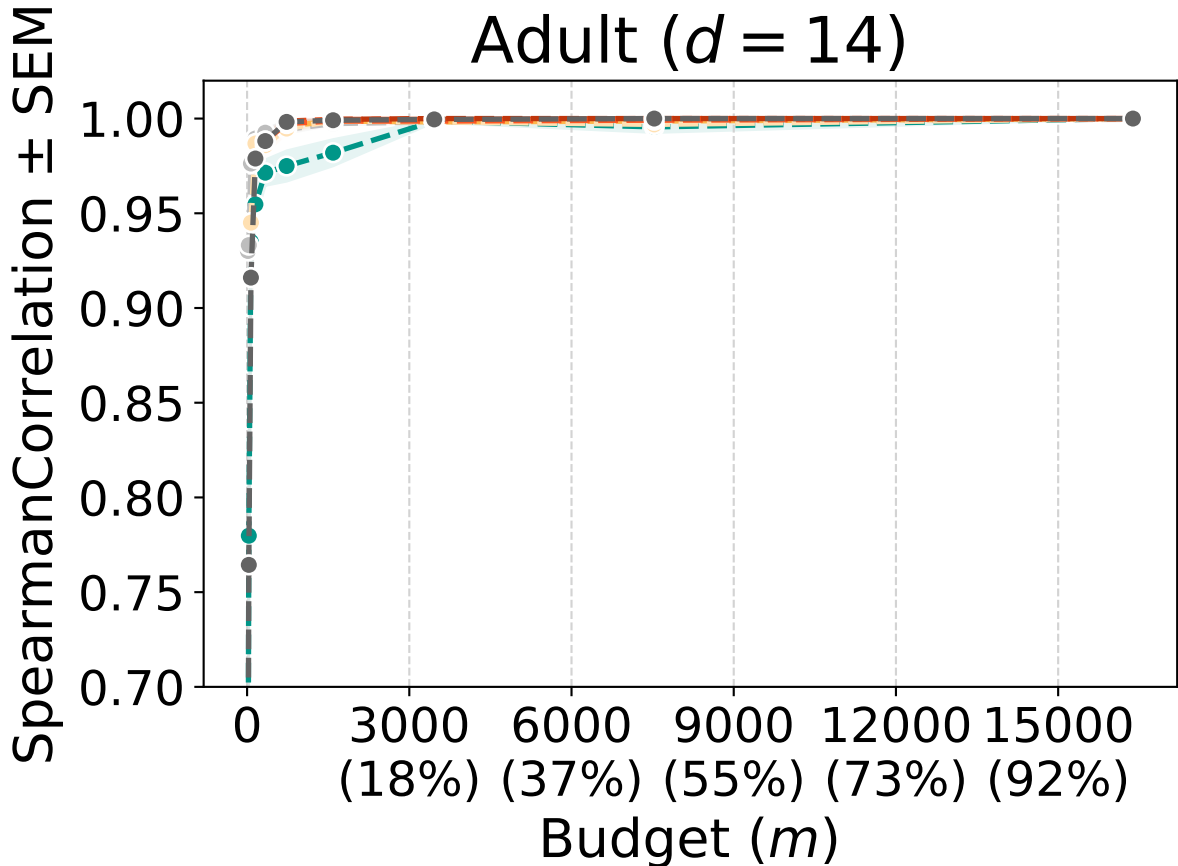

Supplement: supplementary_material [file adult_census_random_forest_SpearmanCorrelation_standard.pdf › shapiq/experiments/plots/pathdependent/adult_census_random_forest_SpearmanCorrelation_standard.pdf]

# Bike ( $d = 12$ )

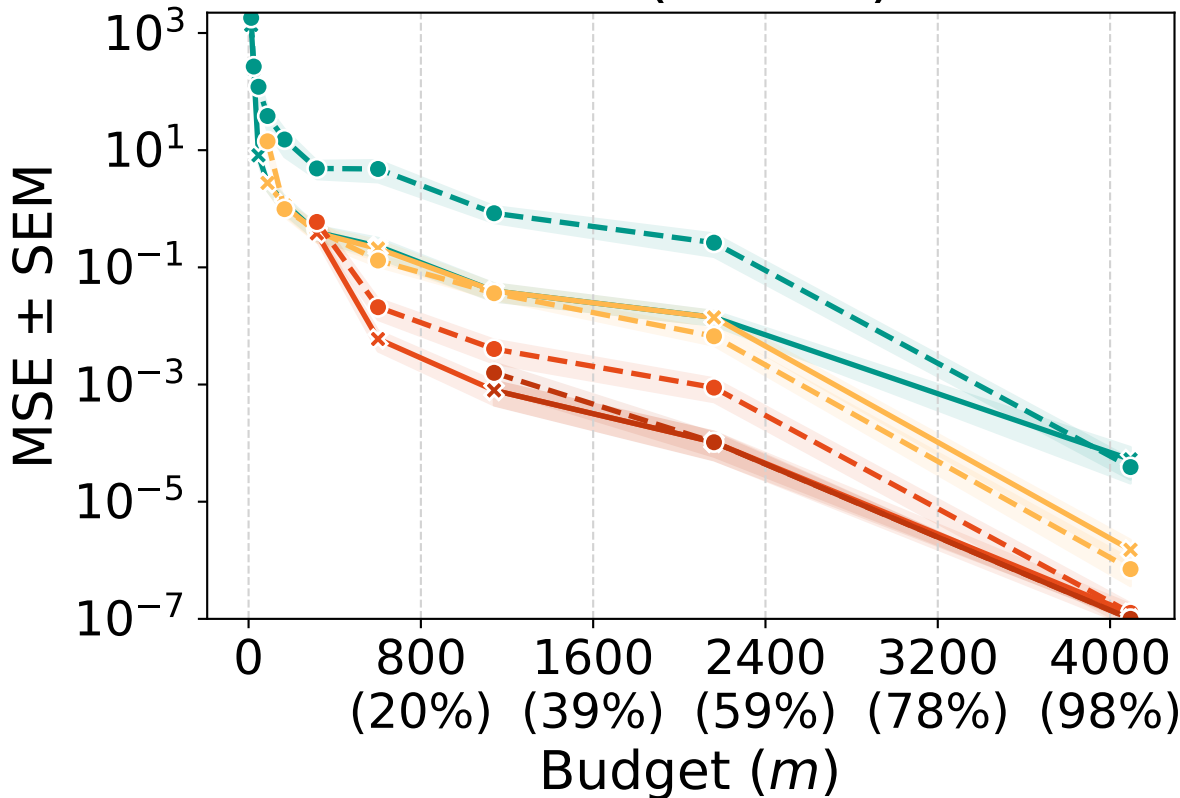

Supplement: supplementary_material [file bike_sharing_random_forest_MSE_paired_vs_standard.pdf › shapiq/experiments/plots/pathdependent/bike_sharing_random_forest_MSE_paired_vs_standard.pdf]

# Bike ( $d = 12$ )

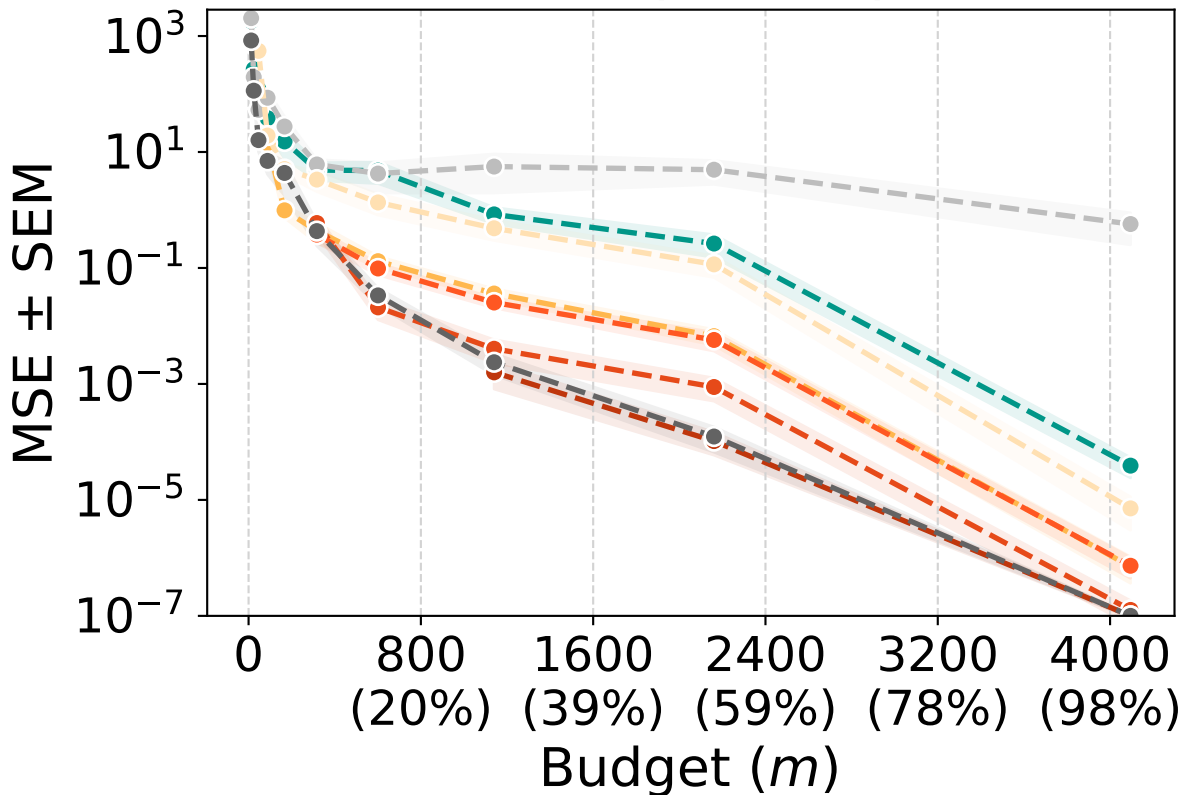

Supplement: supplementary_material [file bike_sharing_random_forest_MSE_standard.pdf › shapiq/experiments/plots/pathdependent/bike_sharing_random_forest_MSE_standard.pdf]

# Bike ( $d = 12$ )

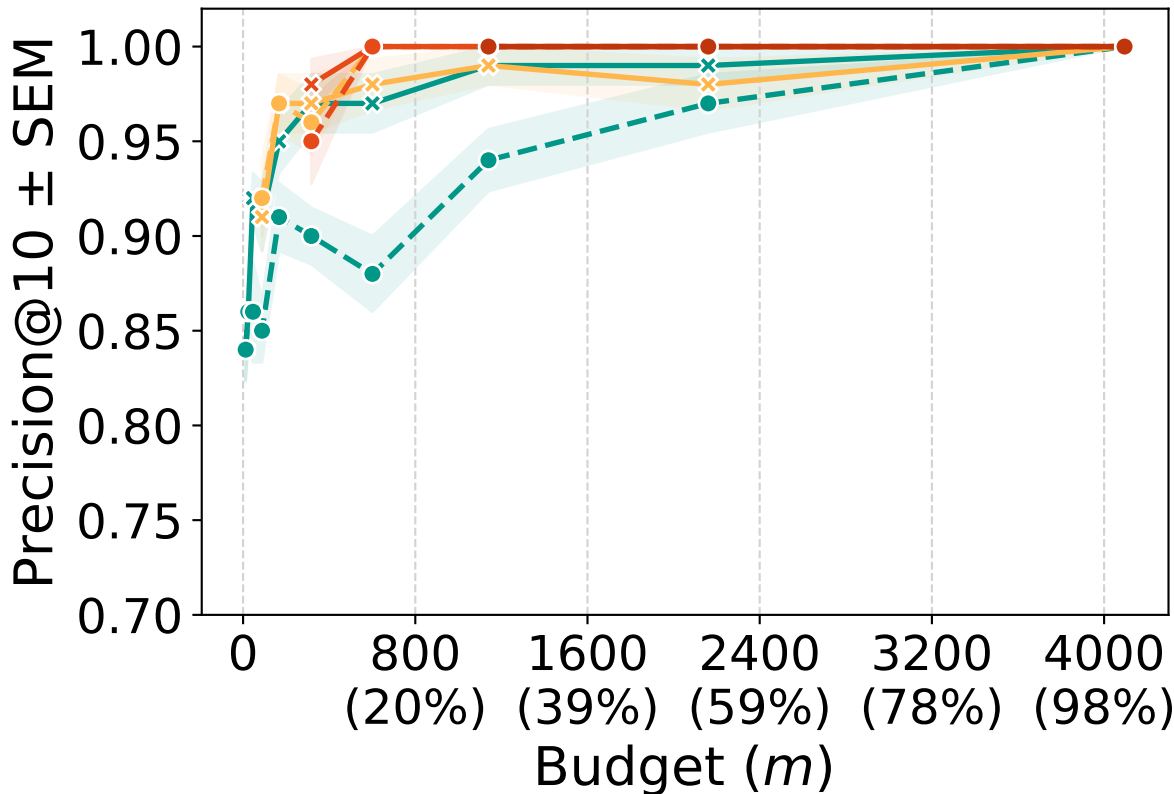

Supplement: supplementary_material [file bike_sharing_random_forest_Precision@10_paired_vs_standard.pdf › shapiq/experiments/plots/pathdependent/bike_sharing_random_forest_Precision@10_paired_vs_standard.pdf]

# Bike ( $d = 12$ )

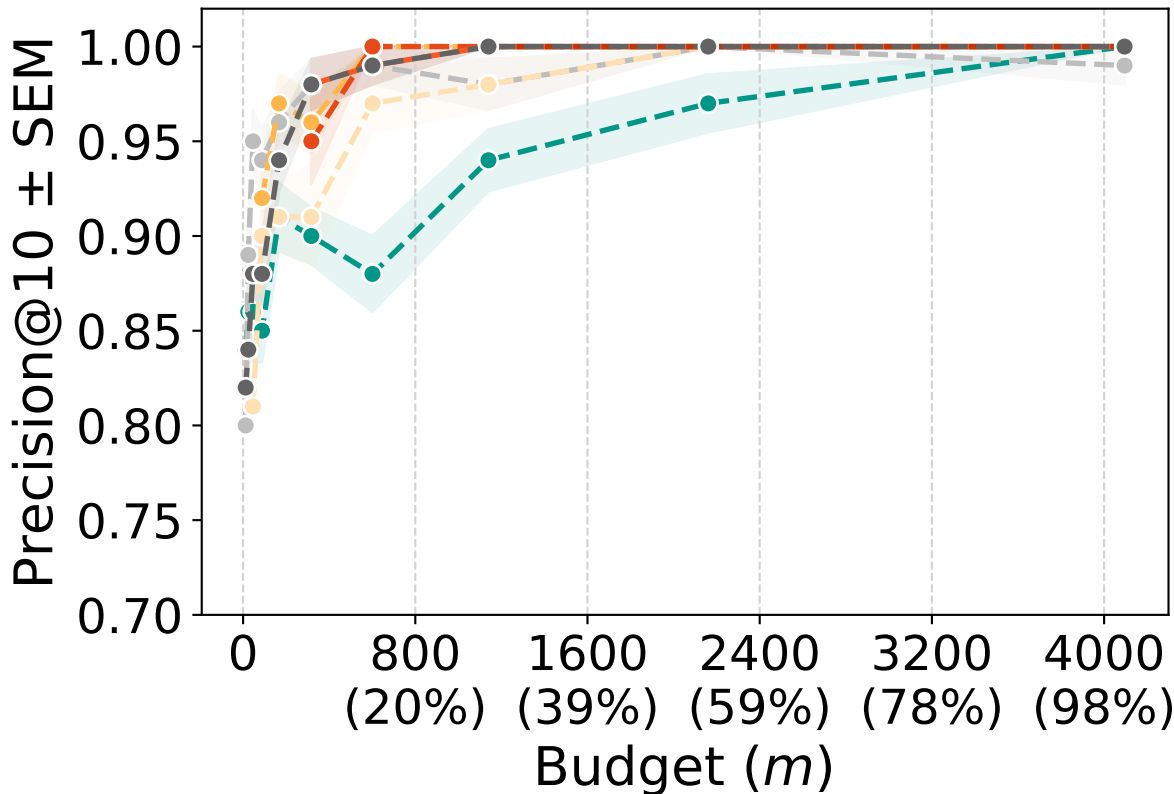

Supplement: supplementary_material [file bike_sharing_random_forest_Precision@10_standard.pdf › shapiq/experiments/plots/pathdependent/bike_sharing_random_forest_Precision@10_standard.pdf]

# Bike ( $d = 12$ )

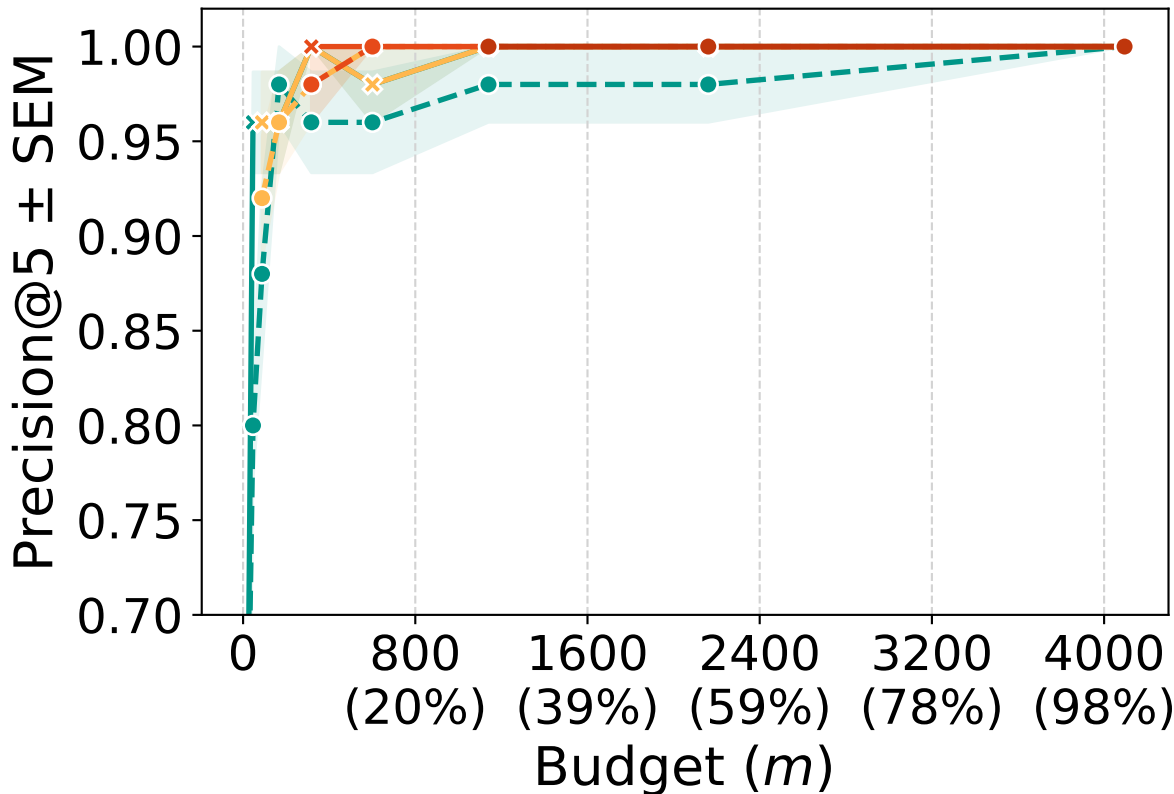

Supplement: supplementary_material [file bike_sharing_random_forest_Precision@5_paired_vs_standard.pdf › shapiq/experiments/plots/pathdependent/bike_sharing_random_forest_Precision@5_paired_vs_standard.pdf]

# Bike ( $d = 12$ )

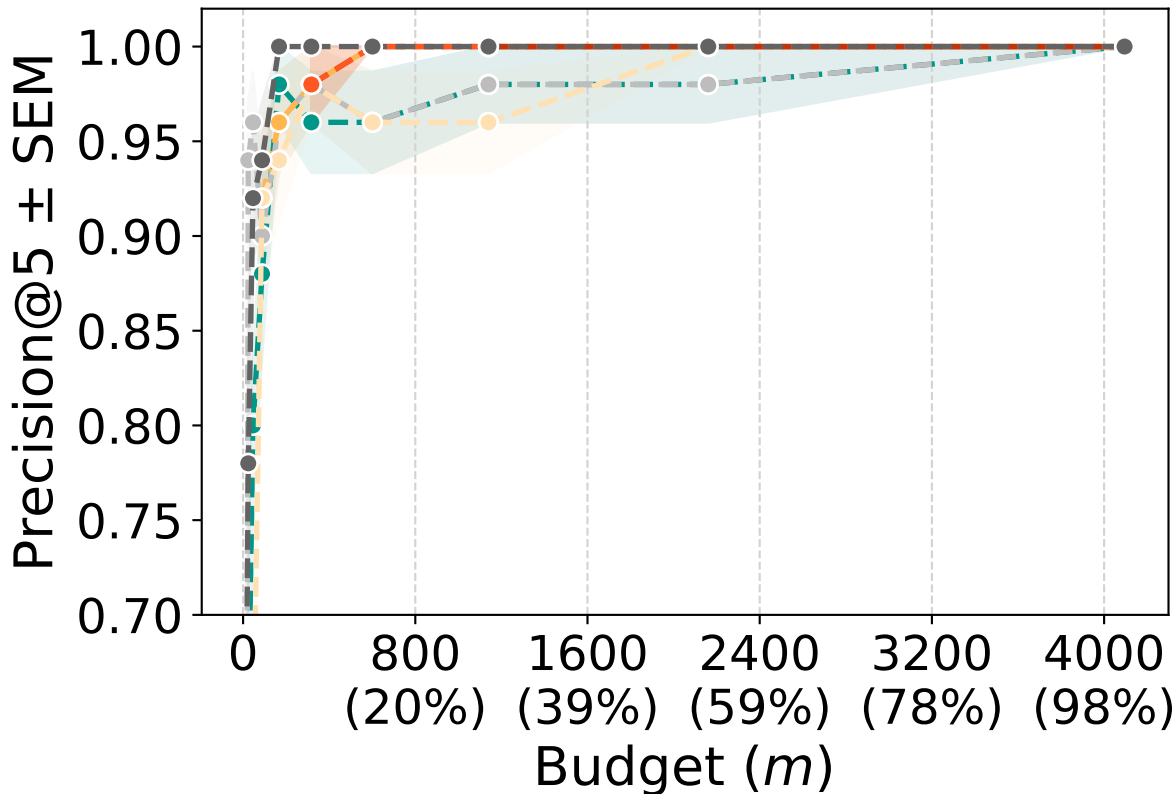

Supplement: supplementary_material [file bike_sharing_random_forest_Precision@5_standard.pdf › shapiq/experiments/plots/pathdependent/bike_sharing_random_forest_Precision@5_standard.pdf]

# Bike ( $d = 12$ )

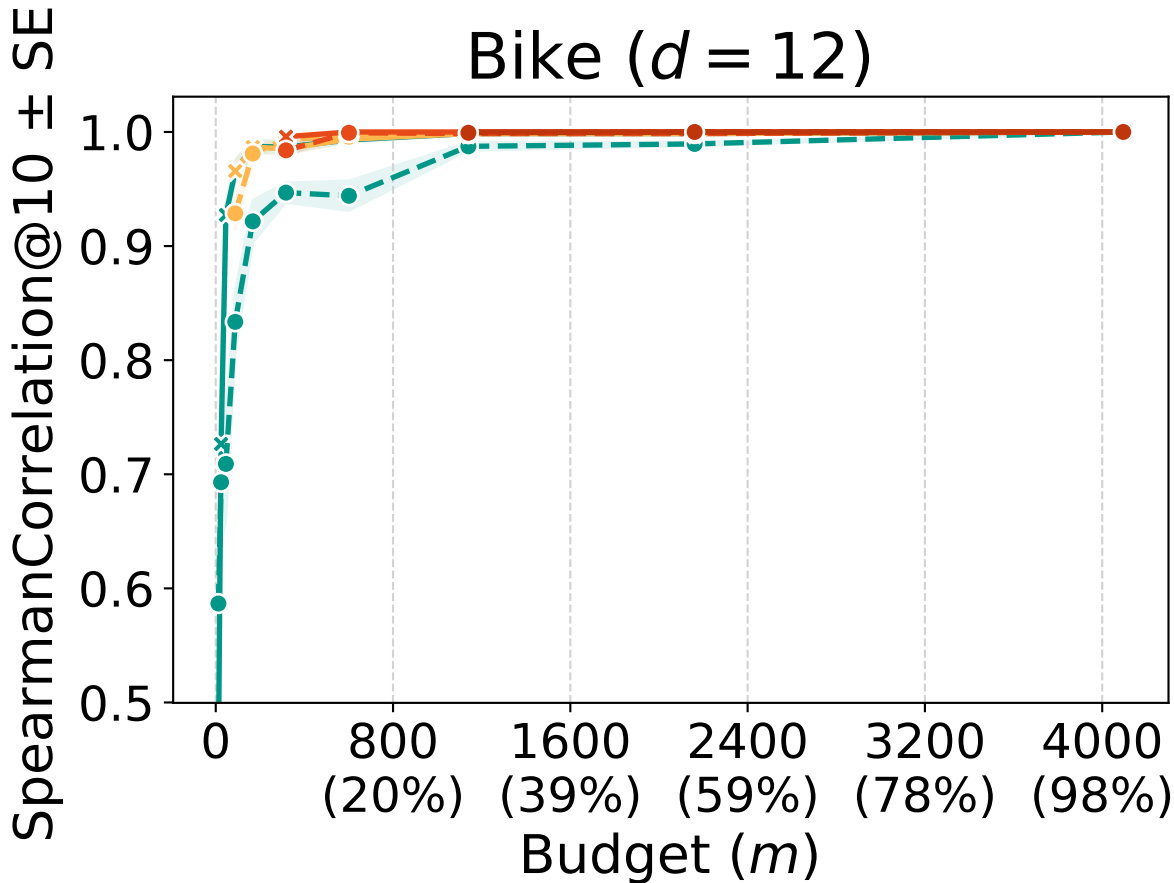

Supplement: supplementary_material [file bike_sharing_random_forest_SpearmanCorrelation@10_paired_vs_standard.pdf › shapiq/experiments/plots/pathdependent/bike_sharing_random_forest_SpearmanCorrelation@10_paired_vs_standard.pdf]

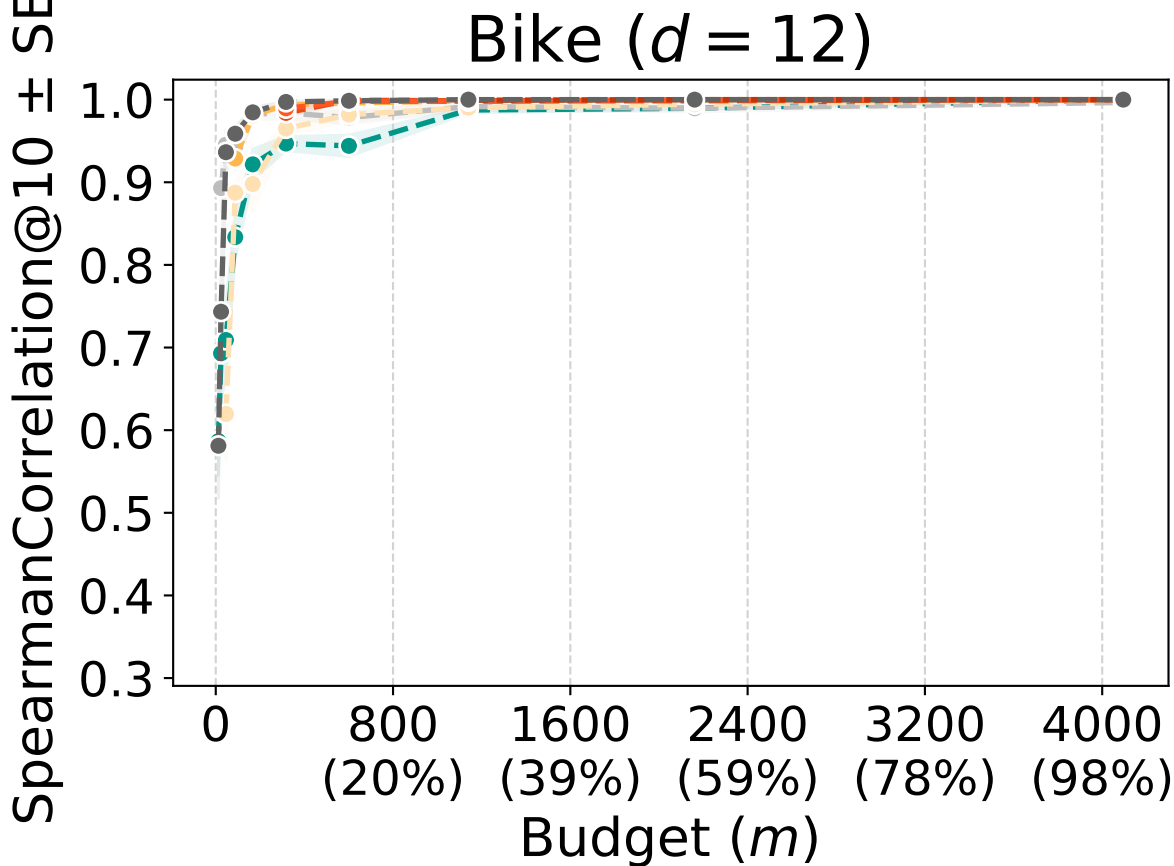

Supplement: supplementary_material [file bike_sharing_random_forest_SpearmanCorrelation@10_standard.pdf › shapiq/experiments/plots/pathdependent/bike_sharing_random_forest_SpearmanCorrelation@10_standard.pdf]

# Bike ( $d = 12$ )

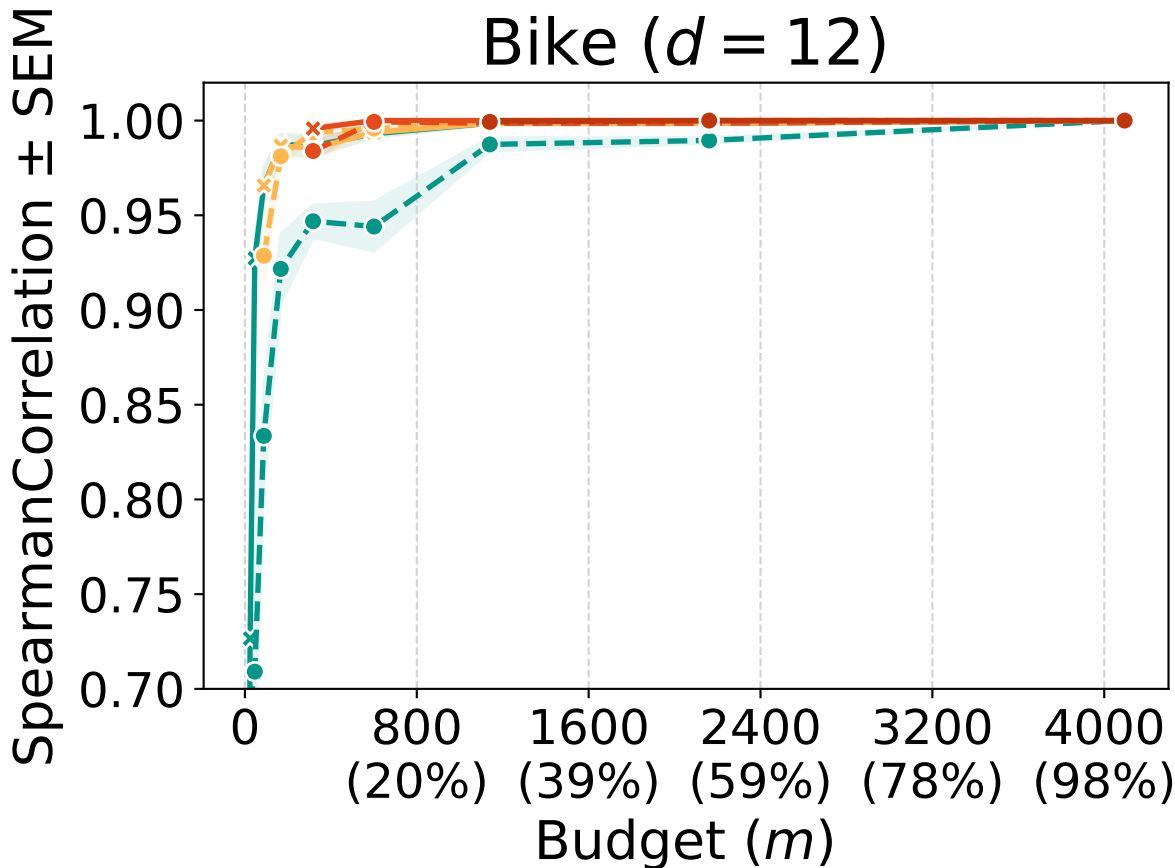

Supplement: supplementary_material [file bike_sharing_random_forest_SpearmanCorrelation_paired_vs_standard.pdf › shapiq/experiments/plots/pathdependent/bike_sharing_random_forest_SpearmanCorrelation_paired_vs_standard.pdf]

# Bike ( $d = 12$ )

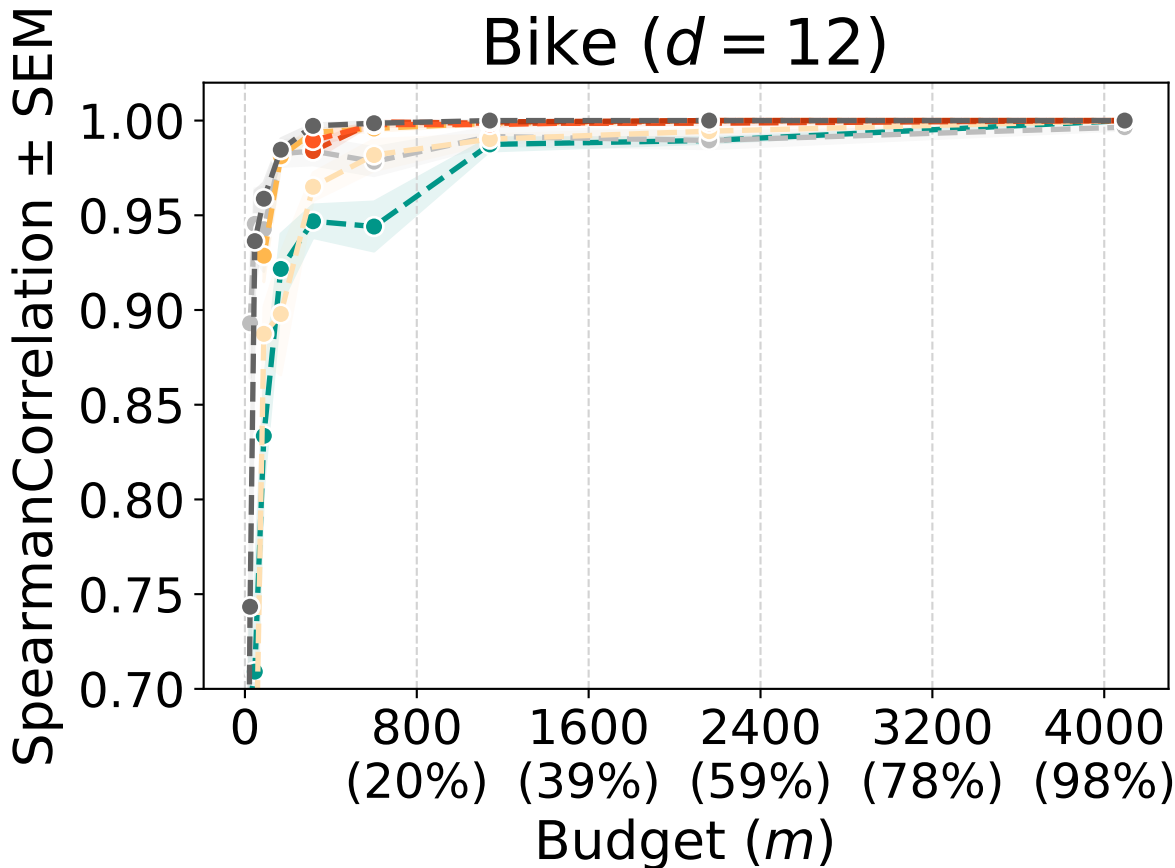

Supplement: supplementary_material [file bike_sharing_random_forest_SpearmanCorrelation_standard.pdf › shapiq/experiments/plots/pathdependent/bike_sharing_random_forest_SpearmanCorrelation_standard.pdf]

# Cancer ( $d = 30$ )

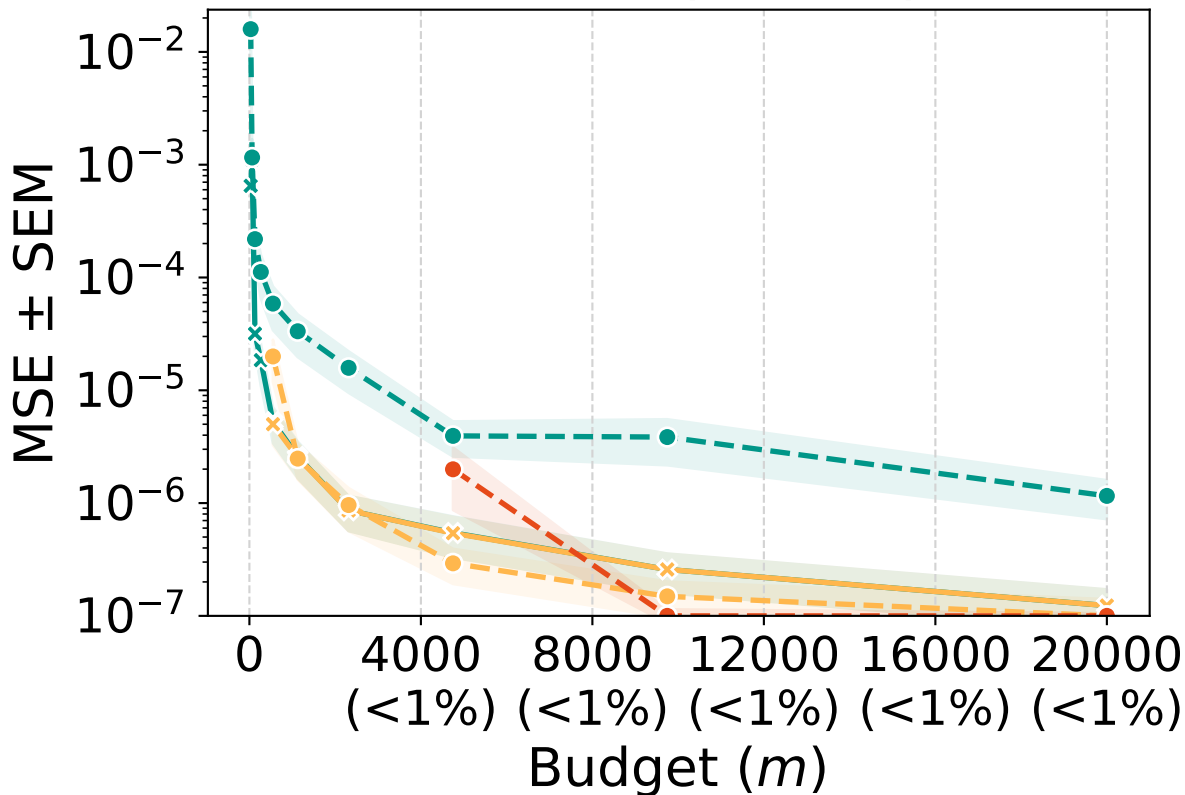

Supplement: supplementary_material [file breast_cancer_random_forest_MSE_paired_vs_standard.pdf › shapiq/experiments/plots/pathdependent/breast_cancer_random_forest_MSE_paired_vs_standard.pdf]

# Cancer ( $d = 30$ )

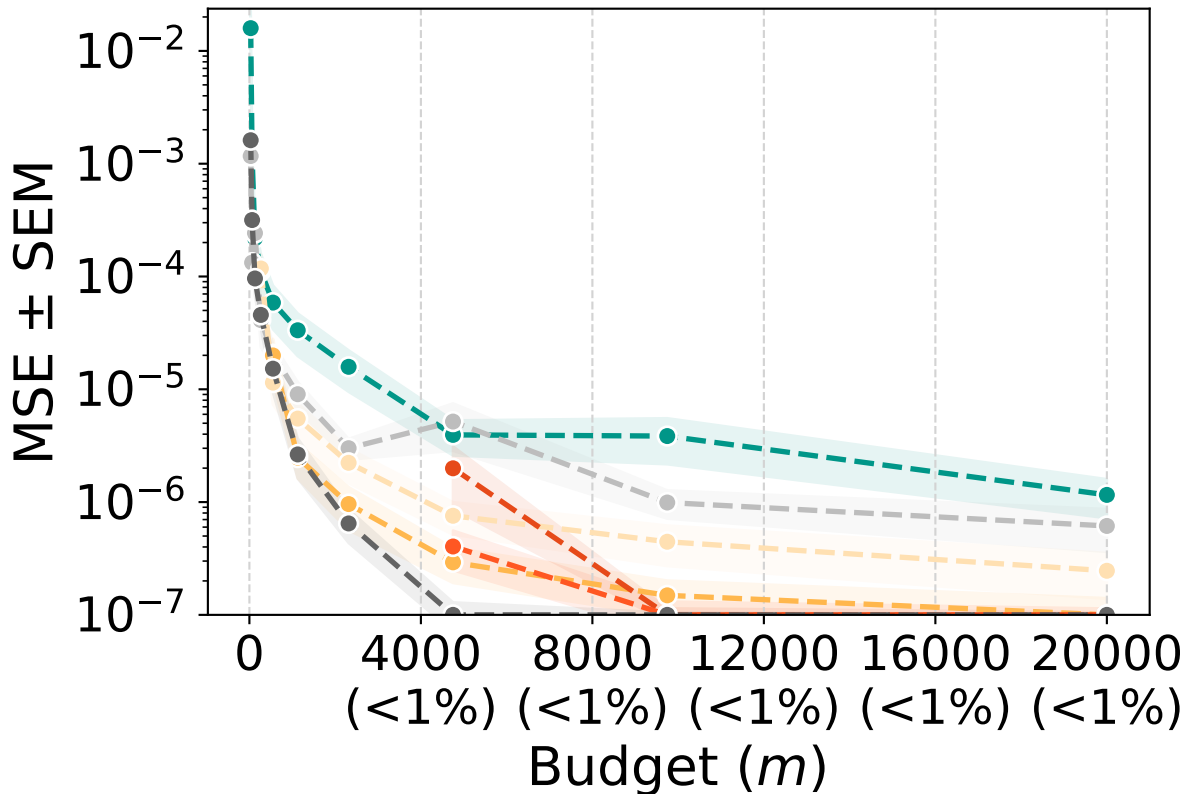

Supplement: supplementary_material [file breast_cancer_random_forest_MSE_standard.pdf › shapiq/experiments/plots/pathdependent/breast_cancer_random_forest_MSE_standard.pdf]

# Cancer ( $d = 30$ )

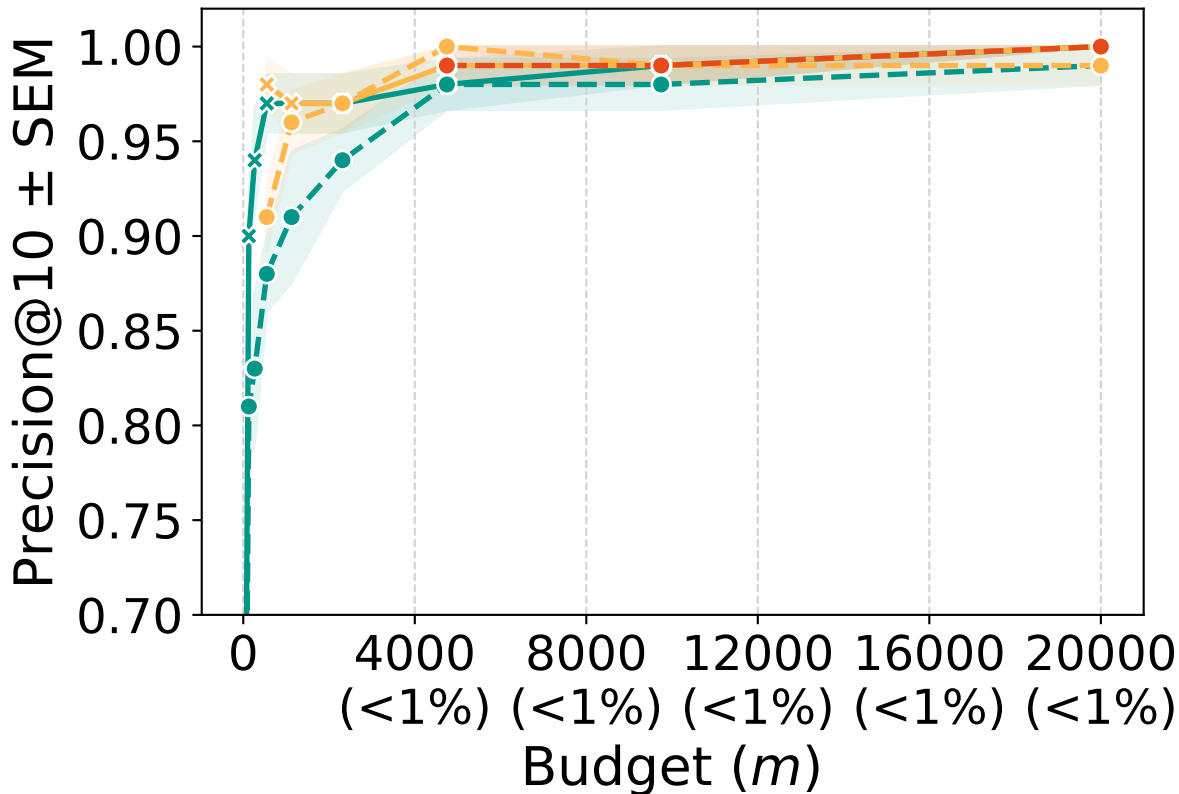

Supplement: supplementary_material [file breast_cancer_random_forest_Precision@10_paired_vs_standard.pdf › shapiq/experiments/plots/pathdependent/breast_cancer_random_forest_Precision@10_paired_vs_standard.pdf]

# Cancer ( $d = 30$ )

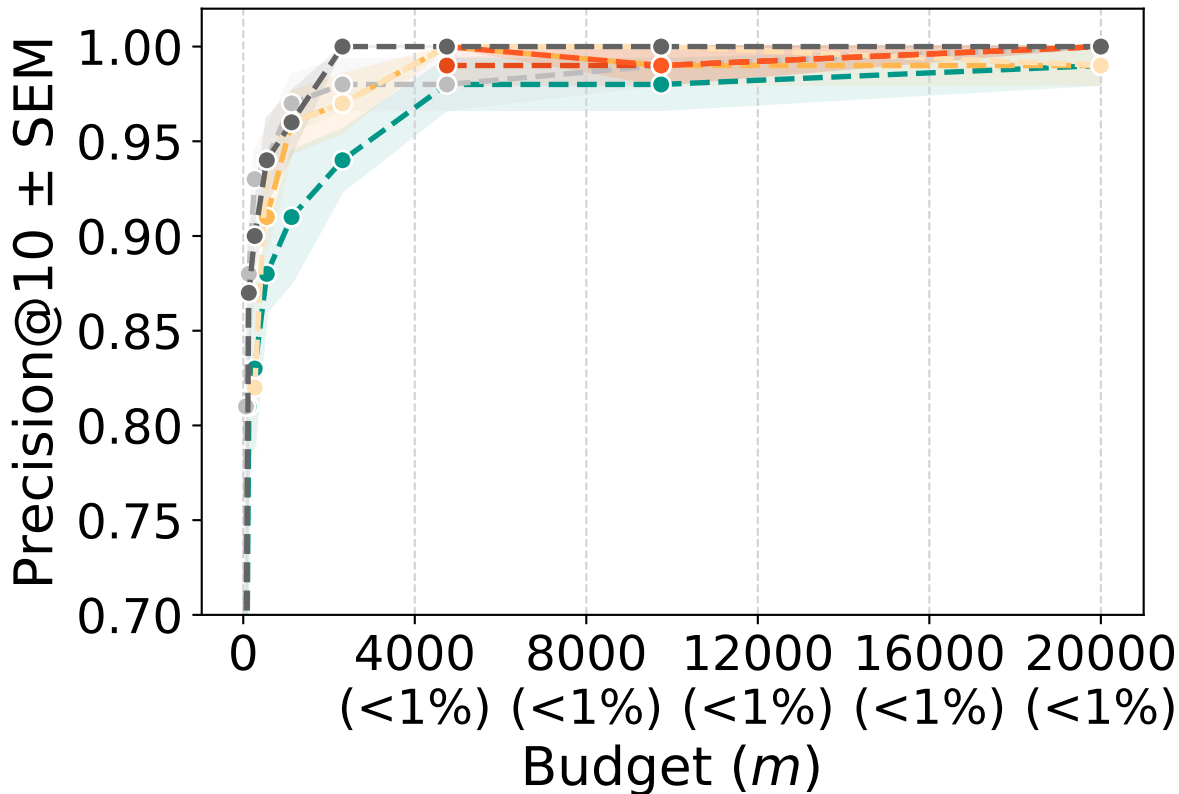

Supplement: supplementary_material [file breast_cancer_random_forest_Precision@10_standard.pdf › shapiq/experiments/plots/pathdependent/breast_cancer_random_forest_Precision@10_standard.pdf]

# Cancer ( $d = 30$ )

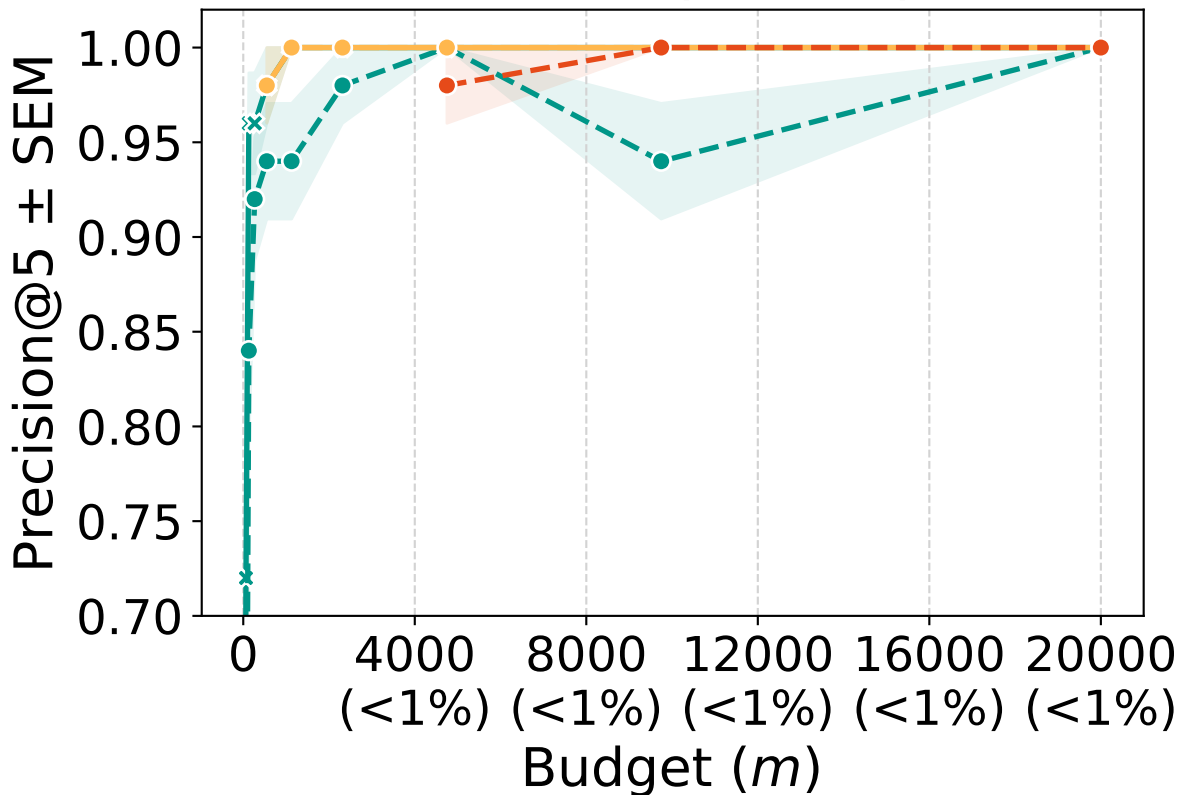

Supplement: supplementary_material [file breast_cancer_random_forest_Precision@5_paired_vs_standard.pdf › shapiq/experiments/plots/pathdependent/breast_cancer_random_forest_Precision@5_paired_vs_standard.pdf]

# Cancer ( $d = 30$ )

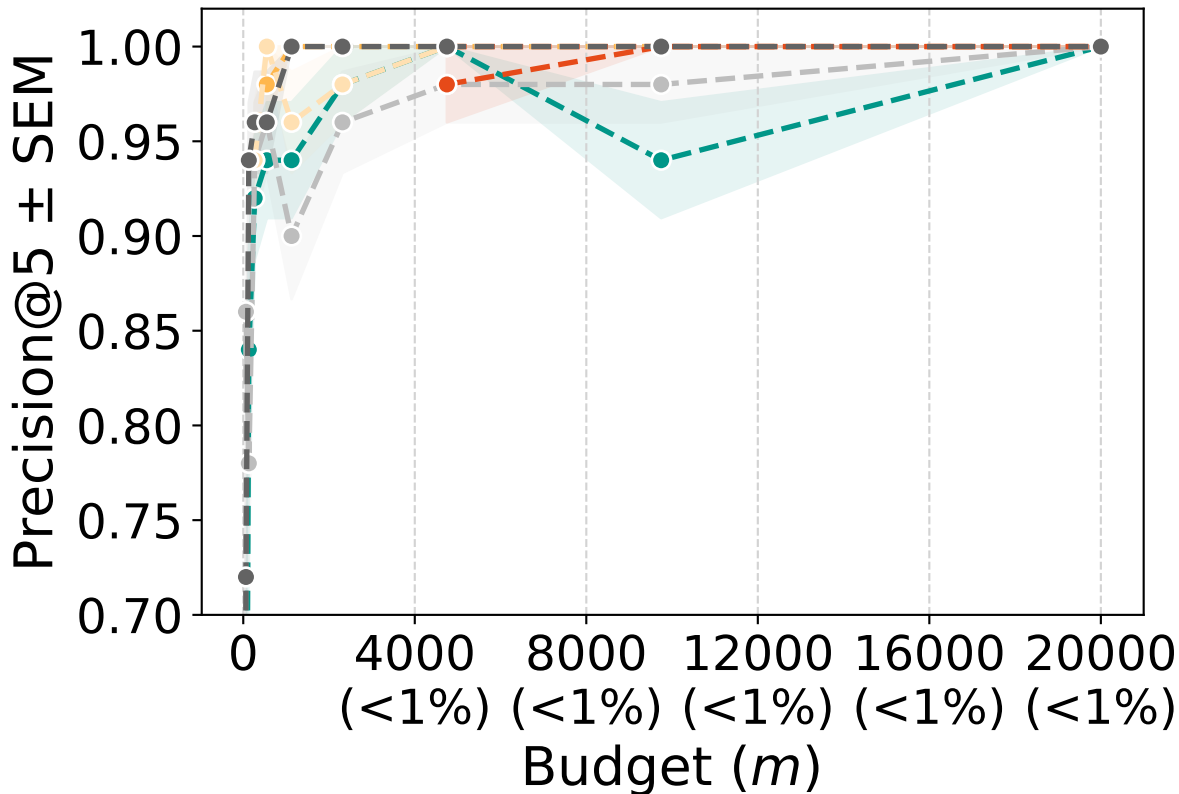

Supplement: supplementary_material [file breast_cancer_random_forest_Precision@5_standard.pdf › shapiq/experiments/plots/pathdependent/breast_cancer_random_forest_Precision@5_standard.pdf]

# Cancer ( $d = 30$ )

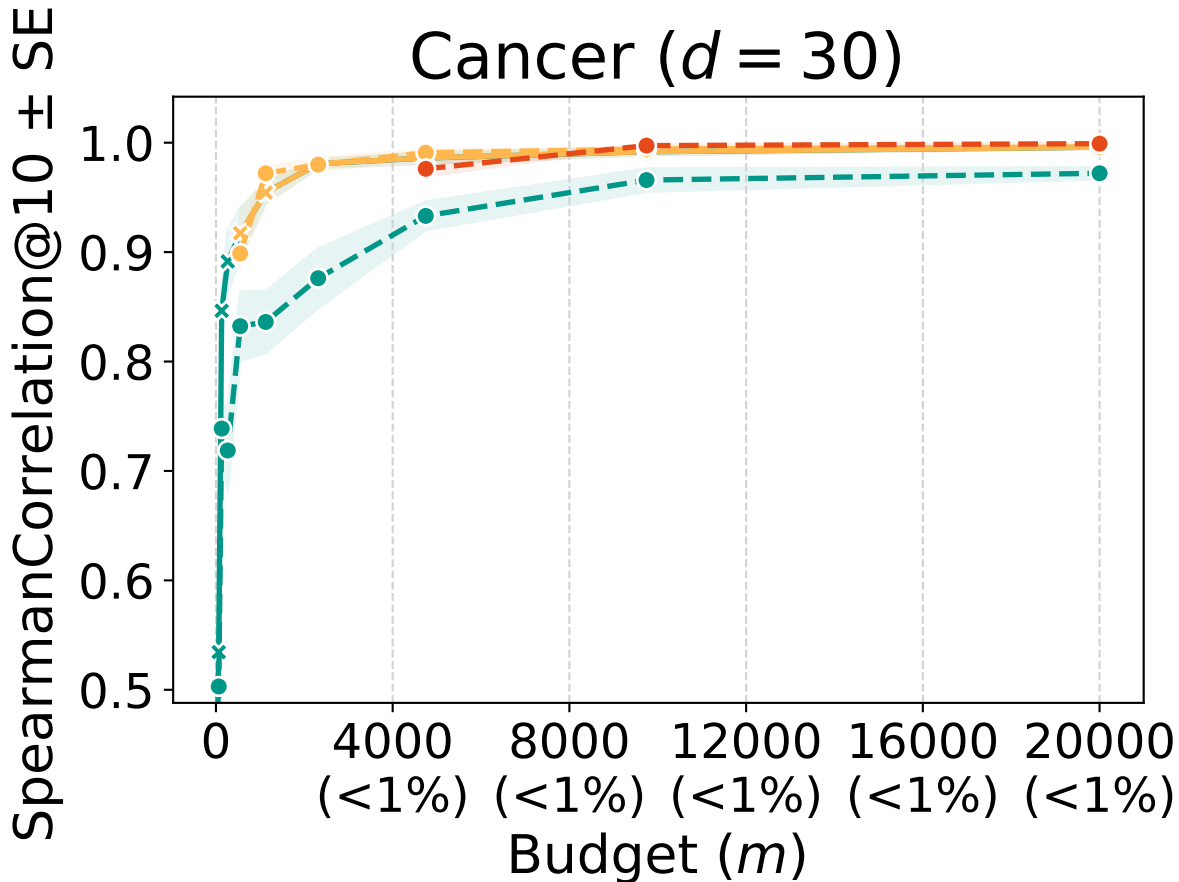

Supplement: supplementary_material [file breast_cancer_random_forest_SpearmanCorrelation@10_paired_vs_standard.pdf › shapiq/experiments/plots/pathdependent/breast_cancer_random_forest_SpearmanCorrelation@10_paired_vs_standard.pdf]

# Cancer ( $d = 30$ )

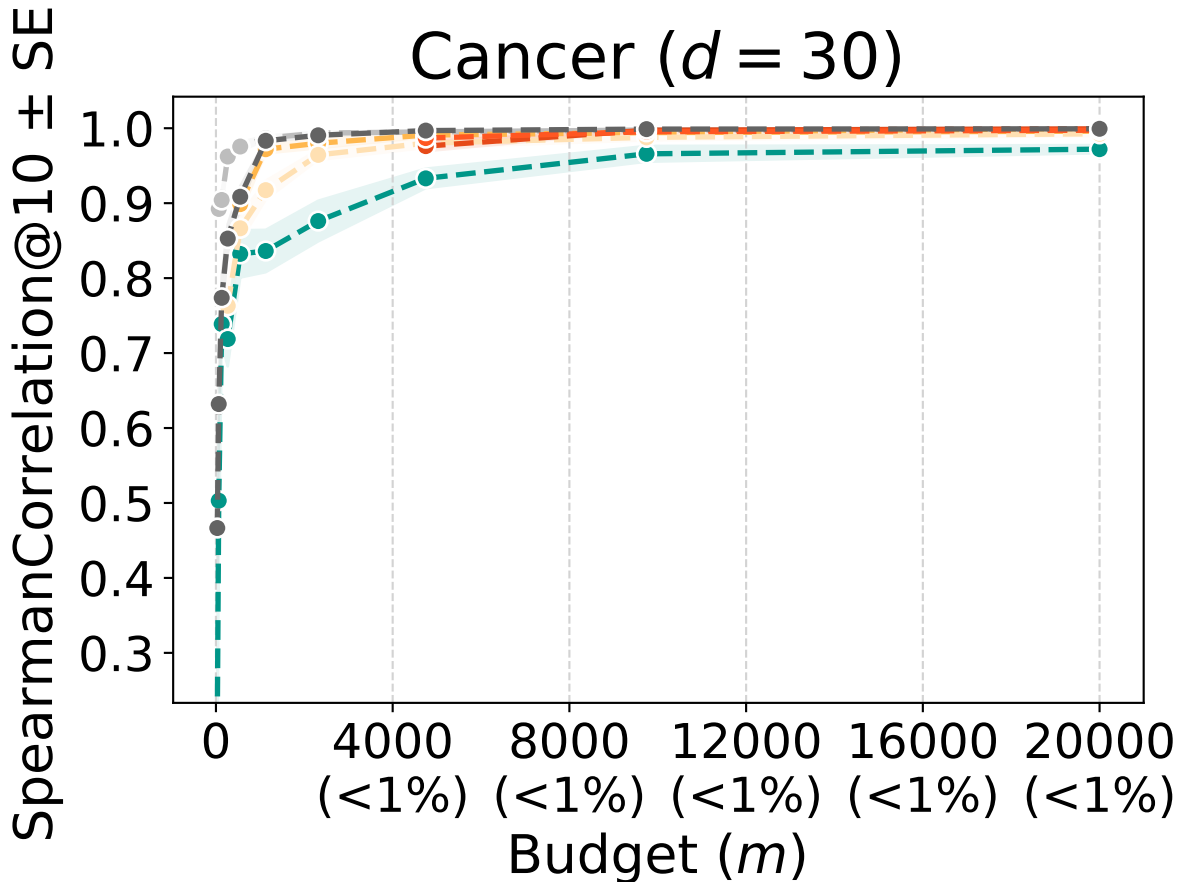

Supplement: supplementary_material [file breast_cancer_random_forest_SpearmanCorrelation@10_standard.pdf › shapiq/experiments/plots/pathdependent/breast_cancer_random_forest_SpearmanCorrelation@10_standard.pdf]

# Cancer ( $d = 30$ )

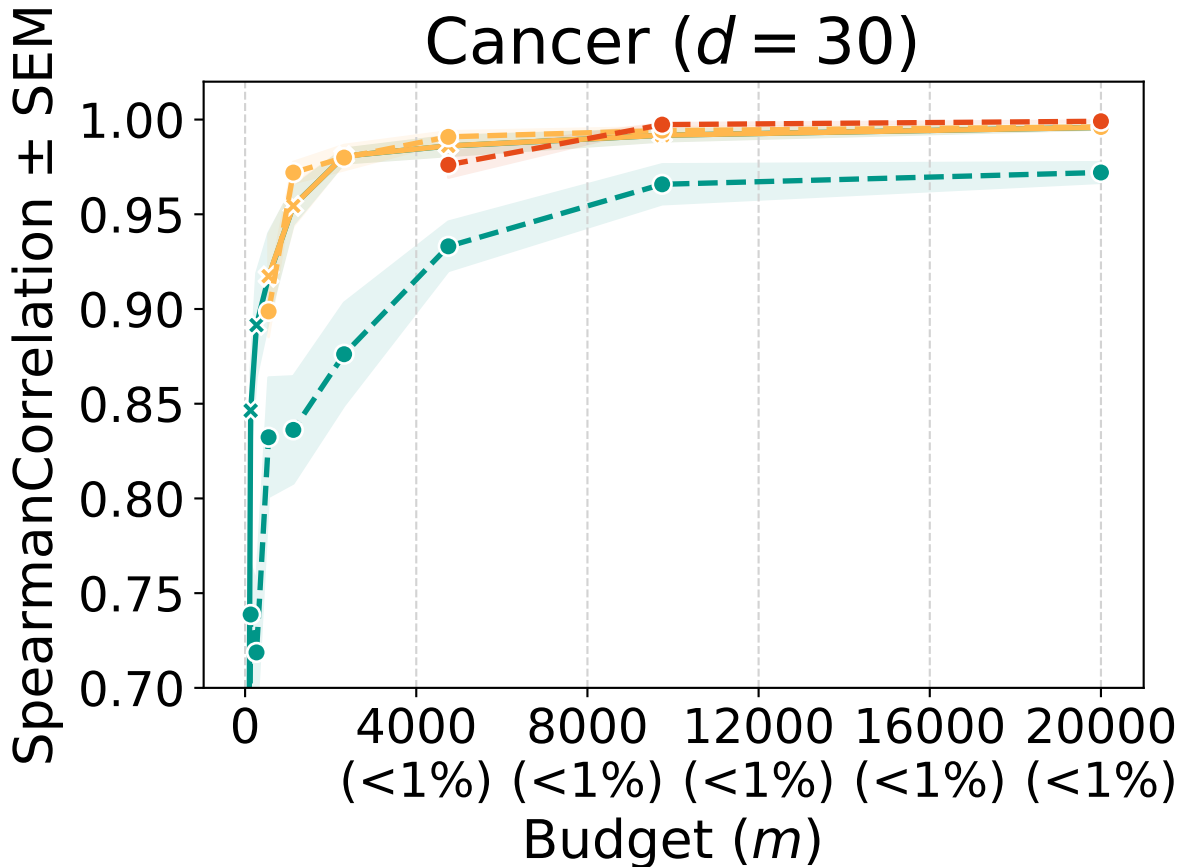

Supplement: supplementary_material [file breast_cancer_random_forest_SpearmanCorrelation_paired_vs_standard.pdf › shapiq/experiments/plots/pathdependent/breast_cancer_random_forest_SpearmanCorrelation_paired_vs_standard.pdf]

# Cancer ( $d = 30$ )

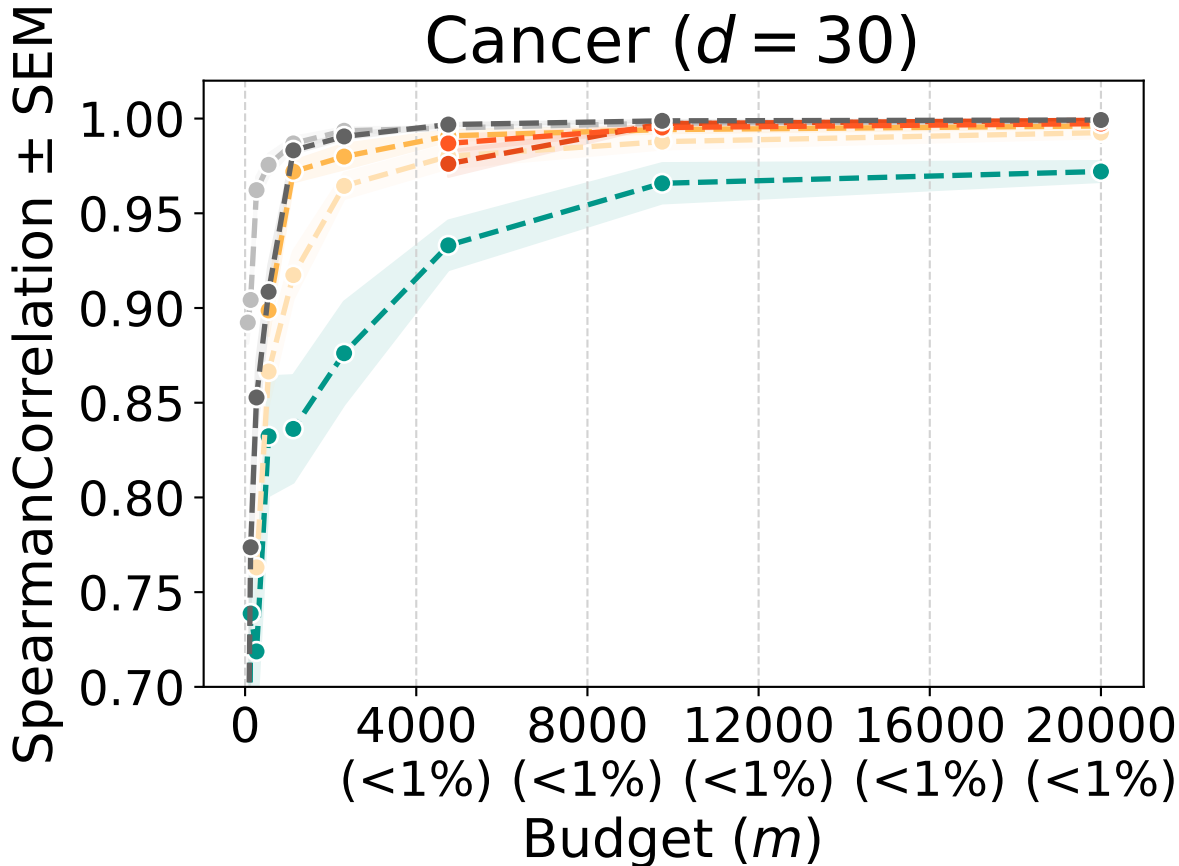

Supplement: supplementary_material [file breast_cancer_random_forest_SpearmanCorrelation_standard.pdf › shapiq/experiments/plots/pathdependent/breast_cancer_random_forest_SpearmanCorrelation_standard.pdf]

# Housing ( $d = 8$ )

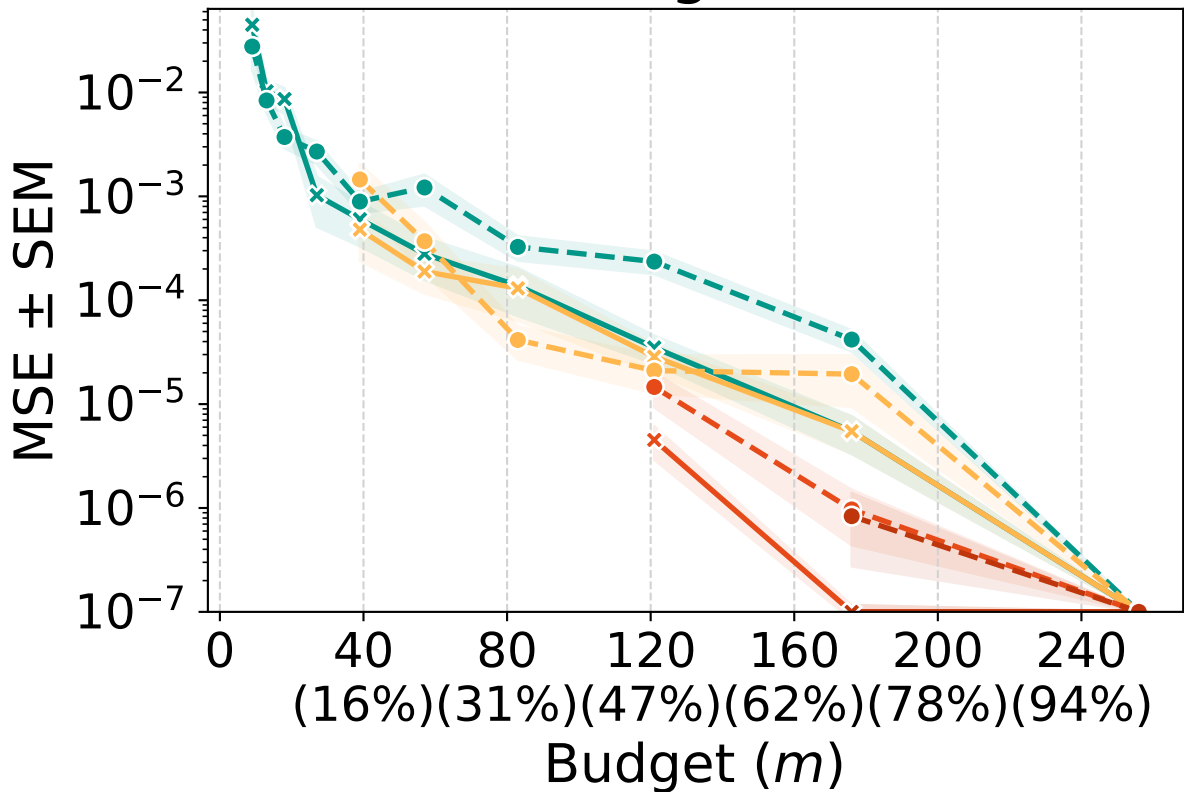

Supplement: supplementary_material [file california_housing_random_forest_MSE_paired_vs_standard.pdf › shapiq/experiments/plots/pathdependent/california_housing_random_forest_MSE_paired_vs_standard.pdf]

# Housing ( $d = 8$ )

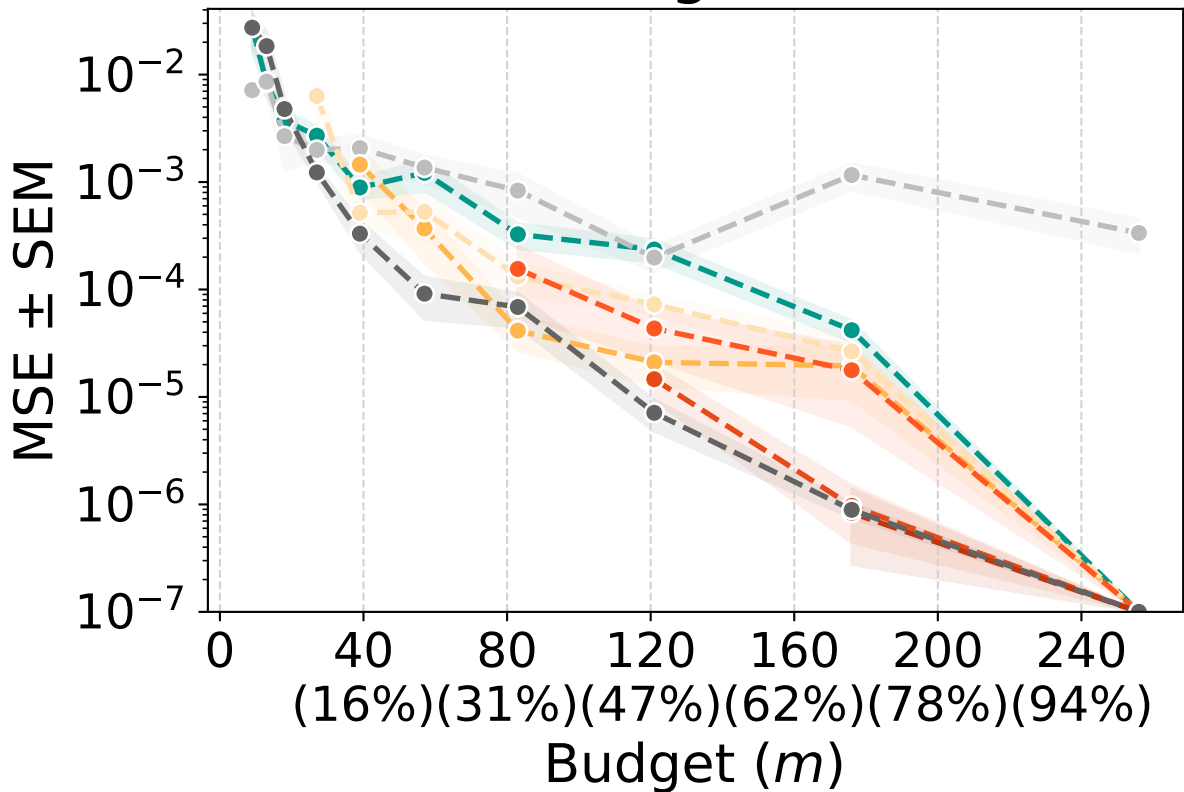

Supplement: supplementary_material [file california_housing_random_forest_MSE_standard.pdf › shapiq/experiments/plots/pathdependent/california_housing_random_forest_MSE_standard.pdf]

# Housing ( $d = 8$ )

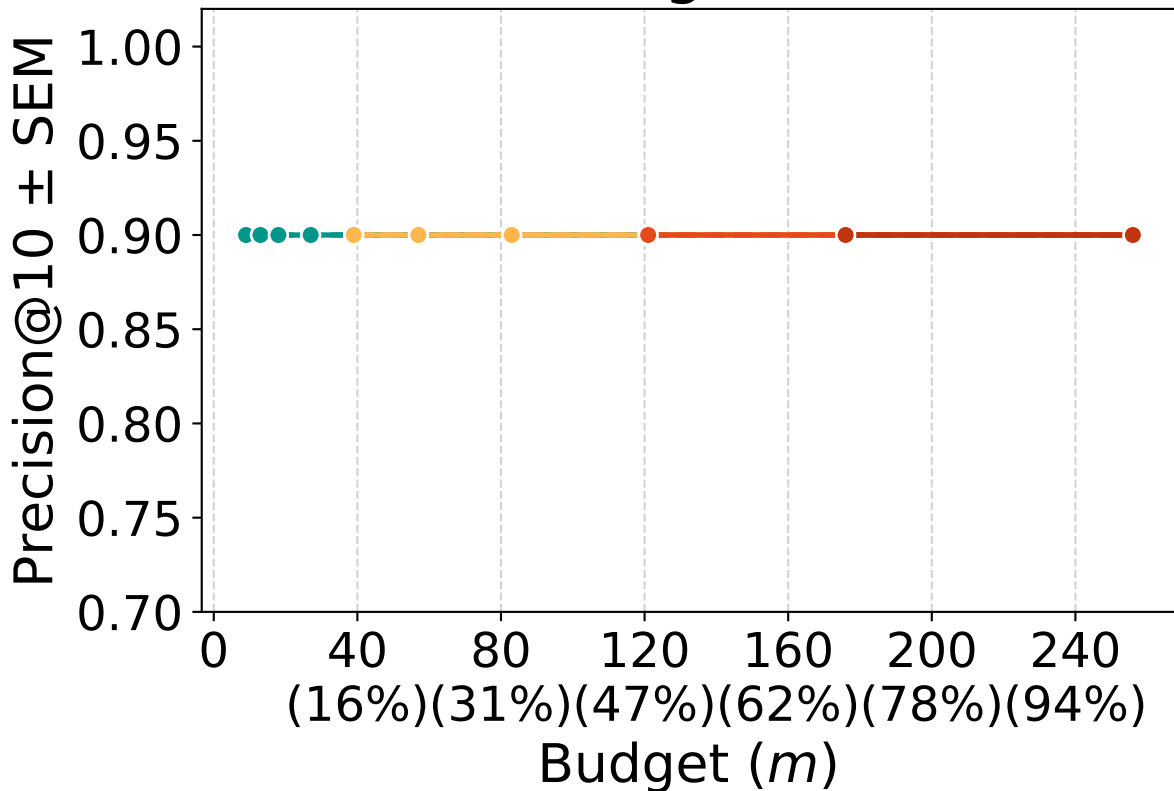

Supplement: supplementary_material [file california_housing_random_forest_Precision@10_paired_vs_standard.pdf › shapiq/experiments/plots/pathdependent/california_housing_random_forest_Precision@10_paired_vs_standard.pdf]

# Housing ( $d = 8$ )

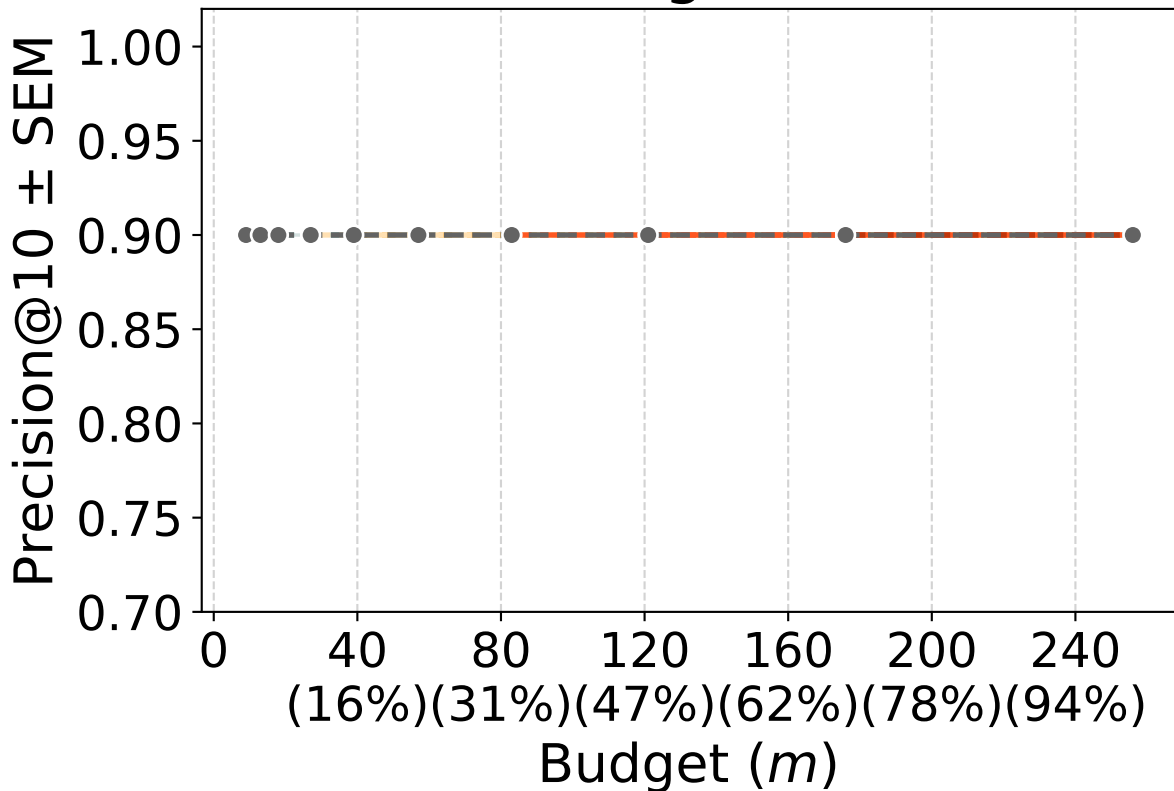

Supplement: supplementary_material [file california_housing_random_forest_Precision@10_standard.pdf › shapiq/experiments/plots/pathdependent/california_housing_random_forest_Precision@10_standard.pdf]

# Housing ( $d = 8$ )

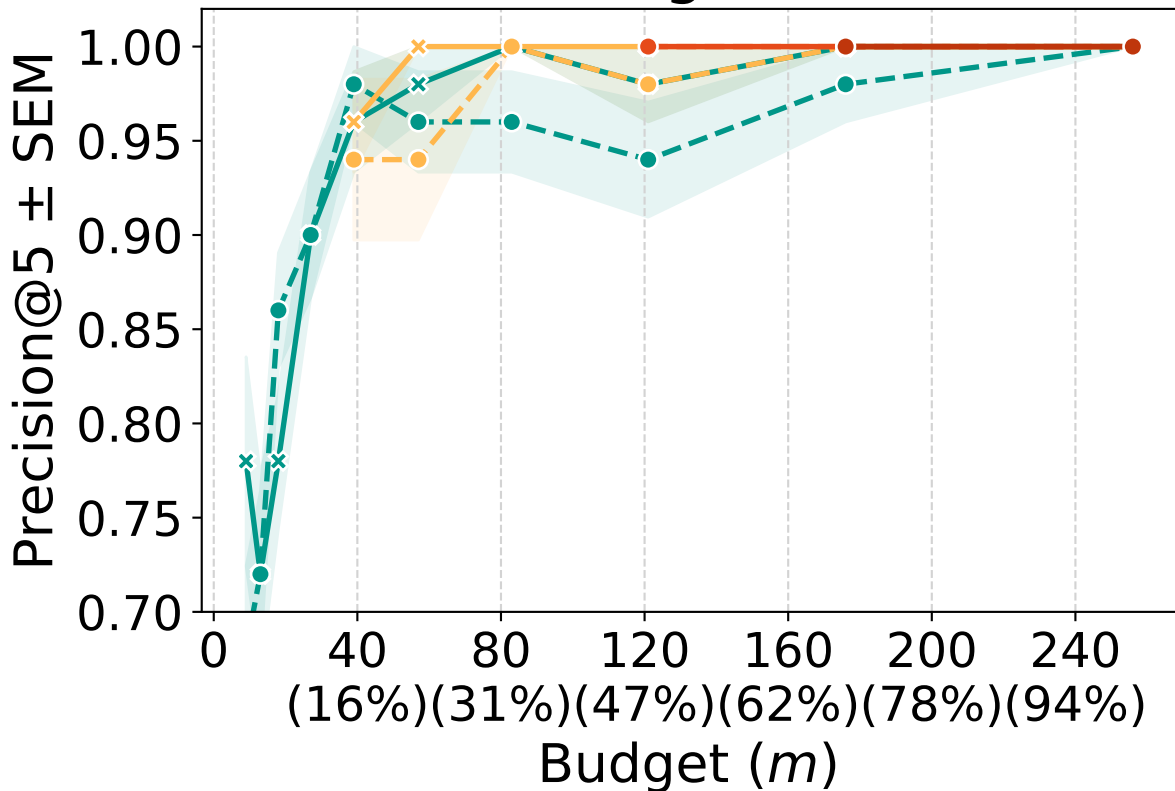

Supplement: supplementary_material [file california_housing_random_forest_Precision@5_paired_vs_standard.pdf › shapiq/experiments/plots/pathdependent/california_housing_random_forest_Precision@5_paired_vs_standard.pdf]

# Housing ( $d = 8$ )

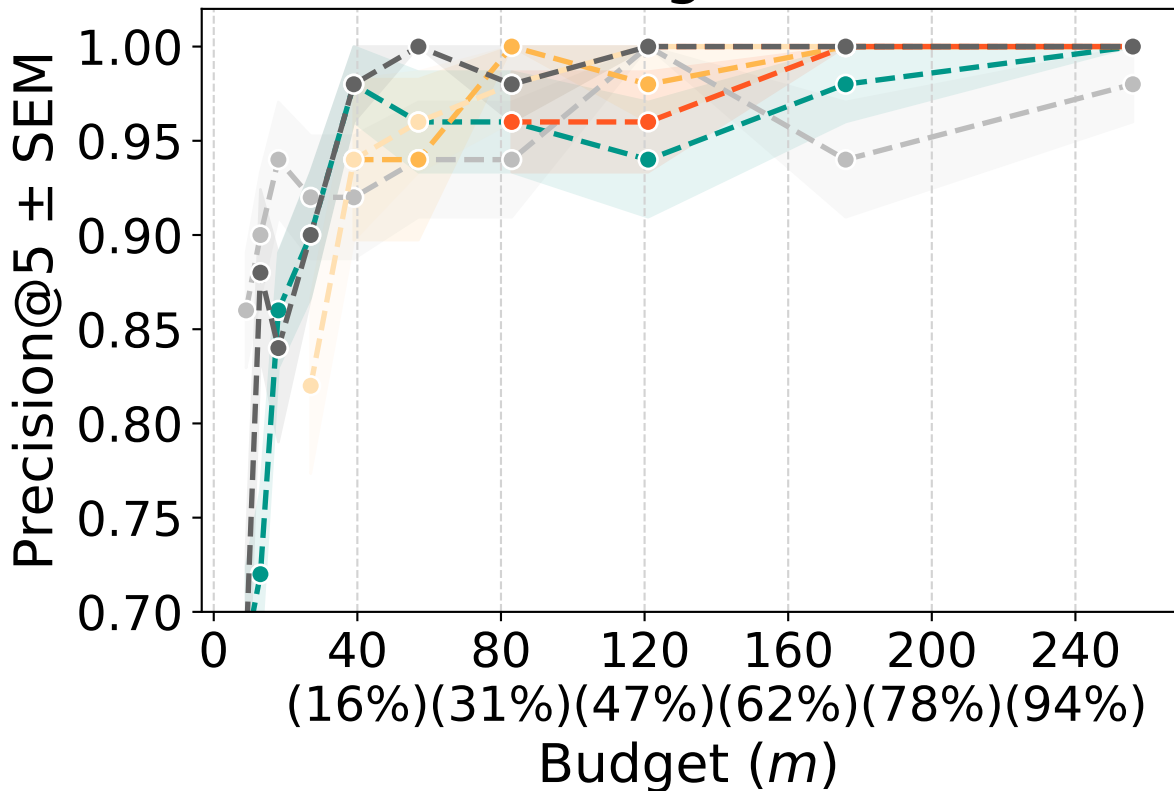

Supplement: supplementary_material [file california_housing_random_forest_Precision@5_standard.pdf › shapiq/experiments/plots/pathdependent/california_housing_random_forest_Precision@5_standard.pdf]

# Housing ( $d = 8$ )

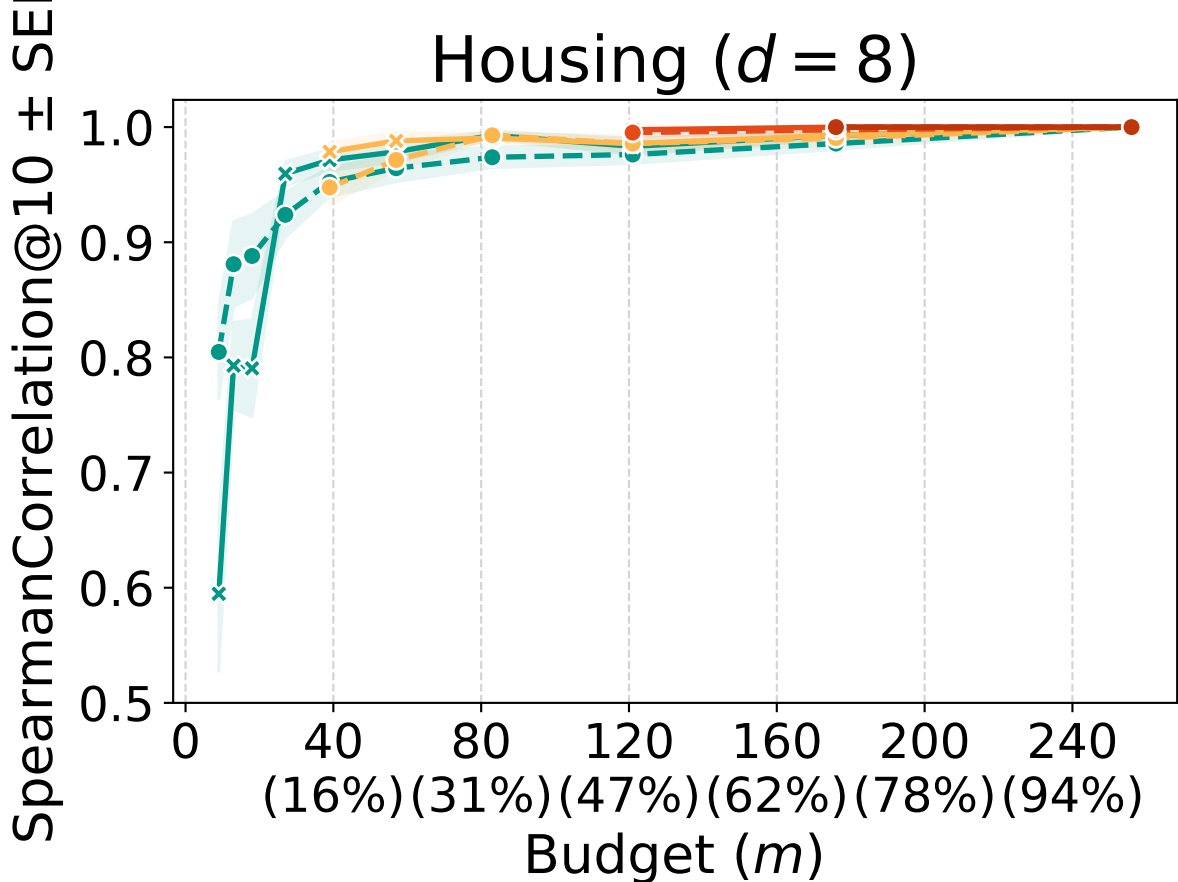

Supplement: supplementary_material [file california_housing_random_forest_SpearmanCorrelation@10_paired_vs_standard.pdf › shapiq/experiments/plots/pathdependent/california_housing_random_forest_SpearmanCorrelation@10_paired_vs_standard.pdf]

# Housing ( $d = 8$ )

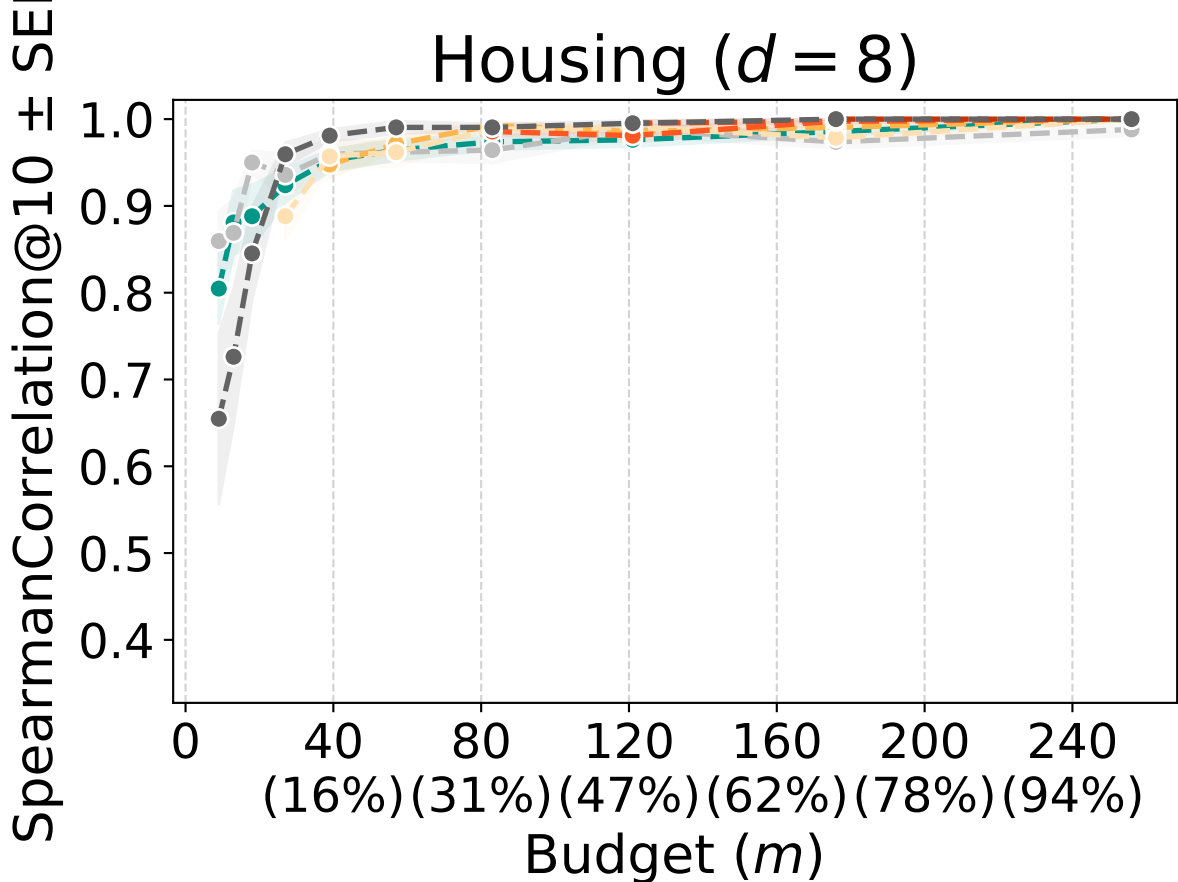

Supplement: supplementary_material [file california_housing_random_forest_SpearmanCorrelation@10_standard.pdf › shapiq/experiments/plots/pathdependent/california_housing_random_forest_SpearmanCorrelation@10_standard.pdf]

# Housing ( $d = 8$ )

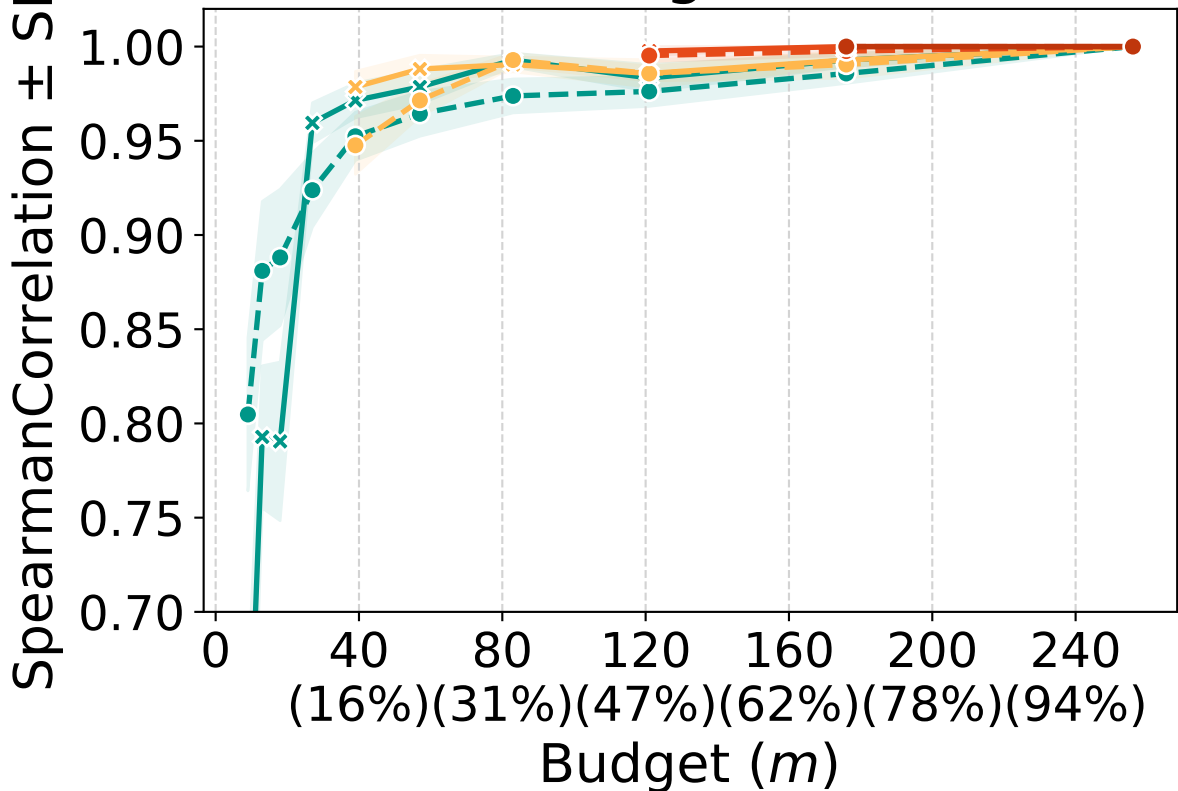

Supplement: supplementary_material [file california_housing_random_forest_SpearmanCorrelation_paired_vs_standard.pdf › shapiq/experiments/plots/pathdependent/california_housing_random_forest_SpearmanCorrelation_paired_vs_standard.pdf]

# Housing ( $d = 8$ )

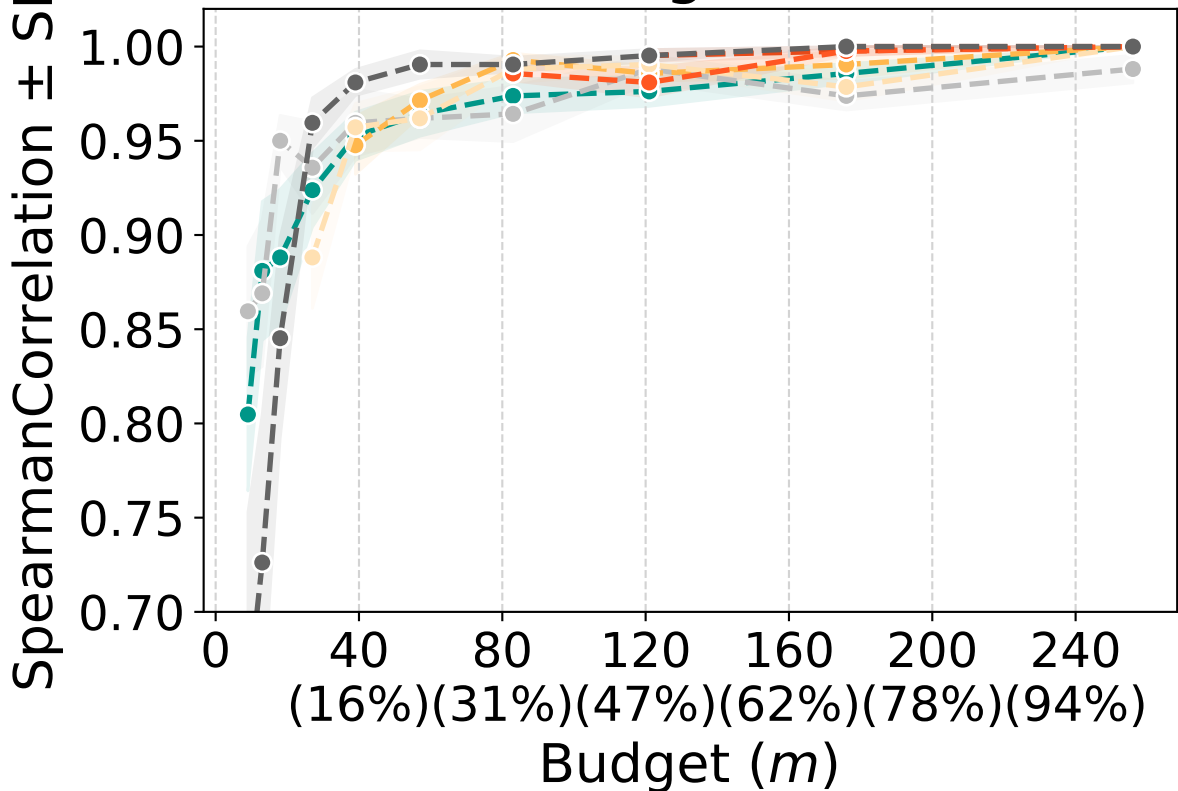

Supplement: supplementary_material [file california_housing_random_forest_SpearmanCorrelation_standard.pdf › shapiq/experiments/plots/pathdependent/california_housing_random_forest_SpearmanCorrelation_standard.pdf]

# Crime ( $d = 101$ )

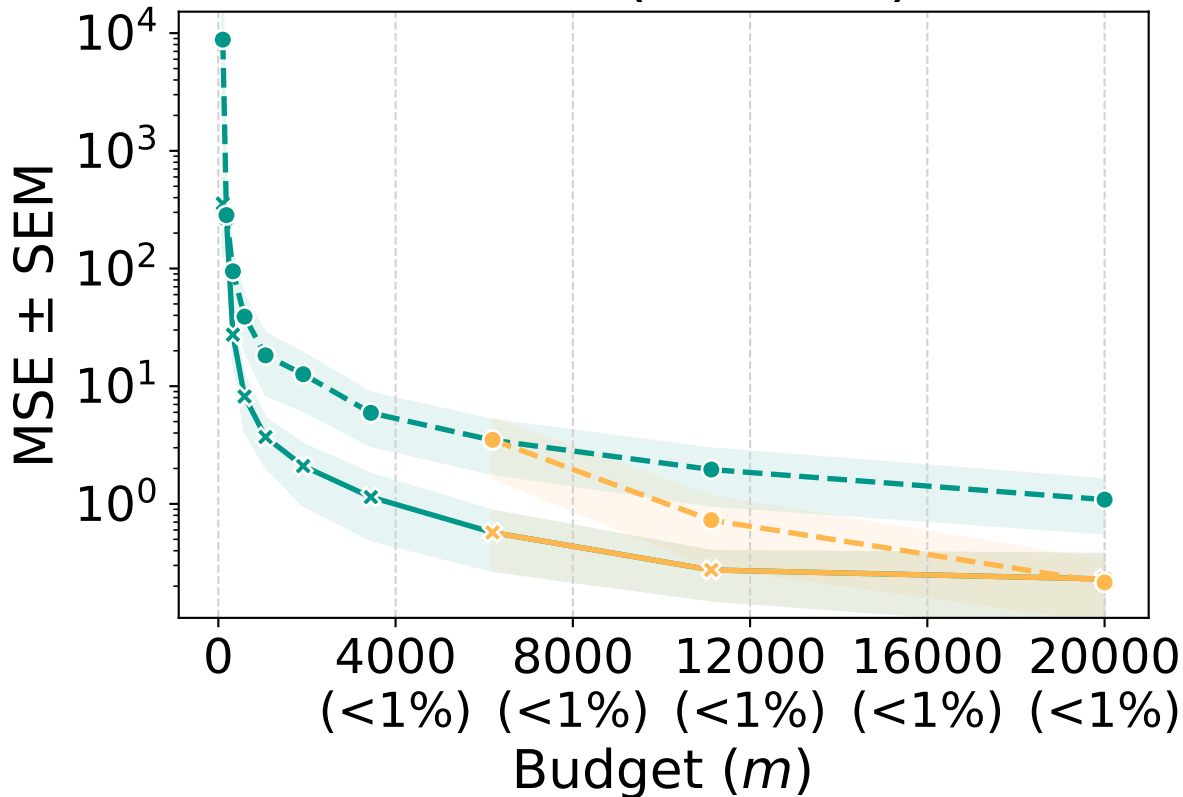

Supplement: supplementary_material [file communities_and_crime_random_forest_MSE_paired_vs_standard.pdf › shapiq/experiments/plots/pathdependent/communities_and_crime_random_forest_MSE_paired_vs_standard.pdf]

# Crime ( $d = 101$ )

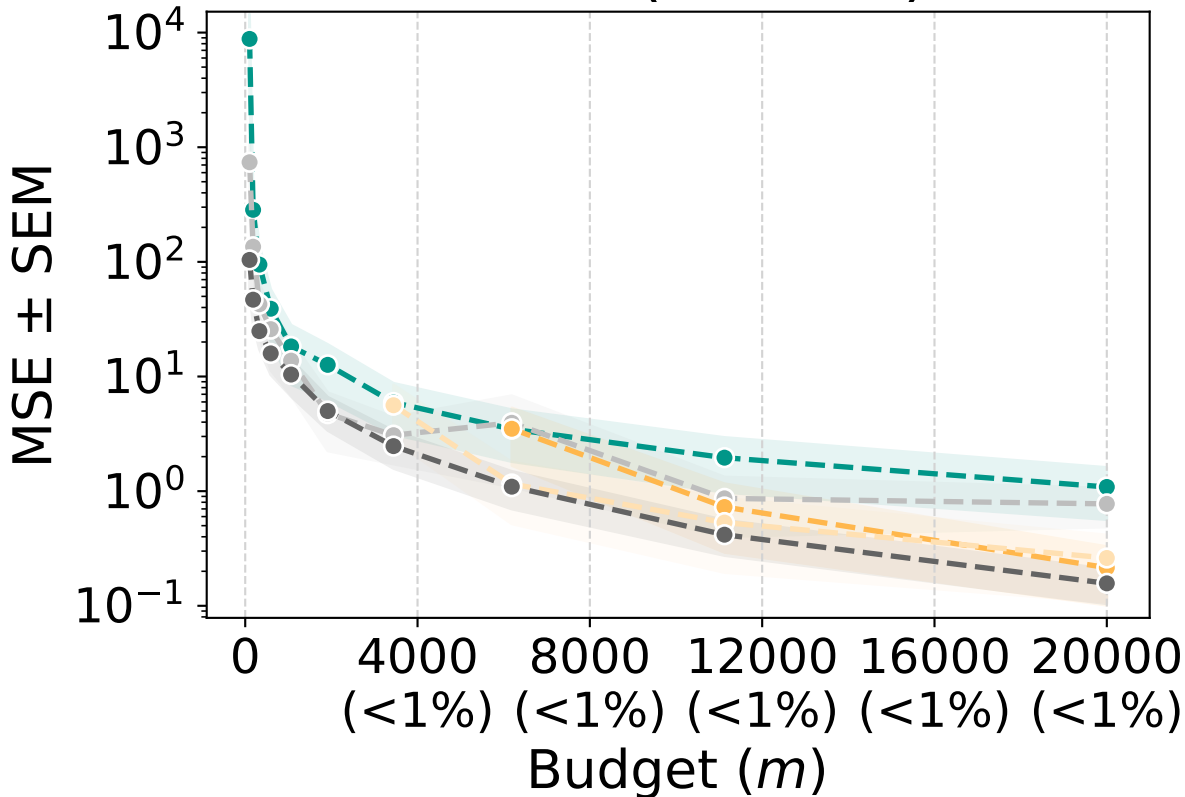

Supplement: supplementary_material [file communities_and_crime_random_forest_MSE_standard.pdf › shapiq/experiments/plots/pathdependent/communities_and_crime_random_forest_MSE_standard.pdf]

# Crime ( $d = 101$ )

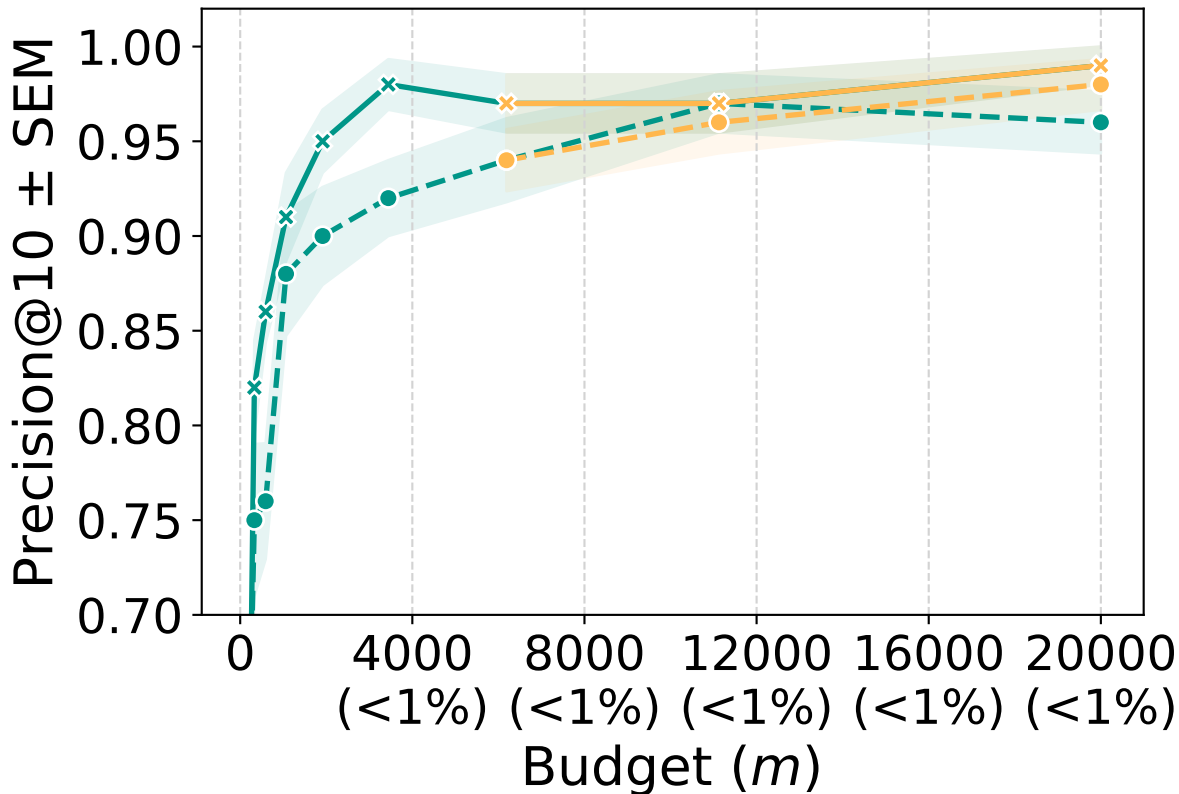

Supplement: supplementary_material [file communities_and_crime_random_forest_Precision@10_paired_vs_standard.pdf › shapiq/experiments/plots/pathdependent/communities_and_crime_random_forest_Precision@10_paired_vs_standard.pdf]

# Crime ( $d = 101$ )

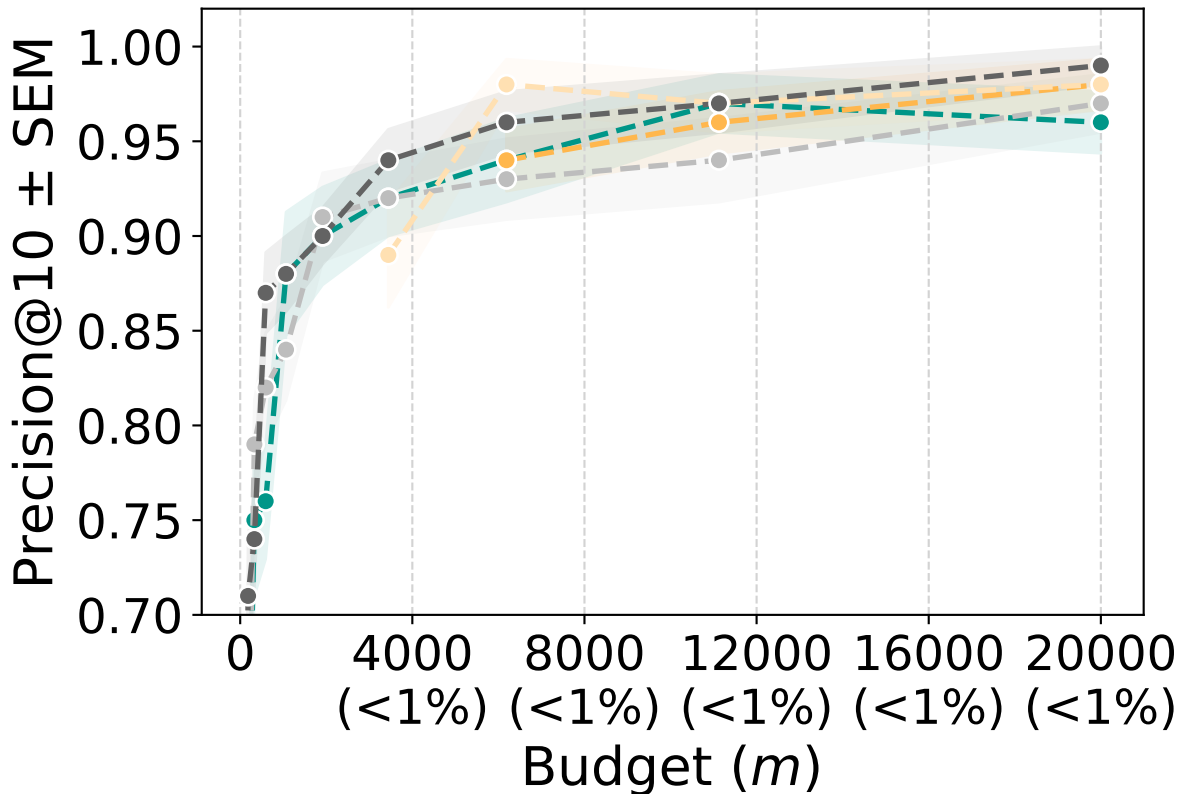

Supplement: supplementary_material [file communities_and_crime_random_forest_Precision@10_standard.pdf › shapiq/experiments/plots/pathdependent/communities_and_crime_random_forest_Precision@10_standard.pdf]

# Crime ( $d = 101$ )

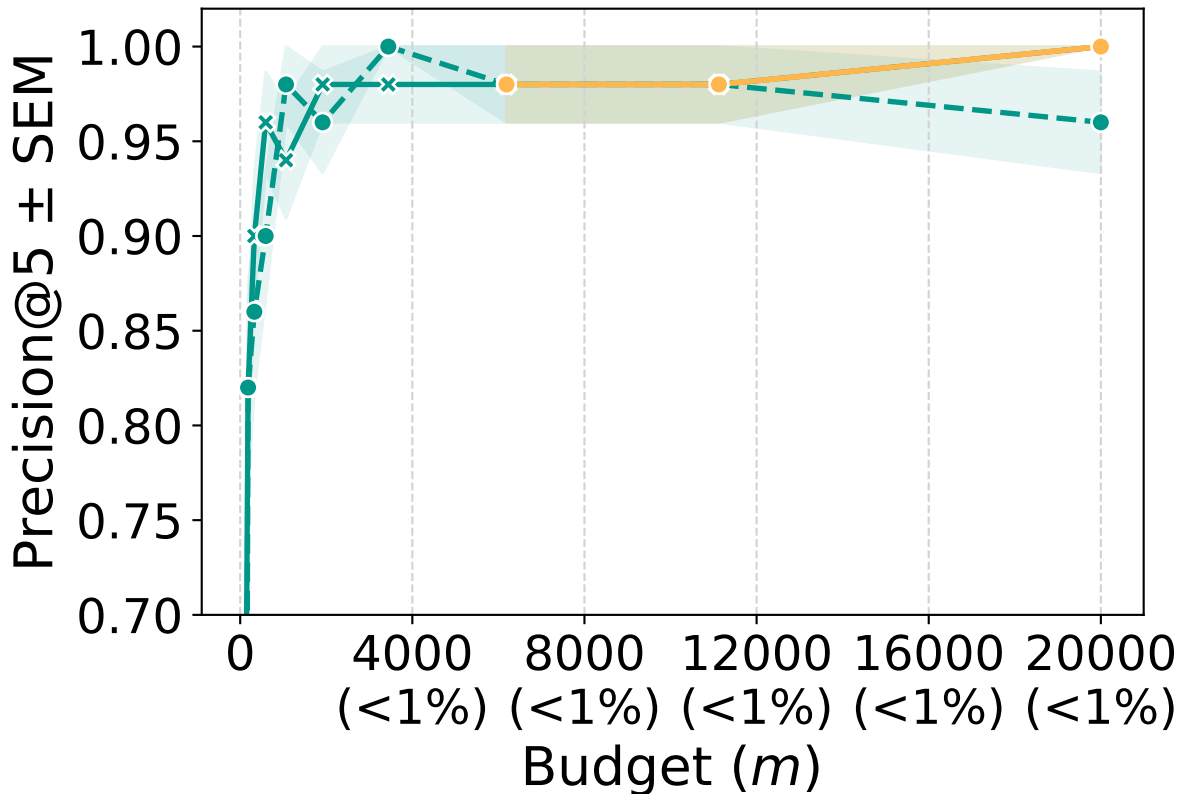

Supplement: supplementary_material [file communities_and_crime_random_forest_Precision@5_paired_vs_standard.pdf › shapiq/experiments/plots/pathdependent/communities_and_crime_random_forest_Precision@5_paired_vs_standard.pdf]

# Crime ( $d = 101$ )

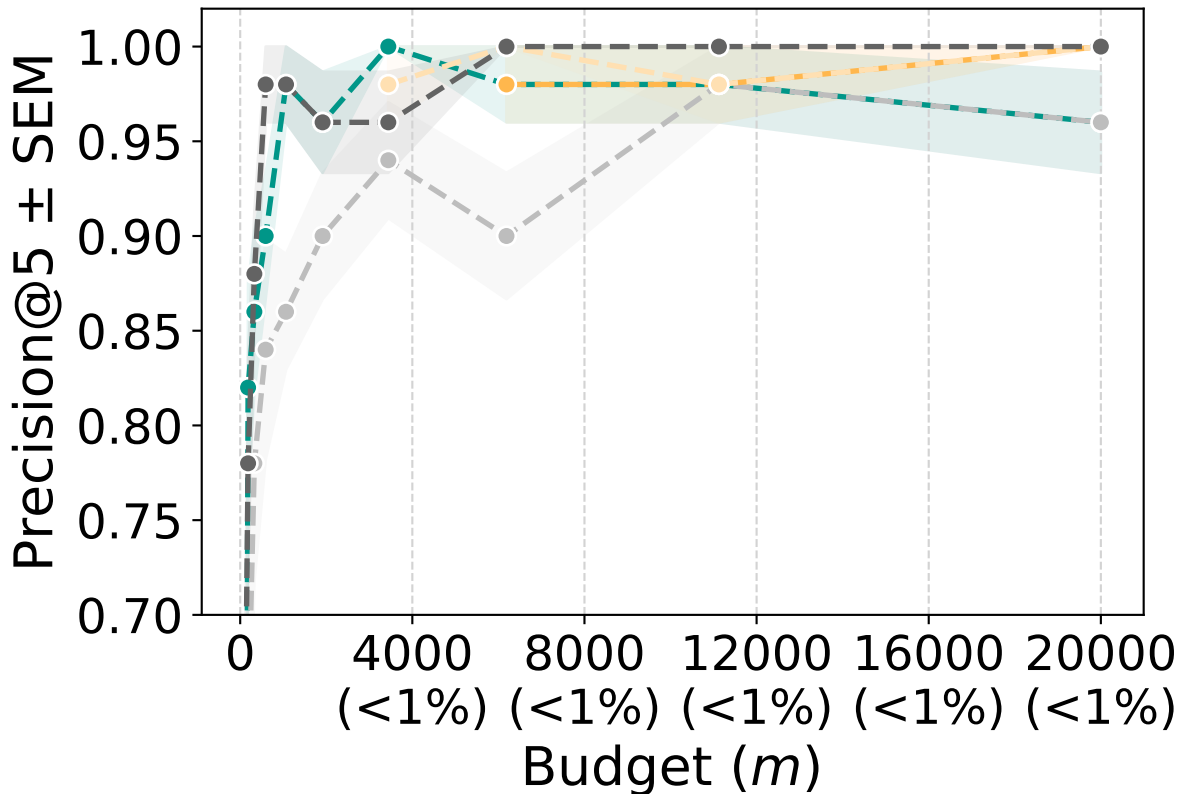

Supplement: supplementary_material [file communities_and_crime_random_forest_Precision@5_standard.pdf › shapiq/experiments/plots/pathdependent/communities_and_crime_random_forest_Precision@5_standard.pdf]

# Crime ( $d = 101$ )

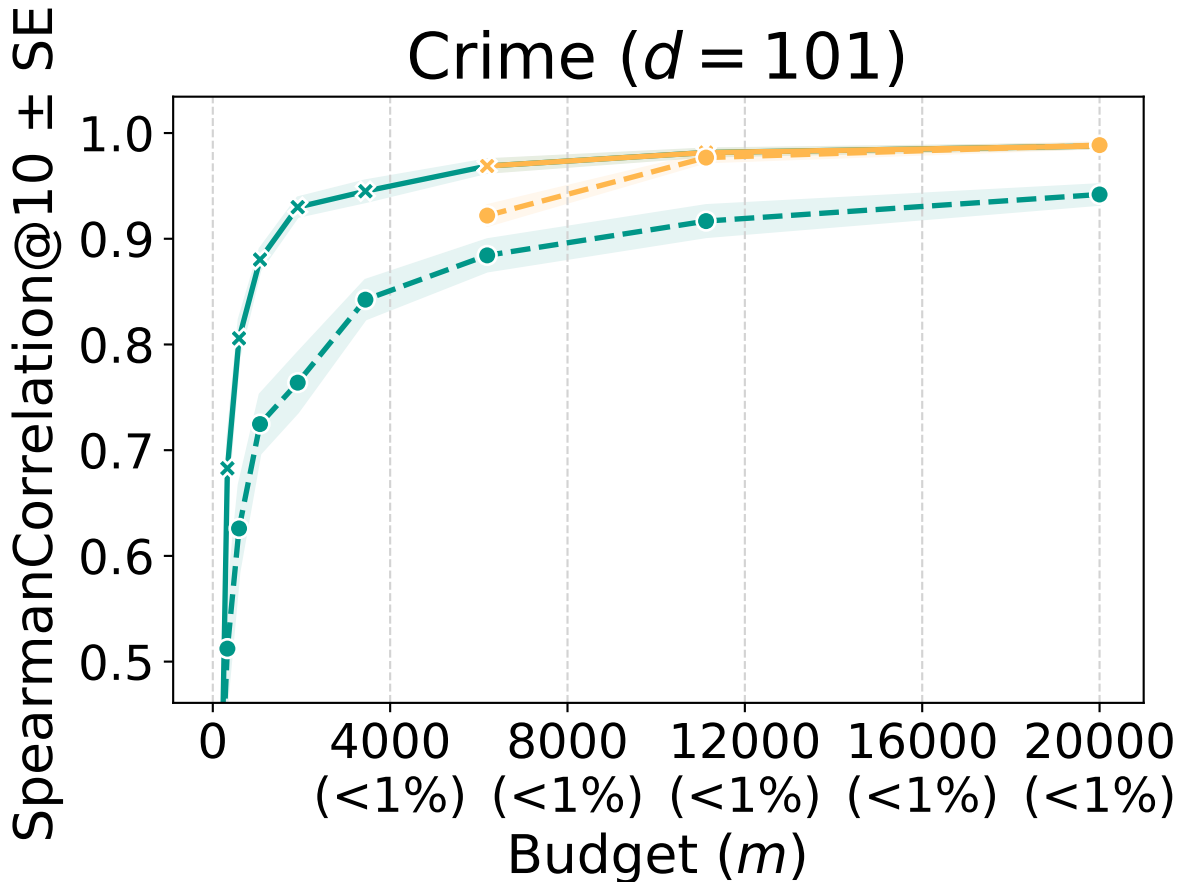

Supplement: supplementary_material [file communities_and_crime_random_forest_SpearmanCorrelation@10_paired_vs_standard.pdf › shapiq/experiments/plots/pathdependent/communities_and_crime_random_forest_SpearmanCorrelation@10_paired_vs_standard.pdf]

# Crime ( $d = 101$ )

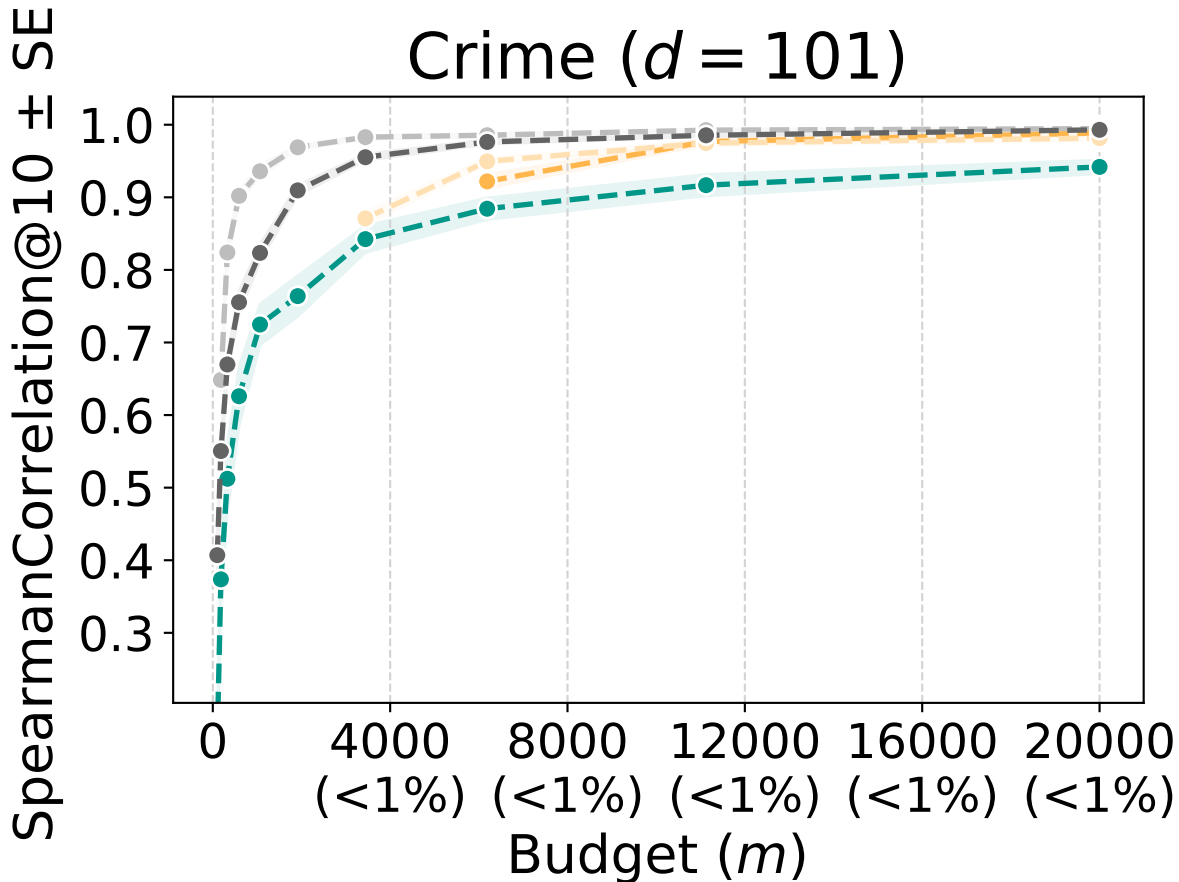

Supplement: supplementary_material [file communities_and_crime_random_forest_SpearmanCorrelation@10_standard.pdf › shapiq/experiments/plots/pathdependent/communities_and_crime_random_forest_SpearmanCorrelation@10_standard.pdf]

# Crime ( $d = 101$ )

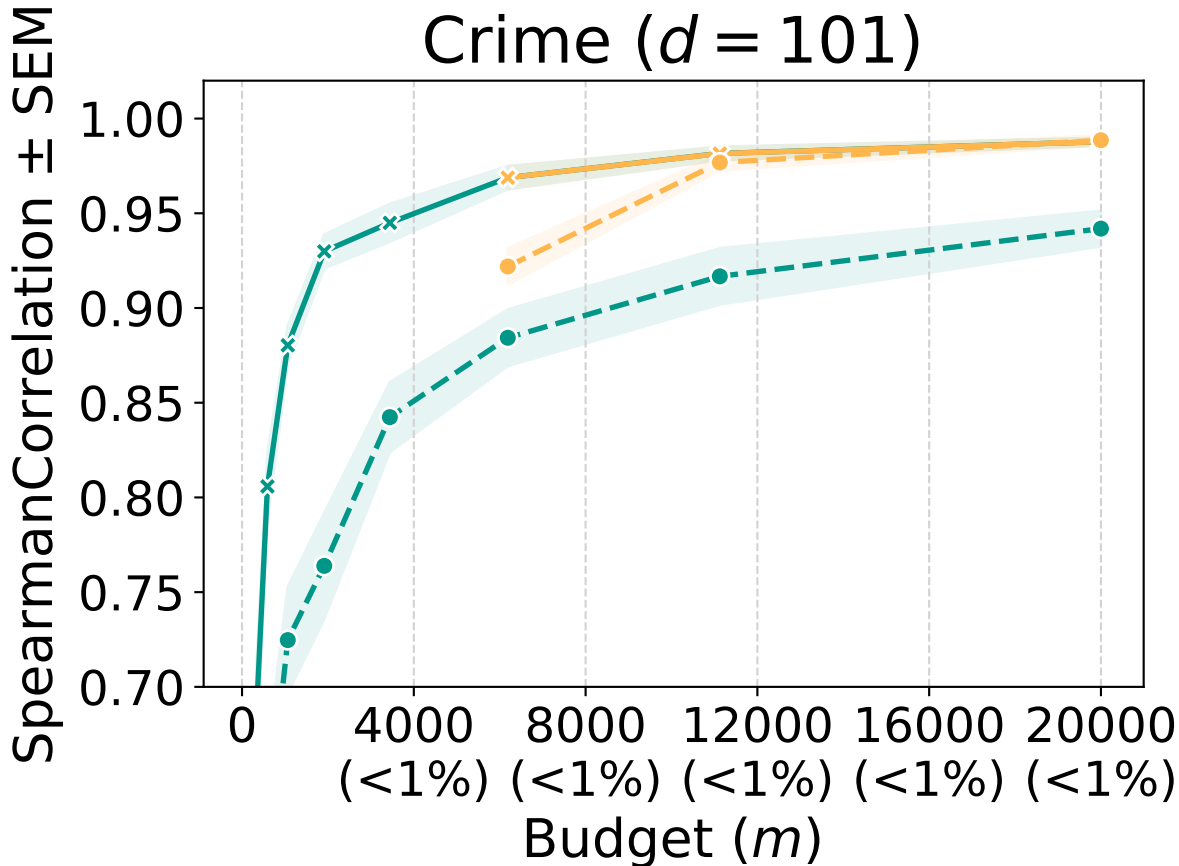

Supplement: supplementary_material [file communities_and_crime_random_forest_SpearmanCorrelation_paired_vs_standard.pdf › shapiq/experiments/plots/pathdependent/communities_and_crime_random_forest_SpearmanCorrelation_paired_vs_standard.pdf]

# Crime ( $d = 101$ )

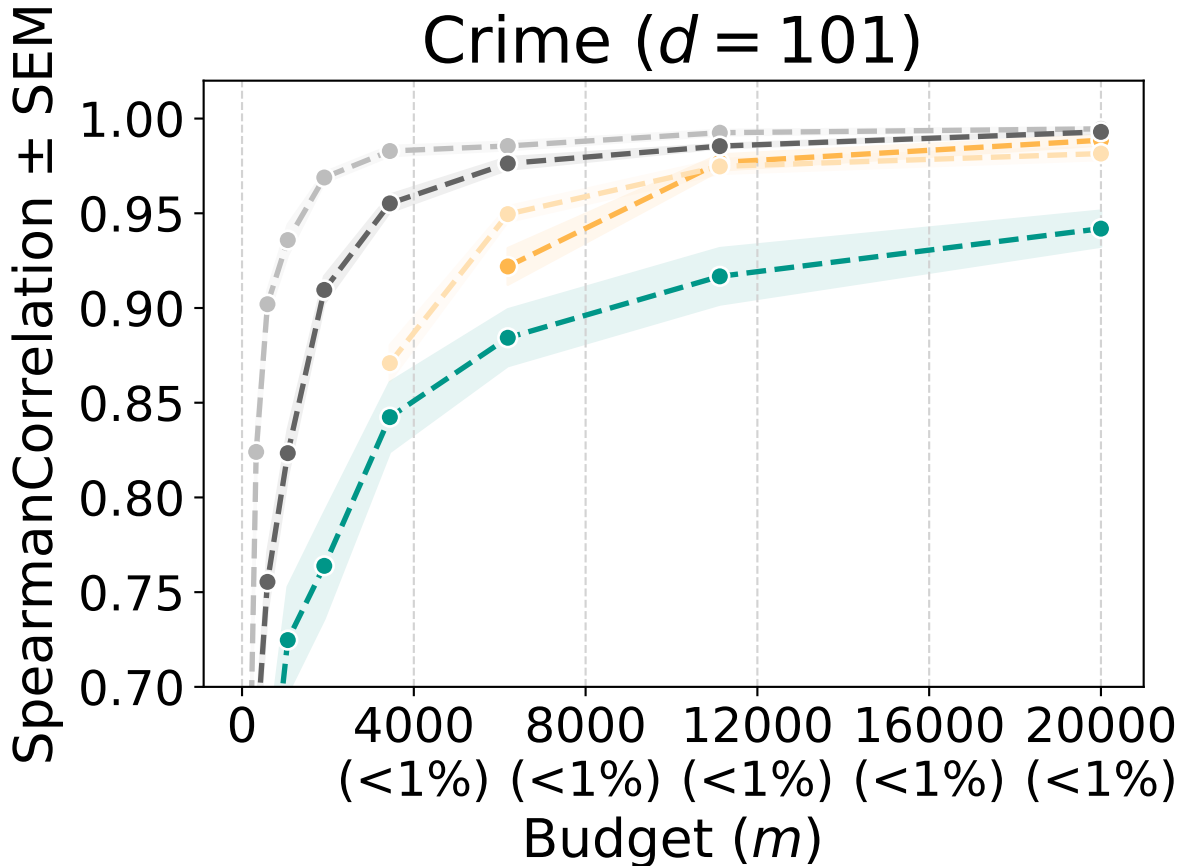

Supplement: supplementary_material [file communities_and_crime_random_forest_SpearmanCorrelation_standard.pdf › shapiq/experiments/plots/pathdependent/communities_and_crime_random_forest_SpearmanCorrelation_standard.pdf]

# CG60 ( $d = 60$ )

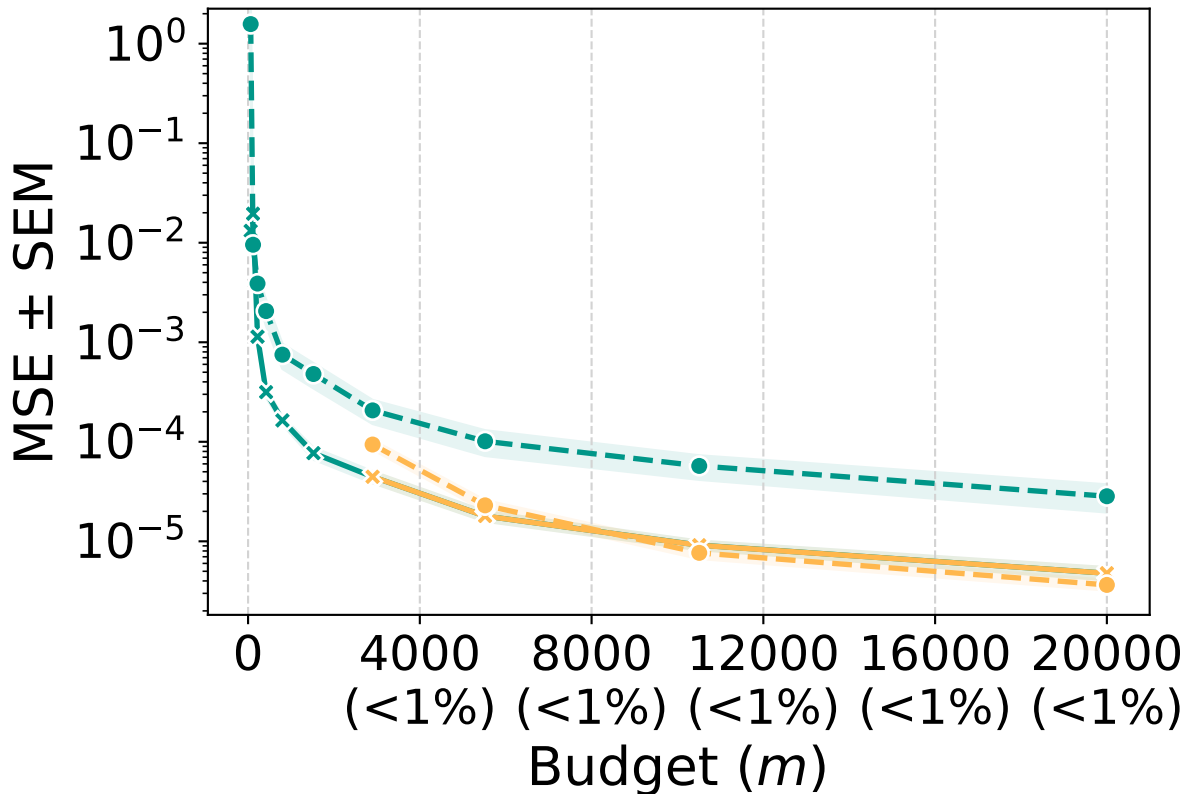

Supplement: supplementary_material [file corrgroups60_random_forest_MSE_paired_vs_standard.pdf › shapiq/experiments/plots/pathdependent/corrgroups60_random_forest_MSE_paired_vs_standard.pdf]

# CG60 ( $d = 60$ )

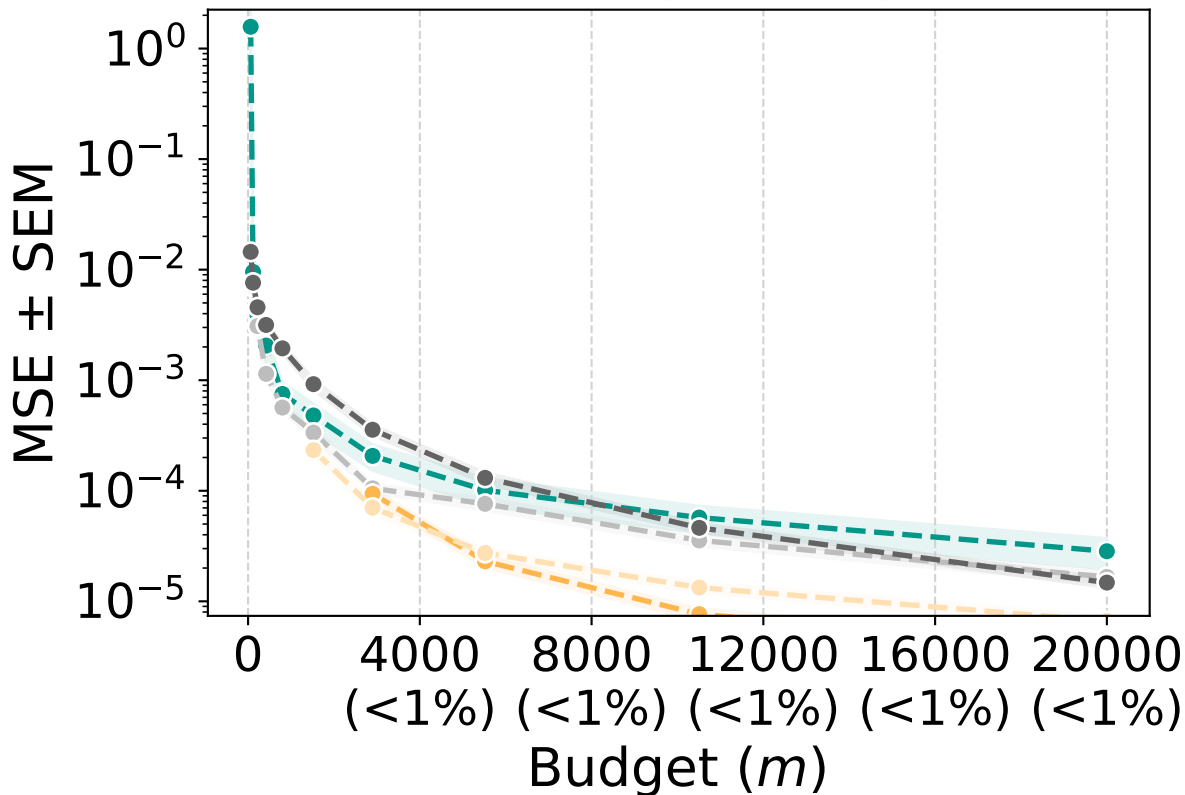

Supplement: supplementary_material [file corrgroups60_random_forest_MSE_standard.pdf › shapiq/experiments/plots/pathdependent/corrgroups60_random_forest_MSE_standard.pdf]

# CG60 ( $d = 60$ )

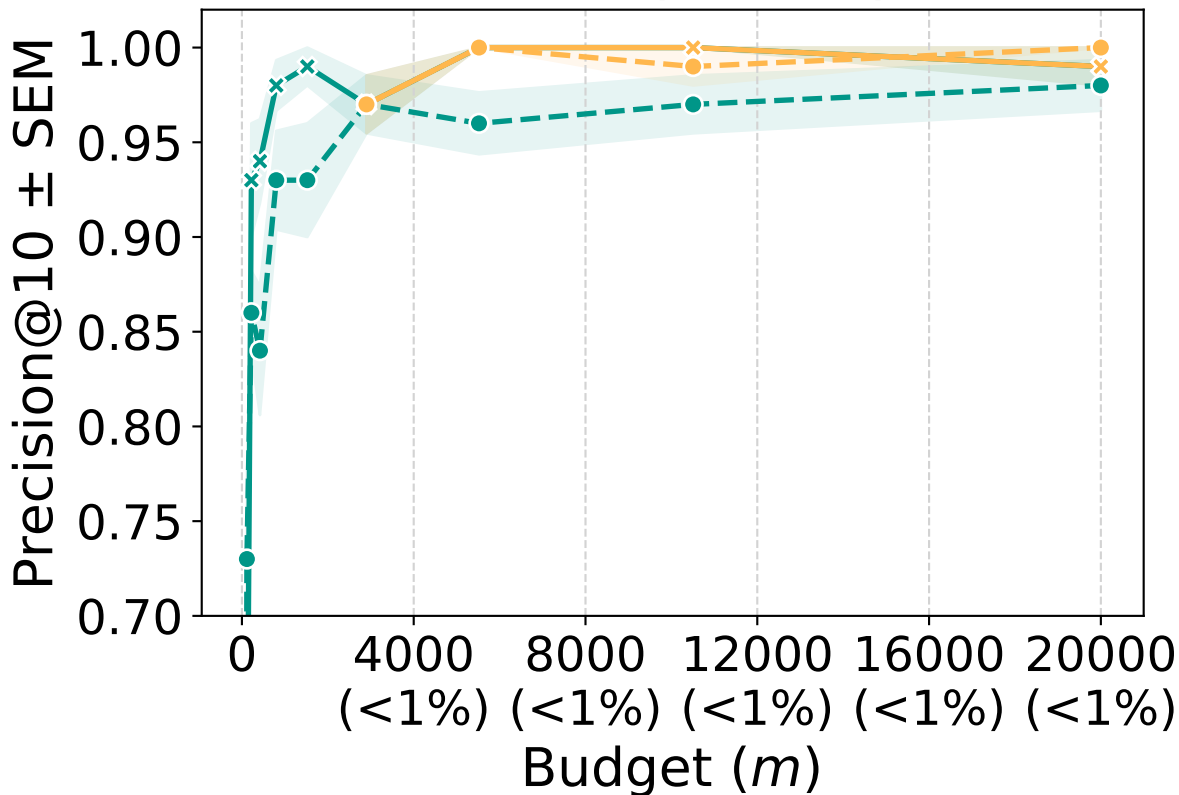

Supplement: supplementary_material [file corrgroups60_random_forest_Precision@10_paired_vs_standard.pdf › shapiq/experiments/plots/pathdependent/corrgroups60_random_forest_Precision@10_paired_vs_standard.pdf]

# CG60 ( $d = 60$ )

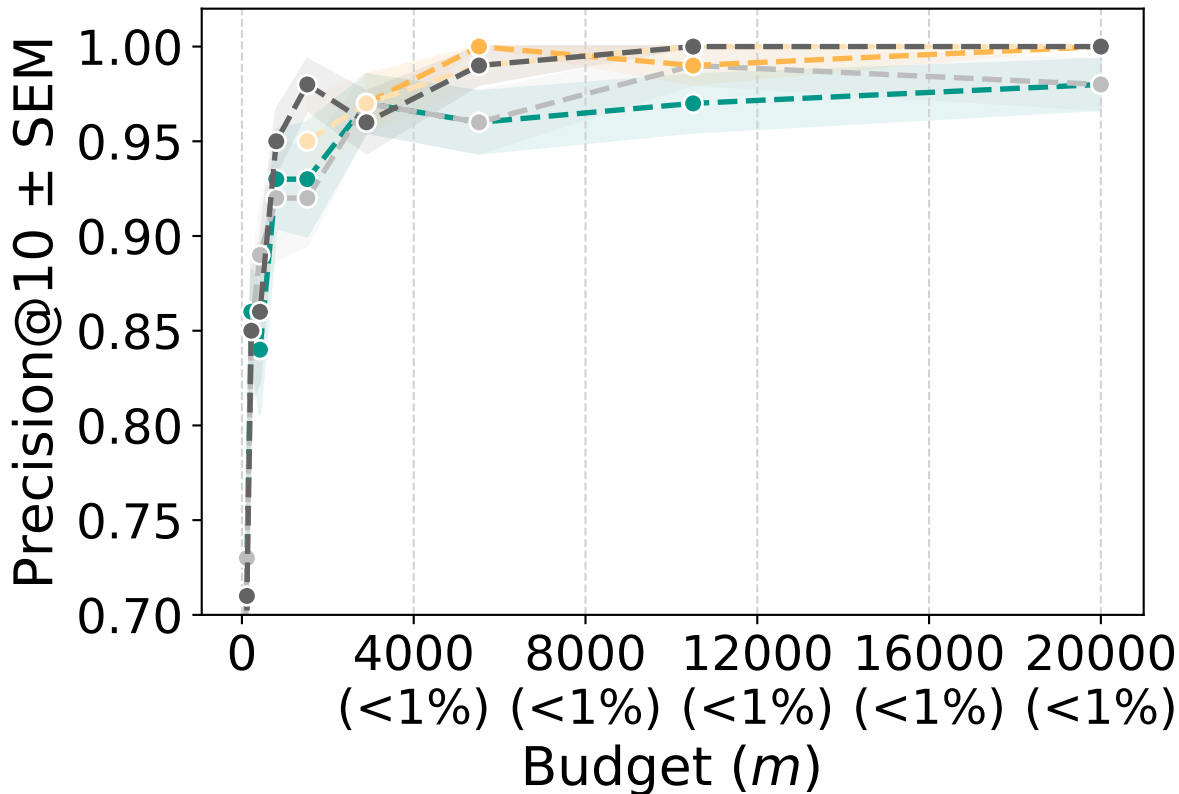

Supplement: supplementary_material [file corrgroups60_random_forest_Precision@10_standard.pdf › shapiq/experiments/plots/pathdependent/corrgroups60_random_forest_Precision@10_standard.pdf]

# CG60 ( $d = 60$ )

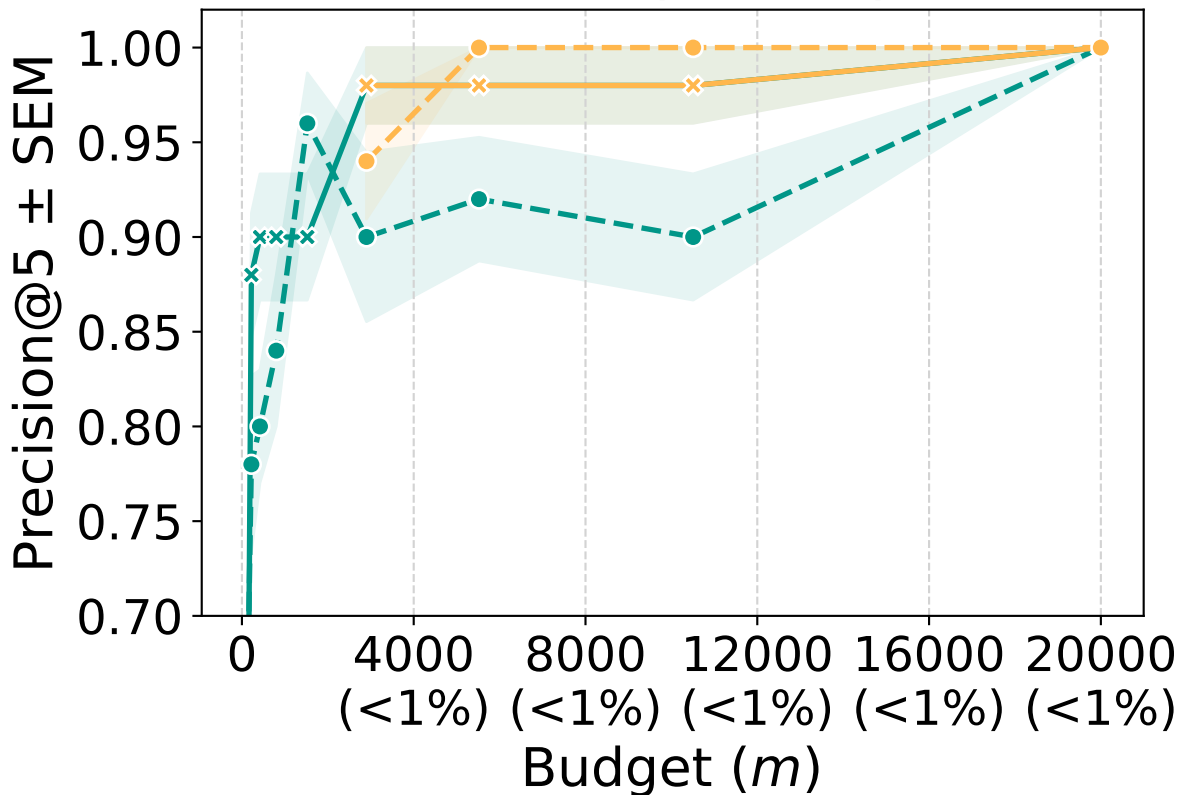

Supplement: supplementary_material [file corrgroups60_random_forest_Precision@5_paired_vs_standard.pdf › shapiq/experiments/plots/pathdependent/corrgroups60_random_forest_Precision@5_paired_vs_standard.pdf]

# CG60 ( $d = 60$ )

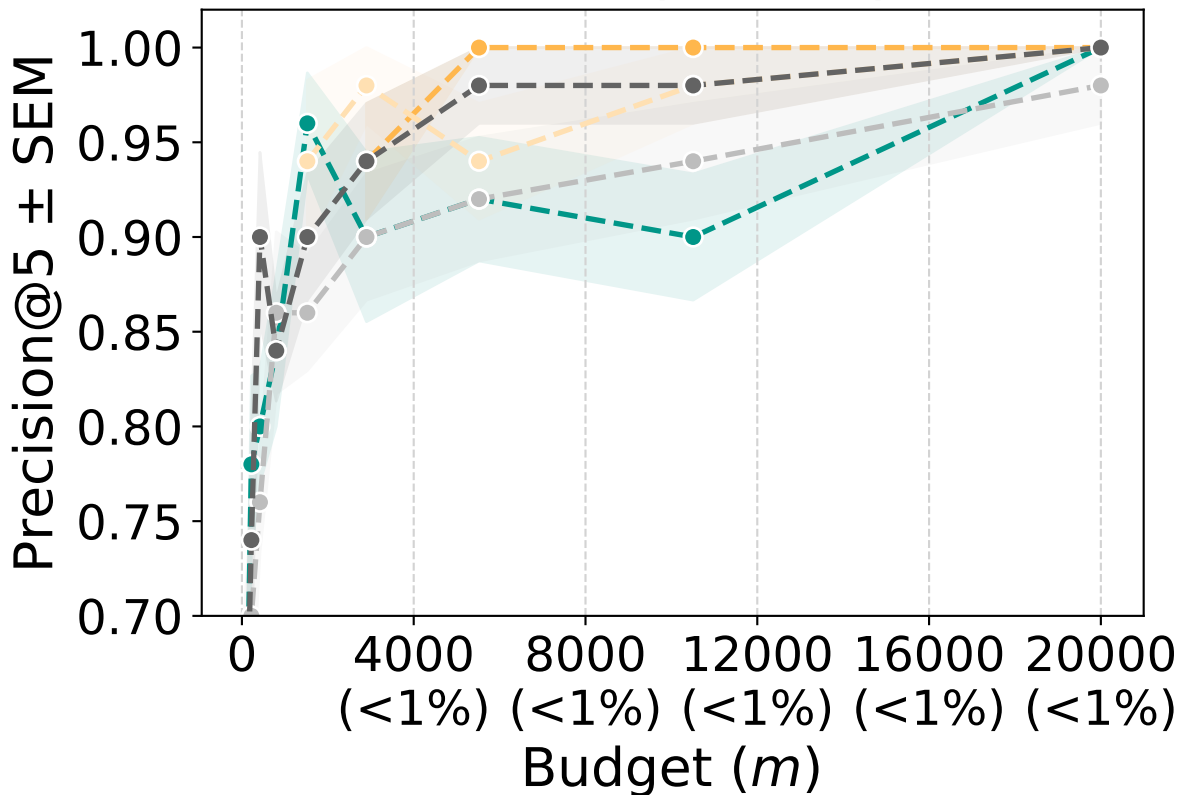

Supplement: supplementary_material [file corrgroups60_random_forest_Precision@5_standard.pdf › shapiq/experiments/plots/pathdependent/corrgroups60_random_forest_Precision@5_standard.pdf]

# CG60 ( $d = 60$ )

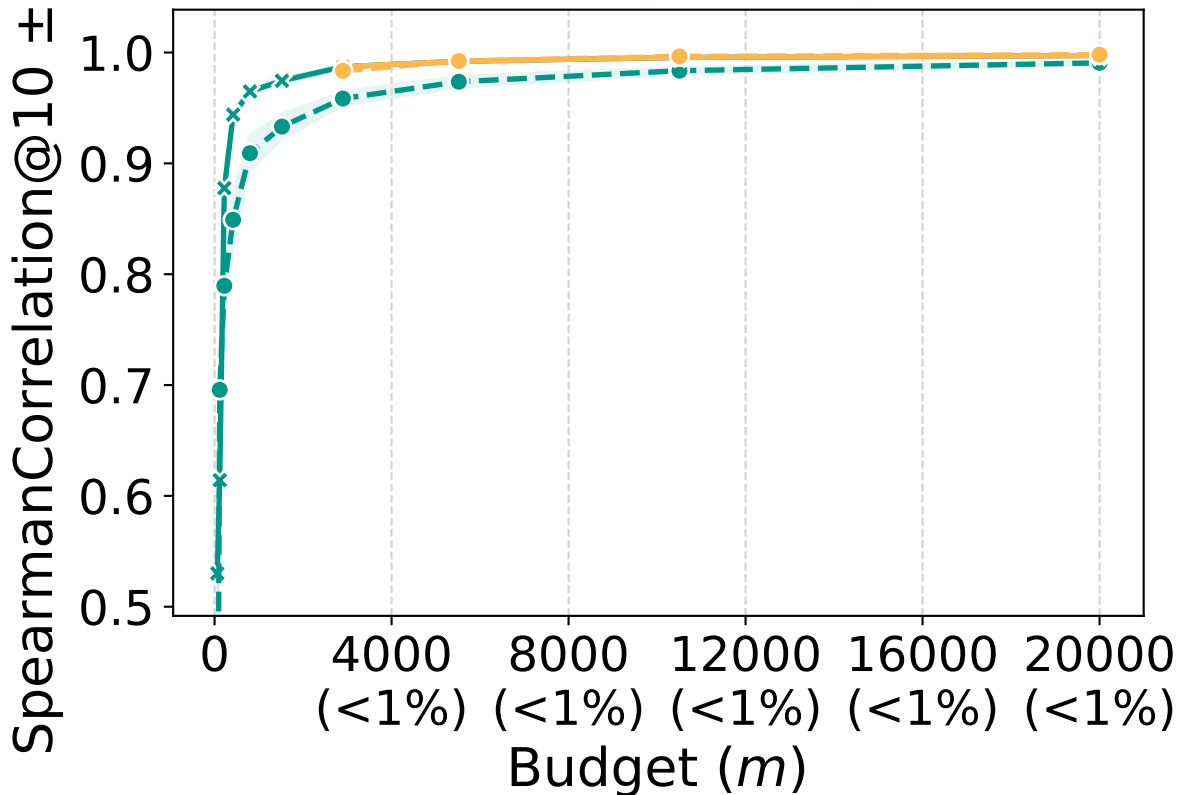

Supplement: supplementary_material [file corrgroups60_random_forest_SpearmanCorrelation@10_paired_vs_standard.pdf › shapiq/experiments/plots/pathdependent/corrgroups60_random_forest_SpearmanCorrelation@10_paired_vs_standard.pdf]
